# Supplementary material
Source: publisher figshare collection journal article supplement (https://acs.figshare.com/ndownloader/files/5341075)
Supplement: Supplementary file 1 [file 5341075]

 
data_compound1H 
 
_audit_creation_method            SHELXL-97 
_chemical_name_systematic 
; 
 ? 
; 
_chemical_name_common             ? 
_chemical_melting_point           ? 
_chemical_formula_moiety          ? 
_chemical_formula_sum 
 'C28 H27 N3 O' 
_chemical_formula_weight          421.53 
 
loop_ 
 _atom_type_symbol 
 _atom_type_description 
 _atom_type_scat_dispersion_real 
 _atom_type_scat_dispersion_imag 
 _atom_type_scat_source 
 'C'  'C'   0.0033   0.0000 
 'International Tables Vol C Tables 4.2.6.8 and 6.1.1.4' 
 'H'  'H'   0.0000   0.0000 
 'International Tables Vol C Tables 4.2.6.8 and 6.1.1.4' 
 'N'  'N'   0.0061   0.0000 
 'International Tables Vol C Tables 4.2.6.8 and 6.1.1.4' 
 'O'  'O'   0.0106   0.0000 
 'International Tables Vol C Tables 4.2.6.8 and 6.1.1.4' 
 
_symmetry_cell_setting            Monoclinic  
_symmetry_space_group_name_H-M    P2(1) 
 
loop_ 
 _symmetry_equiv_pos_as_xyz 
 'x, y, z' 
 '-x, y+1/2, -z' 
 
_cell_length_a                    8.8927(15) 
_cell_length_b                    14.556(3) 
_cell_length_c                    9.4158(17) 
_cell_angle_alpha                 90.00 
_cell_angle_beta                  107.080(3) 
_cell_angle_gamma                 90.00 
_cell_volume                      1165.0(4) 
_cell_formula_units_Z             2 
_cell_measurement_temperature     294(2) 
_cell_measurement_reflns_used     3681 
_cell_measurement_theta_min       2.26 
_cell_measurement_theta_max       26.35 
 
_exptl_crystal_description        block 
_exptl_crystal_colour             yellow 
_exptl_crystal_size_max           0.24 
_exptl_crystal_size_mid           0.20 
_exptl_crystal_size_min           0.18 
_exptl_crystal_density_meas       none 
_exptl_crystal_density_diffrn     1.202 
_exptl_crystal_density_method     'not measured' 
_exptl_crystal_F_000              448 
_exptl_absorpt_coefficient_mu     0.074 
_exptl_absorpt_correction_type    MULTI-SCAN 
_exptl_absorpt_correction_T_min   0.9825 
_exptl_absorpt_correction_T_max   0.9868 
_exptl_absorpt_process_details    SADABS 
 
_exptl_special_details 
; 
 ? 
; 
 
_diffrn_ambient_temperature       294(2) 
_diffrn_radiation_wavelength      0.71073 
_diffrn_radiation_type            MoK\a 
_diffrn_radiation_source          'fine-focus sealed tube' 
_diffrn_radiation_monochromator   graphite 
_diffrn_measurement_device_type   'CCD area detector' 
_diffrn_measurement_method        'phi and omega scans' 
_diffrn_detector_area_resol_mean  ? 
_diffrn_standards_number          . 
_diffrn_standards_interval_count  . 
_diffrn_standards_interval_time   . 
_diffrn_standards_decay_%         . 
_diffrn_reflns_number             6511 
_diffrn_reflns_av_R_equivalents   0.0241 
_diffrn_reflns_av_sigmaI/netI     0.0270 
_diffrn_reflns_limit_h_min        -11 
_diffrn_reflns_limit_h_max        9 
_diffrn_reflns_limit_k_min        -11 
_diffrn_reflns_limit_k_max        18 
_diffrn_reflns_limit_l_min        -8 
_diffrn_reflns_limit_l_max        11 
_diffrn_reflns_theta_min          2.26 
_diffrn_reflns_theta_max          26.40 
_reflns_number_total              2470 
_reflns_number_gt                 2115 
_reflns_threshold_expression      >2sigma(I) 
 
_computing_data_collection        'Bruker SMART' 
_computing_cell_refinement        'Bruker SMART' 
_computing_data_reduction         'Bruker SAINT' 
_computing_structure_solution     'SHELXS-97 (Sheldrick, 1990)' 
_computing_structure_refinement   'SHELXL-97 (Sheldrick, 1997)' 
_computing_molecular_graphics     'Bruker SHELXTL' 
_computing_publication_material   'Bruker SHELXTL' 
 
_refine_special_details 
; 
 Refinement of F^2^ against ALL reflections.  The weighted R-factor wR and 
 goodness of fit S are based on F^2^, conventional R-factors R are based 
 on F, with F set to zero for negative F^2^. The threshold expression of 
 F^2^ > 2sigma(F^2^) is used only for calculating R-factors(gt) etc. and is 
 not relevant to the choice of reflections for refinement.  R-factors based 
 on F^2^ are statistically about twice as large as those based on F, and R- 
 factors based on ALL data will be even larger. 
; 
 
_refine_ls_structure_factor_coef  Fsqd  
_refine_ls_matrix_type            full 
_refine_ls_weighting_scheme       calc  
_refine_ls_weighting_details 
 'calc w=1/[\s^2^(Fo^2^)+(0.0573P)^2^+0.1571P] where P=(Fo^2^+2Fc^2^)/3' 
_atom_sites_solution_primary      direct 
_atom_sites_solution_secondary    difmap 
_atom_sites_solution_hydrogens    geom 
_refine_ls_hydrogen_treatment     theo 
_refine_ls_extinction_method      none 
_refine_ls_extinction_coef        ? 
_refine_ls_abs_structure_details 
 'Flack H D (1983), Acta Cryst. A39, 876-881' 
_refine_ls_abs_structure_Flack    -10(10) 
_refine_ls_number_reflns          2470 
_refine_ls_number_parameters      292 
_refine_ls_number_restraints      1 
_refine_ls_R_factor_all           0.0552 
_refine_ls_R_factor_gt            0.0420 
_refine_ls_wR_factor_ref          0.1124 
_refine_ls_wR_factor_gt           0.1001 
_refine_ls_goodness_of_fit_ref    1.090 
_refine_ls_restrained_S_all       1.090 
_refine_ls_shift/su_max           0.000 
_refine_ls_shift/su_mean          0.000 
 
loop_ 
 _atom_site_label 
 _atom_site_type_symbol 
 _atom_site_fract_x 
 _atom_site_fract_y 
 _atom_site_fract_z 
 _atom_site_U_iso_or_equiv 
 _atom_site_adp_type 
 _atom_site_occupancy 
 _atom_site_symmetry_multiplicity 
 _atom_site_calc_flag 
 _atom_site_refinement_flags 
 _atom_site_disorder_assembly 
 _atom_site_disorder_group 
N1 N 0.3173(3) 0.70843(18) 0.7221(3) 0.0604(6) Uani 1 1 d . . . 
H1 H 0.3734 0.6959 0.6641 0.072 Uiso 1 1 calc R . . 
N2 N 0.6461(3) 0.68511(15) 0.9013(2) 0.0482(5) Uani 1 1 d . . . 
N3 N 0.5507(2) 0.50175(18) 1.0279(2) 0.0511(6) Uani 1 1 d . . . 
C1 C 0.1595(4) 0.7180(3) 0.6794(4) 0.0702(9) Uani 1 1 d . . . 
H1C H 0.0934 0.7117 0.5830 0.084 Uiso 1 1 calc R . . 
C2 C 0.1133(4) 0.7384(2) 0.8014(5) 0.0732(10) Uani 1 1 d . . . 
H2 H 0.0108 0.7491 0.8032 0.088 Uiso 1 1 calc R . . 
C3 C 0.2481(4) 0.7404(3) 0.9230(4) 0.0707(9) Uani 1 1 d . . . 
H3 H 0.2518 0.7522 1.0211 0.085 Uiso 1 1 calc R . . 
C4 C 0.3741(3) 0.7218(2) 0.8717(3) 0.0565(7) Uani 1 1 d . . . 
C5 C 0.5351(4) 0.7073(2) 0.9567(3) 0.0563(7) Uani 1 1 d . . . 
H5 H 0.5609 0.7144 1.0592 0.068 Uiso 1 1 calc R . . 
C6 C 0.7928(3) 0.66407(19) 1.0063(3) 0.0461(6) Uani 1 1 d . . . 
C7 C 0.8802(4) 0.7337(2) 1.1005(4) 0.0639(8) Uani 1 1 d . . . 
H7 H 0.8420 0.7936 1.0920 0.077 Uiso 1 1 calc R . . 
C8 C 1.0185(4) 0.7136(3) 1.2026(4) 0.0681(9) Uani 1 1 d . . . 
H8 H 1.0751 0.7603 1.2622 0.082 Uiso 1 1 calc R . . 
C9 C 1.0779(3) 0.6243(3) 1.2203(3) 0.0563(7) Uani 1 1 d . . . 
C10 C 1.2187(4) 0.6002(3) 1.3308(4) 0.0772(12) Uani 1 1 d . . . 
H10 H 1.2781 0.6462 1.3901 0.093 Uiso 1 1 calc R . . 
C11 C 1.2691(4) 0.5126(4) 1.3525(3) 0.0772(11) Uani 1 1 d . . . 
H11 H 1.3601 0.4986 1.4281 0.093 Uiso 1 1 calc R . . 
C12 C 1.1840(3) 0.4420(3) 1.2611(4) 0.0694(10) Uani 1 1 d . . . 
H12 H 1.2190 0.3816 1.2764 0.083 Uiso 1 1 calc R . . 
C13 C 1.0500(3) 0.4624(2) 1.1495(3) 0.0528(7) Uani 1 1 d . . . 
H13 H 0.9959 0.4156 1.0883 0.063 Uiso 1 1 calc R . . 
C14 C 0.9927(3) 0.5532(2) 1.1260(3) 0.0438(6) Uani 1 1 d . . . 
C15 C 0.8490(3) 0.57539(19) 1.0147(3) 0.0396(5) Uani 1 1 d . . . 
C16 C 0.7570(3) 0.50560(17) 0.9070(2) 0.0366(5) Uani 1 1 d . . . 
C17 C 0.8147(3) 0.47839(17) 0.7864(2) 0.0385(5) Uani 1 1 d . . . 
C18 C 0.9617(3) 0.5078(2) 0.7732(3) 0.0479(6) Uani 1 1 d . . . 
H18 H 1.0265 0.5443 0.8473 0.058 Uiso 1 1 calc R . . 
C19 C 1.0099(4) 0.4834(2) 0.6535(3) 0.0595(8) Uani 1 1 d . . . 
H19 H 1.1072 0.5033 0.6475 0.071 Uiso 1 1 calc R . . 
C20 C 0.9154(4) 0.4289(2) 0.5401(3) 0.0662(9) Uani 1 1 d . . . 
H20 H 0.9496 0.4130 0.4590 0.079 Uiso 1 1 calc R . . 
C21 C 0.7740(4) 0.3993(2) 0.5482(3) 0.0581(8) Uani 1 1 d . . . 
H21 H 0.7114 0.3634 0.4719 0.070 Uiso 1 1 calc R . . 
C22 C 0.7194(3) 0.42209(18) 0.6709(3) 0.0451(6) Uani 1 1 d . . . 
C23 C 0.5719(3) 0.39360(19) 0.6796(3) 0.0533(7) Uani 1 1 d . . . 
H23 H 0.5088 0.3571 0.6045 0.064 Uiso 1 1 calc R . . 
C24 C 0.5195(3) 0.4185(2) 0.7963(3) 0.0524(7) Uani 1 1 d . . . 
H24 H 0.4217 0.3979 0.8000 0.063 Uiso 1 1 calc R . . 
C25 C 0.6110(3) 0.47495(18) 0.9122(3) 0.0422(6) Uani 1 1 d . . . 
C26 C 0.3815(3) 0.4953(3) 1.0026(4) 0.0716(9) Uani 1 1 d . . . 
H26A H 0.3280 0.5142 0.9029 0.107 Uiso 1 1 calc R . . 
H26B H 0.3512 0.5345 1.0714 0.107 Uiso 1 1 calc R . . 
H26C H 0.3538 0.4330 1.0168 0.107 Uiso 1 1 calc R . . 
C27 C 0.6406(4) 0.4814(3) 1.1798(3) 0.0651(8) Uani 1 1 d . . . 
H27A H 0.6026 0.4254 1.2109 0.098 Uiso 1 1 d R . . 
H27B H 0.6291 0.5307 1.2434 0.098 Uiso 1 1 d R . . 
H27C H 0.7496 0.4744 1.1857 0.098 Uiso 1 1 d R . . 
O1 O 0.5763(3) 0.7051(3) 0.5910(3) 0.1076(12) Uani 1 1 d . . . 
H1A H 0.6301 0.7073 0.6781 0.161 Uiso 1 1 calc R . . 
C28 C 0.6642(5) 0.6700(4) 0.5059(4) 0.0917(13) Uani 1 1 d . . . 
H28A H 0.7580 0.7059 0.5205 0.138 Uiso 1 1 calc R . . 
H28B H 0.6039 0.6719 0.4030 0.138 Uiso 1 1 calc R . . 
H28C H 0.6921 0.6075 0.5345 0.138 Uiso 1 1 calc R . . 
 
loop_ 
 _atom_site_aniso_label 
 _atom_site_aniso_U_11 
 _atom_site_aniso_U_22 
 _atom_site_aniso_U_33 
 _atom_site_aniso_U_23 
 _atom_site_aniso_U_13 
 _atom_site_aniso_U_12 
N1 0.0574(14) 0.0587(16) 0.0624(15) 0.0118(13) 0.0134(11) 0.0099(12) 
N2 0.0525(12) 0.0413(12) 0.0476(12) -0.0012(10) 0.0098(10) 0.0051(10) 
N3 0.0383(11) 0.0643(16) 0.0500(12) 0.0033(12) 0.0116(9) -0.0034(10) 
C1 0.0554(17) 0.067(2) 0.080(2) 0.0151(18) 0.0068(16) 0.0069(16) 
C2 0.0566(18) 0.0559(19) 0.111(3) 0.0040(19) 0.0302(19) 0.0059(15) 
C3 0.070(2) 0.067(2) 0.083(2) -0.0070(18) 0.0336(18) 0.0054(17) 
C4 0.0580(16) 0.0476(16) 0.0646(17) 0.0019(15) 0.0192(14) 0.0075(14) 
C5 0.0649(17) 0.0489(16) 0.0537(15) -0.0029(13) 0.0150(13) 0.0053(14) 
C6 0.0496(14) 0.0454(15) 0.0415(12) -0.0059(12) 0.0105(11) -0.0034(12) 
C7 0.0697(19) 0.0519(18) 0.0672(19) -0.0199(15) 0.0158(16) -0.0045(15) 
C8 0.0621(18) 0.073(2) 0.0638(19) -0.0336(18) 0.0105(14) -0.0202(18) 
C9 0.0454(14) 0.079(2) 0.0412(13) -0.0140(14) 0.0074(11) -0.0120(14) 
C10 0.0497(17) 0.123(4) 0.0486(17) -0.023(2) -0.0010(13) -0.016(2) 
C11 0.0414(15) 0.131(4) 0.0471(16) 0.008(2) -0.0062(12) 0.003(2) 
C12 0.0490(16) 0.095(3) 0.0618(19) 0.0233(19) 0.0123(14) 0.0094(17) 
C13 0.0425(13) 0.0637(19) 0.0490(14) 0.0066(13) 0.0084(11) -0.0028(13) 
C14 0.0369(12) 0.0586(16) 0.0338(12) -0.0037(11) 0.0074(10) -0.0051(11) 
C15 0.0375(12) 0.0451(14) 0.0336(11) -0.0055(10) 0.0064(9) -0.0063(10) 
C16 0.0366(11) 0.0344(12) 0.0326(10) 0.0022(10) 0.0004(9) 0.0027(10) 
C17 0.0436(12) 0.0336(12) 0.0337(11) 0.0022(10) 0.0042(9) 0.0035(10) 
C18 0.0493(14) 0.0491(15) 0.0437(13) -0.0024(12) 0.0111(11) 0.0020(12) 
C19 0.0652(18) 0.065(2) 0.0553(15) 0.0059(15) 0.0281(14) 0.0083(16) 
C20 0.095(2) 0.062(2) 0.0455(15) 0.0016(15) 0.0261(16) 0.0181(19) 
C21 0.082(2) 0.0468(17) 0.0371(13) -0.0051(12) 0.0049(13) 0.0123(15) 
C22 0.0569(15) 0.0343(13) 0.0359(12) 0.0010(11) 0.0011(11) 0.0063(12) 
C23 0.0557(15) 0.0434(15) 0.0459(15) -0.0069(12) -0.0082(12) -0.0091(12) 
C24 0.0428(13) 0.0495(16) 0.0557(15) -0.0009(13) 0.0003(12) -0.0105(12) 
C25 0.0370(11) 0.0440(14) 0.0406(12) 0.0055(11) 0.0035(10) -0.0010(11) 
C26 0.0476(16) 0.085(3) 0.086(2) -0.004(2) 0.0256(15) -0.0079(16) 
C27 0.0695(19) 0.079(2) 0.0496(15) 0.0051(15) 0.0218(14) 0.0039(17) 
O1 0.0791(16) 0.182(4) 0.0606(14) 0.0184(19) 0.0193(13) 0.037(2) 
C28 0.096(3) 0.103(3) 0.074(2) 0.004(2) 0.022(2) 0.033(2) 
 
_geom_special_details 
; 
 All esds (except the esd in the dihedral angle between two l.s. planes) 
 are estimated using the full covariance matrix.  The cell esds are taken 
 into account individually in the estimation of esds in distances, angles 
 and torsion angles; correlations between esds in cell parameters are only 
 used when they are defined by crystal symmetry.  An approximate (isotropic) 
 treatment of cell esds is used for estimating esds involving l.s. planes. 
; 
 
loop_ 
 _geom_bond_atom_site_label_1 
 _geom_bond_atom_site_label_2 
 _geom_bond_distance 
 _geom_bond_site_symmetry_2 
 _geom_bond_publ_flag 
N1 C1 1.349(4) . ? 
N1 C4 1.363(4) . ? 
N1 H1 0.8600 . ? 
N2 C5 1.286(4) . ? 
N2 C6 1.420(3) . ? 
N3 C25 1.404(3) . ? 
N3 C27 1.449(3) . ? 
N3 C26 1.455(3) . ? 
C1 C2 1.361(5) . ? 
C1 H1C 0.9300 . ? 
C2 C3 1.394(5) . ? 
C2 H2 0.9300 . ? 
C3 C4 1.372(4) . ? 
C3 H3 0.9300 . ? 
C4 C5 1.436(4) . ? 
C5 H5 0.9300 . ? 
C6 C15 1.378(4) . ? 
C6 C7 1.419(4) . ? 
C7 C8 1.352(4) . ? 
C7 H7 0.9300 . ? 
C8 C9 1.395(5) . ? 
C8 H8 0.9300 . ? 
C9 C10 1.417(5) . ? 
C9 C14 1.427(4) . ? 
C10 C11 1.347(6) . ? 
C10 H10 0.9300 . ? 
C11 C12 1.409(6) . ? 
C11 H11 0.9300 . ? 
C12 C13 1.370(4) . ? 
C12 H12 0.9300 . ? 
C13 C14 1.410(4) . ? 
C13 H13 0.9300 . ? 
C14 C15 1.431(3) . ? 
C15 C16 1.498(3) . ? 
C16 C25 1.387(3) . ? 
C16 C17 1.432(3) . ? 
C17 C18 1.415(4) . ? 
C17 C22 1.425(3) . ? 
C18 C19 1.365(4) . ? 
C18 H18 0.9300 . ? 
C19 C20 1.396(5) . ? 
C19 H19 0.9300 . ? 
C20 C21 1.352(5) . ? 
C20 H20 0.9300 . ? 
C21 C22 1.418(4) . ? 
C21 H21 0.9300 . ? 
C22 C23 1.400(4) . ? 
C23 C24 1.363(4) . ? 
C23 H23 0.9300 . ? 
C24 C25 1.417(4) . ? 
C24 H24 0.9300 . ? 
C26 H26A 0.9600 . ? 
C26 H26B 0.9600 . ? 
C26 H26C 0.9600 . ? 
C27 H27A 0.9600 . ? 
C27 H27B 0.9599 . ? 
C27 H27C 0.9600 . ? 
O1 C28 1.372(5) . ? 
O1 H1A 0.8200 . ? 
C28 H28A 0.9600 . ? 
C28 H28B 0.9600 . ? 
C28 H28C 0.9600 . ? 
 
loop_ 
 _geom_angle_atom_site_label_1 
 _geom_angle_atom_site_label_2 
 _geom_angle_atom_site_label_3 
 _geom_angle 
 _geom_angle_site_symmetry_1 
 _geom_angle_site_symmetry_3 
 _geom_angle_publ_flag 
C1 N1 C4 109.3(3) . . ? 
C1 N1 H1 125.4 . . ? 
C4 N1 H1 125.4 . . ? 
C5 N2 C6 115.4(2) . . ? 
C25 N3 C27 118.9(2) . . ? 
C25 N3 C26 117.8(2) . . ? 
C27 N3 C26 113.1(3) . . ? 
N1 C1 C2 108.4(3) . . ? 
N1 C1 H1C 125.8 . . ? 
C2 C1 H1C 125.8 . . ? 
C1 C2 C3 107.4(3) . . ? 
C1 C2 H2 126.3 . . ? 
C3 C2 H2 126.3 . . ? 
C4 C3 C2 107.5(3) . . ? 
C4 C3 H3 126.3 . . ? 
C2 C3 H3 126.3 . . ? 
N1 C4 C3 107.4(3) . . ? 
N1 C4 C5 124.1(3) . . ? 
C3 C4 C5 128.1(3) . . ? 
N2 C5 C4 124.7(3) . . ? 
N2 C5 H5 117.6 . . ? 
C4 C5 H5 117.6 . . ? 
C15 C6 C7 120.7(2) . . ? 
C15 C6 N2 119.0(2) . . ? 
C7 C6 N2 120.3(3) . . ? 
C8 C7 C6 120.4(3) . . ? 
C8 C7 H7 119.8 . . ? 
C6 C7 H7 119.8 . . ? 
C7 C8 C9 121.4(3) . . ? 
C7 C8 H8 119.3 . . ? 
C9 C8 H8 119.3 . . ? 
C8 C9 C10 122.7(3) . . ? 
C8 C9 C14 119.2(3) . . ? 
C10 C9 C14 118.1(3) . . ? 
C11 C10 C9 121.8(3) . . ? 
C11 C10 H10 119.1 . . ? 
C9 C10 H10 119.1 . . ? 
C10 C11 C12 120.2(3) . . ? 
C10 C11 H11 119.9 . . ? 
C12 C11 H11 119.9 . . ? 
C13 C12 C11 120.1(4) . . ? 
C13 C12 H12 120.0 . . ? 
C11 C12 H12 120.0 . . ? 
C12 C13 C14 121.1(3) . . ? 
C12 C13 H13 119.5 . . ? 
C14 C13 H13 119.5 . . ? 
C13 C14 C9 118.7(2) . . ? 
C13 C14 C15 122.0(2) . . ? 
C9 C14 C15 119.2(3) . . ? 
C6 C15 C14 119.0(2) . . ? 
C6 C15 C16 118.7(2) . . ? 
C14 C15 C16 122.4(2) . . ? 
C25 C16 C17 119.7(2) . . ? 
C25 C16 C15 121.7(2) . . ? 
C17 C16 C15 118.2(2) . . ? 
C18 C17 C22 117.7(2) . . ? 
C18 C17 C16 122.8(2) . . ? 
C22 C17 C16 119.5(2) . . ? 
C19 C18 C17 121.0(3) . . ? 
C19 C18 H18 119.5 . . ? 
C17 C18 H18 119.5 . . ? 
C18 C19 C20 121.0(3) . . ? 
C18 C19 H19 119.5 . . ? 
C20 C19 H19 119.5 . . ? 
C21 C20 C19 119.9(3) . . ? 
C21 C20 H20 120.1 . . ? 
C19 C20 H20 120.1 . . ? 
C20 C21 C22 121.2(3) . . ? 
C20 C21 H21 119.4 . . ? 
C22 C21 H21 119.4 . . ? 
C23 C22 C21 121.9(3) . . ? 
C23 C22 C17 118.9(2) . . ? 
C21 C22 C17 119.1(3) . . ? 
C24 C23 C22 121.1(2) . . ? 
C24 C23 H23 119.4 . . ? 
C22 C23 H23 119.4 . . ? 
C23 C24 C25 121.3(2) . . ? 
C23 C24 H24 119.3 . . ? 
C25 C24 H24 119.3 . . ? 
C16 C25 N3 120.9(2) . . ? 
C16 C25 C24 119.4(2) . . ? 
N3 C25 C24 119.7(2) . . ? 
N3 C26 H26A 109.5 . . ? 
N3 C26 H26B 109.5 . . ? 
H26A C26 H26B 109.5 . . ? 
N3 C26 H26C 109.5 . . ? 
H26A C26 H26C 109.5 . . ? 
H26B C26 H26C 109.5 . . ? 
N3 C27 H27A 109.5 . . ? 
N3 C27 H27B 109.5 . . ? 
H27A C27 H27B 109.5 . . ? 
N3 C27 H27C 109.5 . . ? 
H27A C27 H27C 109.5 . . ? 
H27B C27 H27C 109.5 . . ? 
C28 O1 H1A 109.5 . . ? 
O1 C28 H28A 109.5 . . ? 
O1 C28 H28B 109.5 . . ? 
H28A C28 H28B 109.5 . . ? 
O1 C28 H28C 109.5 . . ? 
H28A C28 H28C 109.5 . . ? 
H28B C28 H28C 109.5 . . ? 
 
loop_ 
 _geom_torsion_atom_site_label_1 
 _geom_torsion_atom_site_label_2 
 _geom_torsion_atom_site_label_3 
 _geom_torsion_atom_site_label_4 
 _geom_torsion 
 _geom_torsion_site_symmetry_1 
 _geom_torsion_site_symmetry_2 
 _geom_torsion_site_symmetry_3 
 _geom_torsion_site_symmetry_4 
 _geom_torsion_publ_flag 
C4 N1 C1 C2 0.5(4) . . . . ? 
N1 C1 C2 C3 -0.6(4) . . . . ? 
C1 C2 C3 C4 0.5(4) . . . . ? 
C1 N1 C4 C3 -0.2(4) . . . . ? 
C1 N1 C4 C5 173.2(3) . . . . ? 
C2 C3 C4 N1 -0.2(4) . . . . ? 
C2 C3 C4 C5 -173.2(3) . . . . ? 
C6 N2 C5 C4 -173.2(3) . . . . ? 
N1 C4 C5 N2 4.1(5) . . . . ? 
C3 C4 C5 N2 176.0(3) . . . . ? 
C5 N2 C6 C15 113.3(3) . . . . ? 
C5 N2 C6 C7 -67.0(4) . . . . ? 
C15 C6 C7 C8 -1.6(5) . . . . ? 
N2 C6 C7 C8 178.8(3) . . . . ? 
C6 C7 C8 C9 -1.1(5) . . . . ? 
C7 C8 C9 C10 -177.0(3) . . . . ? 
C7 C8 C9 C14 1.6(5) . . . . ? 
C8 C9 C10 C11 175.6(3) . . . . ? 
C14 C9 C10 C11 -2.9(5) . . . . ? 
C9 C10 C11 C12 2.1(6) . . . . ? 
C10 C11 C12 C13 0.1(5) . . . . ? 
C11 C12 C13 C14 -1.4(5) . . . . ? 
C12 C13 C14 C9 0.5(4) . . . . ? 
C12 C13 C14 C15 -177.0(3) . . . . ? 
C8 C9 C14 C13 -177.0(3) . . . . ? 
C10 C9 C14 C13 1.6(4) . . . . ? 
C8 C9 C14 C15 0.6(4) . . . . ? 
C10 C9 C14 C15 179.2(3) . . . . ? 
C7 C6 C15 C14 3.7(4) . . . . ? 
N2 C6 C15 C14 -176.6(2) . . . . ? 
C7 C6 C15 C16 -176.5(2) . . . . ? 
N2 C6 C15 C16 3.1(4) . . . . ? 
C13 C14 C15 C6 174.4(2) . . . . ? 
C9 C14 C15 C6 -3.2(4) . . . . ? 
C13 C14 C15 C16 -5.4(4) . . . . ? 
C9 C14 C15 C16 177.1(2) . . . . ? 
C6 C15 C16 C25 -68.3(3) . . . . ? 
C14 C15 C16 C25 111.5(3) . . . . ? 
C6 C15 C16 C17 104.6(3) . . . . ? 
C14 C15 C16 C17 -75.6(3) . . . . ? 
C25 C16 C17 C18 179.4(2) . . . . ? 
C15 C16 C17 C18 6.3(3) . . . . ? 
C25 C16 C17 C22 1.7(3) . . . . ? 
C15 C16 C17 C22 -171.4(2) . . . . ? 
C22 C17 C18 C19 0.4(4) . . . . ? 
C16 C17 C18 C19 -177.3(3) . . . . ? 
C17 C18 C19 C20 0.2(5) . . . . ? 
C18 C19 C20 C21 -0.2(5) . . . . ? 
C19 C20 C21 C22 -0.4(5) . . . . ? 
C20 C21 C22 C23 178.7(3) . . . . ? 
C20 C21 C22 C17 1.0(4) . . . . ? 
C18 C17 C22 C23 -178.7(2) . . . . ? 
C16 C17 C22 C23 -0.9(3) . . . . ? 
C18 C17 C22 C21 -0.9(4) . . . . ? 
C16 C17 C22 C21 176.8(2) . . . . ? 
C21 C22 C23 C24 -178.0(3) . . . . ? 
C17 C22 C23 C24 -0.3(4) . . . . ? 
C22 C23 C24 C25 0.8(4) . . . . ? 
C17 C16 C25 N3 -179.0(2) . . . . ? 
C15 C16 C25 N3 -6.2(4) . . . . ? 
C17 C16 C25 C24 -1.2(4) . . . . ? 
C15 C16 C25 C24 171.6(2) . . . . ? 
C27 N3 C25 C16 -58.0(4) . . . . ? 
C26 N3 C25 C16 159.0(3) . . . . ? 
C27 N3 C25 C24 124.2(3) . . . . ? 
C26 N3 C25 C24 -18.8(4) . . . . ? 
C23 C24 C25 C16 -0.1(4) . . . . ? 
C23 C24 C25 N3 177.8(3) . . . . ? 
 
loop_ 
 _geom_hbond_atom_site_label_D 
 _geom_hbond_atom_site_label_H 
 _geom_hbond_atom_site_label_A 
 _geom_hbond_distance_DH 
 _geom_hbond_distance_HA 
 _geom_hbond_distance_DA 
 _geom_hbond_angle_DHA 
 _geom_hbond_site_symmetry_A 
N1 H1 O1  0.86 2.12 2.916(4) 154.3 . 
O1 H1A N2  0.82 2.09 2.818(3) 147.9 . 
 
_diffrn_measured_fraction_theta_max    0.992 
_diffrn_reflns_theta_full              26.40 
_diffrn_measured_fraction_theta_full   0.992 
_refine_diff_density_max    0.230 
_refine_diff_density_min   -0.192 
_refine_diff_density_rms    0.042 

#===END
  
data_compound2 
  
_audit_creation_method            SHELXL-97 
_chemical_name_systematic 
; 
 ? 
; 
_chemical_name_common             ? 
_chemical_melting_point           ? 
_chemical_formula_moiety          'C67 H70 N7 Si2 Sm' 
_chemical_formula_sum 
 'C67 H70 N7 Si2 Sm' 
_chemical_formula_weight          1179.83 
_chemical_absolute_configuration  rmad
  
loop_ 
 _atom_type_symbol 
 _atom_type_description 
 _atom_type_scat_dispersion_real 
 _atom_type_scat_dispersion_imag 
 _atom_type_scat_source 
 'C'  'C'   0.0033   0.0016 
 'International Tables Vol C Tables 4.2.6.8 and 6.1.1.4' 
 'H'  'H'   0.0000   0.0000 
 'International Tables Vol C Tables 4.2.6.8 and 6.1.1.4' 
 'N'  'N'   0.0061   0.0033 
 'International Tables Vol C Tables 4.2.6.8 and 6.1.1.4' 
 'Si'  'Si'   0.0817   0.0704 
 'International Tables Vol C Tables 4.2.6.8 and 6.1.1.4' 
 'Sm'  'Sm'  -0.1638   3.4418 
 'International Tables Vol C Tables 4.2.6.8 and 6.1.1.4' 
  
_symmetry_cell_setting            orthorhombic 
_symmetry_space_group_name_H-M    'P 21 21 21' 
  
loop_ 
 _symmetry_equiv_pos_as_xyz 
 'x, y, z' 
 'x+1/2, -y+1/2, -z' 
 '-x, y+1/2, -z+1/2' 
 '-x+1/2, -y, z+1/2' 
  
_cell_length_a                    11.515(2) 
_cell_length_b                    21.460(4) 
_cell_length_c                    24.200(5) 
_cell_angle_alpha                 90.00 
_cell_angle_beta                  90.00 
_cell_angle_gamma                 90.00 
_cell_volume                      5980(2) 
_cell_formula_units_Z             4 
_cell_measurement_temperature     113(2) 
_cell_measurement_reflns_used     16151 
_cell_measurement_theta_min       1.7 
_cell_measurement_theta_max       27.9 
  
_exptl_crystal_description        block 
_exptl_crystal_colour             yellow 
_exptl_crystal_size_max           0.24 
_exptl_crystal_size_mid           0.22 
_exptl_crystal_size_min           0.14 
_exptl_crystal_density_meas       ? 
_exptl_crystal_density_diffrn     1.310 
_exptl_crystal_density_method     'not measured' 
_exptl_crystal_F_000              2444 
_exptl_absorpt_coefficient_mu     1.068 
_exptl_absorpt_correction_type    multi-scan 
_exptl_absorpt_correction_T_min   0.7836 
_exptl_absorpt_correction_T_max   0.8648 
_exptl_absorpt_process_details    Crystalclear
  
_exptl_special_details 
; 
 ? 
; 
  
_diffrn_ambient_temperature       113(2) 
_diffrn_radiation_wavelength      0.71070 
_diffrn_radiation_type            MoK\a 
_diffrn_radiation_source          'rotating anode' 
_diffrn_radiation_monochromator   confocal
_diffrn_measurement_device_type   'Rigaku Saturn' 
_diffrn_measurement_method        \w 
_diffrn_detector_area_resol_mean  7.31 
_diffrn_standards_number          ? 
_diffrn_standards_interval_count  ? 
_diffrn_standards_interval_time   ? 
_diffrn_standards_decay_%         ? 
_diffrn_reflns_number             59321 
_diffrn_reflns_av_R_equivalents   0.0448 
_diffrn_reflns_av_sigmaI/netI     0.0436 
_diffrn_reflns_limit_h_min        -15 
_diffrn_reflns_limit_h_max        15 
_diffrn_reflns_limit_k_min        -28 
_diffrn_reflns_limit_k_max        28 
_diffrn_reflns_limit_l_min        -31 
_diffrn_reflns_limit_l_max        31 
_diffrn_reflns_theta_min          1.68 
_diffrn_reflns_theta_max          27.86 
_reflns_number_total              14236 
_reflns_number_gt                 13629 
_reflns_threshold_expression      >2sigma(I) 
  
_computing_data_collection        CrystalClear 
_computing_cell_refinement        CrystalClear 
_computing_data_reduction         CrystalClear 
_computing_structure_solution     'SHELXS-97 (Sheldrick, 1990)' 
_computing_structure_refinement   'SHELXL-97 (Sheldrick, 1997)' 
_computing_molecular_graphics     ? 
_computing_publication_material   'CrystalStructure 3.7.0' 
  
_refine_special_details 
; 
 Refinement of F^2^ against ALL reflections.  The weighted R-factor wR and 
 goodness of fit S are based on F^2^, conventional R-factors R are based 
 on F, with F set to zero for negative F^2^. The threshold expression of 
 F^2^ > 2sigma(F^2^) is used only for calculating R-factors(gt) etc. and is 
 not relevant to the choice of reflections for refinement.  R-factors based 
 on F^2^ are statistically about twice as large as those based on F, and R- 
 factors based on ALL data will be even larger. 
; 
  
_refine_ls_structure_factor_coef  Fsqd 
_refine_ls_matrix_type            full 
_refine_ls_weighting_scheme       calc 
_refine_ls_weighting_details 
 'calc w=1/[\s^2^(Fo^2^)+(0.0325P)^2^+0.0000P] where P=(Fo^2^+2Fc^2^)/3' 
_atom_sites_solution_primary      direct 
_atom_sites_solution_secondary    difmap 
_atom_sites_solution_hydrogens    geom 
_refine_ls_hydrogen_treatment     constr
_refine_ls_extinction_method      none 
_refine_ls_extinction_coef        ? 
_refine_ls_abs_structure_details 
 'Flack H D (1983), Acta Cryst. A39, 876-881' 
_refine_ls_abs_structure_Flack    -0.003(6) 
_refine_ls_number_reflns          14236 
_refine_ls_number_parameters      746 
_refine_ls_number_restraints      100 
_refine_ls_R_factor_all           0.0345 
_refine_ls_R_factor_gt            0.0321 
_refine_ls_wR_factor_ref          0.0693 
_refine_ls_wR_factor_gt           0.0681 
_refine_ls_goodness_of_fit_ref    1.067 
_refine_ls_restrained_S_all       1.066 
_refine_ls_shift/su_max           0.004 
_refine_ls_shift/su_mean          0.000 
  
loop_ 
 _atom_site_label 
 _atom_site_type_symbol 
 _atom_site_fract_x 
 _atom_site_fract_y 
 _atom_site_fract_z 
 _atom_site_U_iso_or_equiv 
 _atom_site_adp_type 
 _atom_site_occupancy 
 _atom_site_symmetry_multiplicity 
 _atom_site_calc_flag 
 _atom_site_refinement_flags 
 _atom_site_disorder_assembly 
 _atom_site_disorder_group 
Sm1 Sm 0.303730(11) 0.506572(6) 0.584916(5) 0.02432(4) Uani 1 1 d . . . 
Si1 Si 0.22221(8) 0.41649(4) 0.69822(4) 0.0364(2) Uani 1 1 d . . . 
Si2 Si 0.09581(7) 0.39379(4) 0.59024(4) 0.03441(18) Uani 1 1 d . . . 
N1 N 0.2785(2) 0.60433(11) 0.63791(9) 0.0271(5) Uani 1 1 d . . . 
N2 N 0.3217(2) 0.71893(12) 0.55600(10) 0.0368(6) Uani 1 1 d . . . 
N3 N 0.4831(2) 0.53813(11) 0.62462(10) 0.0302(5) Uani 1 1 d . . . 
N4 N 0.41549(19) 0.45945(10) 0.50702(9) 0.0241(5) Uani 1 1 d . . . 
N5 N 0.6832(3) 0.52821(11) 0.49130(11) 0.0427(7) Uani 1 1 d . . . 
N6 N 0.2440(2) 0.55158(11) 0.49862(10) 0.0306(5) Uani 1 1 d . . . 
N7 N 0.1994(2) 0.43260(10) 0.62893(9) 0.0291(5) Uani 1 1 d . . . 
C1 C 0.1520(2) 0.69972(13) 0.63981(10) 0.0237(6) Uani 1 1 d . . . 
C2 C 0.1698(2) 0.63552(13) 0.63796(10) 0.0259(6) Uani 1 1 d . . . 
C3 C 0.0737(3) 0.59492(14) 0.63143(11) 0.0321(7) Uani 1 1 d . . . 
H3 H 0.0867 0.5512 0.6304 0.039 Uiso 1 1 calc R . . 
C4 C -0.0367(3) 0.61685(14) 0.62659(12) 0.0327(7) Uani 1 1 d . . . 
H4 H -0.0991 0.5883 0.6222 0.039 Uiso 1 1 calc R . . 
C5 C -0.0596(3) 0.68124(15) 0.62806(11) 0.0303(6) Uani 1 1 d . . . 
C6 C 0.0358(2) 0.72303(13) 0.63409(10) 0.0266(6) Uani 1 1 d . . . 
C7 C 0.0109(3) 0.78792(14) 0.63343(11) 0.0320(7) Uani 1 1 d . . . 
H7 H 0.0731 0.8169 0.6361 0.038 Uiso 1 1 calc R . . 
C8 C -0.1005(3) 0.80974(16) 0.62909(12) 0.0402(8) Uani 1 1 d . . . 
H8 H -0.1146 0.8534 0.6285 0.048 Uiso 1 1 calc R . . 
C9 C -0.1939(3) 0.76799(16) 0.62554(12) 0.0426(7) Uani 1 1 d . . . 
H9 H -0.2711 0.7834 0.6237 0.051 Uiso 1 1 calc R . . 
C10 C -0.1741(3) 0.70517(17) 0.62465(12) 0.0385(7) Uani 1 1 d . . . 
H10 H -0.2379 0.6773 0.6217 0.046 Uiso 1 1 calc R . . 
C11 C 0.2492(2) 0.74477(13) 0.64736(12) 0.0270(6) Uani 1 1 d . . . 
C12 C 0.3318(3) 0.75331(14) 0.60630(12) 0.0355(7) Uani 1 1 d . . . 
C13 C 0.4266(3) 0.79349(19) 0.61577(14) 0.0545(10) Uani 1 1 d . . . 
H13 H 0.4853 0.7974 0.5884 0.065 Uiso 1 1 calc R . . 
C14 C 0.4355(4) 0.8270(2) 0.66384(17) 0.0622(12) Uani 1 1 d . . . 
H14 H 0.4994 0.8544 0.6690 0.075 Uiso 1 1 calc R . . 
C15 C 0.3516(3) 0.82138(15) 0.70562(13) 0.0401(8) Uani 1 1 d . . . 
C16 C 0.2588(2) 0.77938(13) 0.69775(12) 0.0281(6) Uani 1 1 d . . . 
C17 C 0.1787(2) 0.77237(13) 0.74210(11) 0.0291(6) Uani 1 1 d . . . 
H17 H 0.1163 0.7437 0.7385 0.035 Uiso 1 1 calc R . . 
C18 C 0.1898(3) 0.80605(13) 0.78968(11) 0.0344(6) Uani 1 1 d . . . 
H18 H 0.1356 0.8000 0.8188 0.041 Uiso 1 1 calc R . . 
C19 C 0.2797(3) 0.84932(16) 0.79624(13) 0.0423(8) Uani 1 1 d . . . 
H19 H 0.2850 0.8735 0.8290 0.051 Uiso 1 1 calc R . . 
C20 C 0.3590(3) 0.85645(17) 0.75534(15) 0.0508(9) Uani 1 1 d . . . 
H20 H 0.4207 0.8854 0.7600 0.061 Uiso 1 1 calc R . . 
C21 C 0.3710(3) 0.62252(14) 0.66467(11) 0.0306(6) Uani 1 1 d . . . 
H21 H 0.3671 0.6582 0.6878 0.037 Uiso 1 1 calc R . . 
C22 C 0.4768(3) 0.58967(14) 0.65954(11) 0.0302(6) Uani 1 1 d . . . 
C23 C 0.5820(3) 0.59703(17) 0.68705(13) 0.0426(8) Uani 1 1 d . . . 
H23 H 0.6007 0.6287 0.7130 0.051 Uiso 1 1 calc R . . 
C24 C 0.6545(3) 0.54932(17) 0.66938(14) 0.0444(8) Uani 1 1 d . . . 
H24 H 0.7320 0.5417 0.6811 0.053 Uiso 1 1 calc R . . 
C25 C 0.5912(2) 0.51496(15) 0.63126(12) 0.0375(7) Uani 1 1 d . . . 
H25 H 0.6203 0.4795 0.6122 0.045 Uiso 1 1 calc R . . 
C26 C 0.2314(3) 0.74073(16) 0.51895(13) 0.0452(9) Uani 1 1 d . . . 
H26A H 0.1615 0.7507 0.5403 0.068 Uiso 1 1 calc R . . 
H26B H 0.2133 0.7081 0.4920 0.068 Uiso 1 1 calc R . . 
H26C H 0.2583 0.7781 0.4996 0.068 Uiso 1 1 calc R . . 
C27 C 0.4280(3) 0.7063(2) 0.52612(15) 0.0668(12) Uani 1 1 d . . . 
H27A H 0.4575 0.7451 0.5100 0.100 Uiso 1 1 calc R . . 
H27B H 0.4124 0.6762 0.4966 0.100 Uiso 1 1 calc R . . 
H27C H 0.4860 0.6891 0.5515 0.100 Uiso 1 1 calc R . . 
C28 C 0.5988(2) 0.40357(12) 0.48272(11) 0.0242(5) Uani 1 1 d . . . 
C29 C 0.4999(2) 0.41183(12) 0.51413(10) 0.0231(6) Uani 1 1 d . . . 
C30 C 0.4787(3) 0.37251(13) 0.56029(11) 0.0289(6) Uani 1 1 d . . . 
H30 H 0.4118 0.3795 0.5824 0.035 Uiso 1 1 calc R . . 
C31 C 0.5523(2) 0.32486(13) 0.57359(11) 0.0284(6) Uani 1 1 d . . . 
H31 H 0.5352 0.2988 0.6042 0.034 Uiso 1 1 calc R . . 
C32 C 0.6531(3) 0.31417(13) 0.54224(11) 0.0272(6) Uani 1 1 d . . . 
C33 C 0.6776(2) 0.35422(12) 0.49663(10) 0.0242(6) Uani 1 1 d . . . 
C34 C 0.7806(3) 0.34305(13) 0.46644(12) 0.0306(6) Uani 1 1 d . . . 
H34 H 0.8001 0.3700 0.4367 0.037 Uiso 1 1 calc R . . 
C35 C 0.8527(3) 0.29475(14) 0.47874(13) 0.0369(7) Uani 1 1 d . . . 
H35 H 0.9210 0.2882 0.4575 0.044 Uiso 1 1 calc R . . 
C36 C 0.8266(3) 0.25452(14) 0.52276(13) 0.0388(8) Uani 1 1 d . . . 
H36 H 0.8764 0.2204 0.5307 0.047 Uiso 1 1 calc R . . 
C37 C 0.7299(3) 0.26416(14) 0.55427(13) 0.0352(7) Uani 1 1 d . . . 
H37 H 0.7139 0.2372 0.5845 0.042 Uiso 1 1 calc R . . 
C38 C 0.6235(2) 0.44336(13) 0.43276(11) 0.0245(6) Uani 1 1 d . . . 
C39 C 0.6605(2) 0.50424(14) 0.43776(11) 0.0313(6) Uani 1 1 d . . . 
C40 C 0.6752(3) 0.54157(15) 0.38944(14) 0.0433(8) Uani 1 1 d . . . 
H40 H 0.7021 0.5832 0.3931 0.052 Uiso 1 1 calc R . . 
C41 C 0.6511(3) 0.51850(17) 0.33815(14) 0.0417(8) Uani 1 1 d . . . 
H41 H 0.6600 0.5446 0.3067 0.050 Uiso 1 1 calc R . . 
C42 C 0.6135(3) 0.45663(15) 0.33113(12) 0.0341(7) Uani 1 1 d . . . 
C43 C 0.6009(2) 0.41830(13) 0.37865(11) 0.0276(6) Uani 1 1 d . . . 
C44 C 0.5620(3) 0.35657(15) 0.37074(12) 0.0396(8) Uani 1 1 d . . . 
H44 H 0.5510 0.3305 0.4020 0.047 Uiso 1 1 calc R . . 
C45 C 0.5400(4) 0.33351(18) 0.31930(14) 0.0558(11) Uani 1 1 d . . . 
H45 H 0.5153 0.2915 0.3150 0.067 Uiso 1 1 calc R . . 
C46 C 0.5537(4) 0.37169(19) 0.27268(14) 0.0617(12) Uani 1 1 d . . . 
H46 H 0.5377 0.3556 0.2369 0.074 Uiso 1 1 calc R . . 
C47 C 0.5894(3) 0.43109(18) 0.27859(13) 0.0482(9) Uani 1 1 d . . . 
H47 H 0.5986 0.4564 0.2467 0.058 Uiso 1 1 calc R . . 
C48 C 0.3817(2) 0.47873(12) 0.45849(11) 0.0250(6) Uani 1 1 d . . . 
H48 H 0.4156 0.4610 0.4263 0.030 Uiso 1 1 calc R . . 
C49 C 0.2961(3) 0.52530(11) 0.45274(11) 0.0270(5) Uani 1 1 d . . . 
C50 C 0.2408(3) 0.54617(15) 0.40480(13) 0.0405(8) Uani 1 1 d . . . 
H50 H 0.2600 0.5355 0.3678 0.049 Uiso 1 1 calc R . . 
C51 C 0.1524(3) 0.58548(16) 0.42167(16) 0.0548(9) Uani 1 1 d . . . 
H51 H 0.0989 0.6070 0.3986 0.066 Uiso 1 1 calc R . . 
C52 C 0.1573(3) 0.58729(16) 0.47909(15) 0.0440(8) Uani 1 1 d . . . 
H52 H 0.1058 0.6108 0.5016 0.053 Uiso 1 1 calc R . . 
C53 C 0.7976(4) 0.5162(3) 0.5110(2) 0.115(2) Uani 1 1 d . . . 
H53A H 0.8151 0.4717 0.5069 0.172 Uiso 1 1 calc R . . 
H53B H 0.8028 0.5278 0.5501 0.172 Uiso 1 1 calc R . . 
H53C H 0.8535 0.5407 0.4896 0.172 Uiso 1 1 calc R . . 
C54 C 0.6483(5) 0.59140(18) 0.50031(19) 0.0849(17) Uani 1 1 d . . . 
H54A H 0.7063 0.6196 0.4844 0.127 Uiso 1 1 calc R . . 
H54B H 0.6417 0.5992 0.5401 0.127 Uiso 1 1 calc R . . 
H54C H 0.5729 0.5987 0.4826 0.127 Uiso 1 1 calc R . . 
C55 C 0.2993(5) 0.3405(2) 0.7097(2) 0.0885(16) Uani 1 1 d . . . 
H55A H 0.2496 0.3061 0.6974 0.133 Uiso 1 1 calc R . . 
H55B H 0.3165 0.3356 0.7492 0.133 Uiso 1 1 calc R . . 
H55C H 0.3719 0.3401 0.6887 0.133 Uiso 1 1 calc R . . 
C56 C 0.0885(4) 0.4173(3) 0.74058(17) 0.0892(16) Uani 1 1 d . . . 
H56A H 0.0556 0.4594 0.7408 0.134 Uiso 1 1 calc R . . 
H56B H 0.1073 0.4048 0.7785 0.134 Uiso 1 1 calc R . . 
H56C H 0.0319 0.3881 0.7249 0.134 Uiso 1 1 calc R . . 
C57 C 0.3214(4) 0.4756(2) 0.73001(15) 0.0815(15) Uani 1 1 d . . . 
H57A H 0.3927 0.4787 0.7080 0.122 Uiso 1 1 calc R . . 
H57B H 0.3410 0.4629 0.7678 0.122 Uiso 1 1 calc R . . 
H57C H 0.2826 0.5163 0.7309 0.122 Uiso 1 1 calc R . . 
C58 C 0.1050(4) 0.30752(16) 0.59715(19) 0.0636(12) Uani 1 1 d . . . 
H58A H 0.1837 0.2937 0.5879 0.095 Uiso 1 1 calc R . . 
H58B H 0.0492 0.2879 0.5720 0.095 Uiso 1 1 calc R . . 
H58C H 0.0869 0.2955 0.6353 0.095 Uiso 1 1 calc R . . 
C59 C -0.0539(3) 0.41856(18) 0.60902(16) 0.0495(9) Uani 1 1 d . . . 
H59A H -0.0673 0.4105 0.6484 0.074 Uiso 1 1 calc R . . 
H59B H -0.1103 0.3950 0.5870 0.074 Uiso 1 1 calc R . . 
H59C H -0.0630 0.4632 0.6016 0.074 Uiso 1 1 calc R . . 
C60 C 0.1166(4) 0.4119(2) 0.51519(15) 0.0634(12) Uani 1 1 d . . . 
H60A H 0.1036 0.4565 0.5089 0.095 Uiso 1 1 calc R . . 
H60B H 0.0612 0.3878 0.4932 0.095 Uiso 1 1 calc R . . 
H60C H 0.1960 0.4010 0.5042 0.095 Uiso 1 1 calc R . . 
C61 C 0.2469(4) 0.3790(3) 0.3342(2) 0.074(2) Uani 0.731(7) 1 d PDU A 1 
H61A H 0.2691 0.4157 0.3126 0.112 Uiso 0.731(7) 1 calc PR A 1 
H61B H 0.2852 0.3420 0.3190 0.112 Uiso 0.731(7) 1 calc PR A 1 
H61C H 0.2707 0.3847 0.3727 0.112 Uiso 0.731(7) 1 calc PR A 1 
C62 C 0.1178(3) 0.3706(2) 0.33157(14) 0.0463(15) Uani 0.731(7) 1 d PGDU A 1 
C63 C 0.0419(4) 0.41765(14) 0.34751(15) 0.0502(16) Uani 0.731(7) 1 d PGDU A 1 
H63 H 0.0715 0.4563 0.3605 0.060 Uiso 0.731(7) 1 calc PR A 1 
C64 C -0.0773(4) 0.4082(2) 0.34450(16) 0.0519(15) Uani 0.731(7) 1 d PGDU A 1 
H64 H -0.1292 0.4403 0.3554 0.062 Uiso 0.731(7) 1 calc PR A 1 
C65 C -0.1207(3) 0.3516(3) 0.3255(2) 0.0524(18) Uani 0.731(7) 1 d PGDU A 1 
H65 H -0.2022 0.3451 0.3235 0.063 Uiso 0.731(7) 1 calc PR A 1 
C66 C -0.0448(4) 0.3046(2) 0.3096(3) 0.048(2) Uani 0.731(7) 1 d PGDU A 1 
H66 H -0.0744 0.2659 0.2967 0.058 Uiso 0.731(7) 1 calc PR A 1 
C67 C 0.0745(4) 0.31405(18) 0.3126(2) 0.0386(14) Uani 0.731(7) 1 d PGDU A 1 
H67 H 0.1263 0.2819 0.3017 0.046 Uiso 0.731(7) 1 calc PR A 1 
C68 C -0.0458(14) 0.4778(5) 0.3659(6) 0.085(6) Uani 0.269(7) 1 d PDU A 2 
H68A H -0.0493 0.5066 0.3345 0.127 Uiso 0.269(7) 1 calc PR A 2 
H68B H 0.0104 0.4932 0.3930 0.127 Uiso 0.269(7) 1 calc PR A 2 
H68C H -0.1227 0.4748 0.3831 0.127 Uiso 0.269(7) 1 calc PR A 2 
C69 C -0.0091(10) 0.4148(4) 0.3460(4) 0.043(4) Uani 0.269(7) 1 d PGDU A 2 
C70 C -0.0929(9) 0.3711(5) 0.3315(7) 0.040(4) Uani 0.269(7) 1 d PGDU A 2 
H70 H -0.1730 0.3814 0.3342 0.048 Uiso 0.269(7) 1 calc PR A 2 
C71 C -0.0596(12) 0.3125(5) 0.3130(8) 0.041(6) Uani 0.269(7) 1 d PGDU A 2 
H71 H -0.1169 0.2827 0.3031 0.049 Uiso 0.269(7) 1 calc PR A 2 
C72 C 0.0575(13) 0.2975(4) 0.3089(7) 0.052(5) Uani 0.269(7) 1 d PGDU A 2 
H72 H 0.0803 0.2574 0.2963 0.062 Uiso 0.269(7) 1 calc PR A 2 
C73 C 0.1413(9) 0.3411(6) 0.3234(5) 0.055(5) Uani 0.269(7) 1 d PGDU A 2 
H73 H 0.2214 0.3309 0.3207 0.065 Uiso 0.269(7) 1 calc PR A 2 
C74 C 0.1080(9) 0.3998(5) 0.3420(4) 0.055(5) Uani 0.269(7) 1 d PGDU A 2 
H74 H 0.1653 0.4296 0.3519 0.066 Uiso 0.269(7) 1 calc PR A 2 
  
loop_ 
 _atom_site_aniso_label 
 _atom_site_aniso_U_11 
 _atom_site_aniso_U_22 
 _atom_site_aniso_U_33 
 _atom_site_aniso_U_23 
 _atom_site_aniso_U_13 
 _atom_site_aniso_U_12 
Sm1 0.02501(6) 0.02448(6) 0.02347(6) -0.00223(5) 0.00194(5) -0.00240(5) 
Si1 0.0424(5) 0.0330(4) 0.0337(4) 0.0088(3) 0.0048(4) -0.0011(4) 
Si2 0.0316(4) 0.0291(4) 0.0425(5) 0.0018(4) 0.0030(4) -0.0078(3) 
N1 0.0285(13) 0.0314(13) 0.0213(11) -0.0022(9) 0.0038(9) -0.0018(10) 
N2 0.0388(15) 0.0461(15) 0.0254(12) -0.0047(11) 0.0086(11) 0.0012(12) 
N3 0.0271(12) 0.0363(13) 0.0273(12) -0.0062(10) -0.0018(10) 0.0014(10) 
N4 0.0251(11) 0.0233(11) 0.0239(11) 0.0014(9) -0.0035(9) 0.0005(9) 
N5 0.0638(19) 0.0235(12) 0.0406(15) -0.0031(10) -0.0153(14) -0.0010(13) 
N6 0.0349(13) 0.0225(12) 0.0344(14) -0.0006(10) -0.0012(11) 0.0051(10) 
N7 0.0270(12) 0.0256(11) 0.0347(12) 0.0037(9) 0.0058(11) -0.0021(12) 
C1 0.0252(13) 0.0301(14) 0.0160(12) -0.0032(10) 0.0045(10) -0.0017(11) 
C2 0.0281(15) 0.0317(14) 0.0180(12) -0.0054(10) 0.0043(10) -0.0012(11) 
C3 0.0363(17) 0.0315(16) 0.0286(15) -0.0032(12) 0.0064(13) -0.0075(13) 
C4 0.0323(16) 0.0377(17) 0.0280(15) -0.0100(12) 0.0017(12) -0.0075(13) 
C5 0.0290(15) 0.0440(18) 0.0179(13) -0.0028(12) -0.0015(11) 0.0004(13) 
C6 0.0284(14) 0.0360(16) 0.0153(12) -0.0012(11) 0.0001(11) 0.0009(12) 
C7 0.0372(17) 0.0338(16) 0.0249(15) -0.0005(12) -0.0033(13) 0.0029(14) 
C8 0.047(2) 0.0456(19) 0.0283(16) -0.0065(14) -0.0054(14) 0.0168(16) 
C9 0.0334(16) 0.065(2) 0.0291(15) -0.0070(14) -0.0074(15) 0.0120(19) 
C10 0.0291(17) 0.058(2) 0.0284(15) -0.0049(14) -0.0045(12) 0.0008(15) 
C11 0.0277(14) 0.0274(15) 0.0259(14) -0.0016(12) 0.0020(11) -0.0025(11) 
C12 0.0394(18) 0.0380(17) 0.0291(15) -0.0042(12) 0.0103(13) -0.0072(13) 
C13 0.046(2) 0.077(3) 0.0407(19) -0.0107(18) 0.0174(16) -0.032(2) 
C14 0.054(2) 0.076(3) 0.057(2) -0.016(2) 0.015(2) -0.043(2) 
C15 0.0376(17) 0.0434(19) 0.0395(18) -0.0066(15) 0.0027(14) -0.0170(14) 
C16 0.0292(14) 0.0294(15) 0.0257(14) -0.0017(11) 0.0024(11) -0.0038(11) 
C17 0.0275(15) 0.0317(14) 0.0280(14) -0.0044(11) 0.0022(12) -0.0020(12) 
C18 0.0345(16) 0.0440(16) 0.0247(14) -0.0075(12) 0.0031(13) 0.0018(16) 
C19 0.043(2) 0.0474(19) 0.0364(17) -0.0169(14) -0.0044(14) -0.0001(15) 
C20 0.050(2) 0.052(2) 0.050(2) -0.0169(17) -0.0002(17) -0.0237(17) 
C21 0.0354(16) 0.0322(16) 0.0243(14) -0.0051(12) -0.0004(12) -0.0003(13) 
C22 0.0333(16) 0.0319(16) 0.0253(14) -0.0016(12) -0.0037(12) 0.0005(13) 
C23 0.0403(19) 0.053(2) 0.0342(17) -0.0140(15) -0.0078(14) -0.0045(16) 
C24 0.0316(17) 0.061(2) 0.0405(19) -0.0022(16) -0.0142(14) -0.0004(15) 
C25 0.0315(15) 0.0433(18) 0.0375(16) -0.0027(14) -0.0007(12) 0.0049(14) 
C26 0.065(2) 0.0453(19) 0.0250(16) -0.0050(14) 0.0050(15) 0.0072(17) 
C27 0.046(2) 0.111(4) 0.043(2) -0.020(2) 0.0157(18) 0.007(2) 
C28 0.0270(14) 0.0246(14) 0.0209(13) -0.0038(10) -0.0031(11) -0.0013(11) 
C29 0.0309(15) 0.0211(13) 0.0173(12) -0.0031(10) -0.0041(11) 0.0002(11) 
C30 0.0346(16) 0.0293(15) 0.0228(13) -0.0003(11) -0.0013(12) -0.0046(12) 
C31 0.0371(15) 0.0270(14) 0.0211(14) 0.0027(11) -0.0075(11) -0.0037(11) 
C32 0.0344(15) 0.0227(14) 0.0245(14) -0.0033(11) -0.0088(11) -0.0011(11) 
C33 0.0288(15) 0.0217(12) 0.0220(12) -0.0020(10) -0.0049(11) 0.0001(11) 
C34 0.0350(17) 0.0282(14) 0.0287(14) -0.0049(11) -0.0043(12) 0.0023(12) 
C35 0.0363(16) 0.0319(16) 0.0424(18) -0.0089(14) -0.0022(14) 0.0046(13) 
C36 0.043(2) 0.0264(15) 0.0470(18) -0.0032(13) -0.0132(15) 0.0116(13) 
C37 0.0433(19) 0.0276(15) 0.0347(16) 0.0016(12) -0.0133(14) 0.0028(13) 
C38 0.0230(13) 0.0267(14) 0.0237(13) 0.0012(10) -0.0003(10) 0.0026(10) 
C39 0.0331(13) 0.0274(14) 0.0334(13) 0.0029(12) -0.0052(11) 0.0018(12) 
C40 0.045(2) 0.0315(16) 0.053(2) 0.0154(14) -0.0092(16) -0.0078(14) 
C41 0.0368(16) 0.052(2) 0.0367(17) 0.0203(15) 0.0013(13) 0.0012(14) 
C42 0.0337(17) 0.0429(18) 0.0255(15) 0.0056(13) 0.0036(13) 0.0080(14) 
C43 0.0273(14) 0.0309(15) 0.0246(14) 0.0008(11) 0.0004(11) 0.0079(12) 
C44 0.058(2) 0.0364(17) 0.0248(15) 0.0003(13) -0.0090(14) 0.0009(15) 
C45 0.086(3) 0.043(2) 0.038(2) -0.0119(16) -0.0252(19) 0.003(2) 
C46 0.102(3) 0.057(2) 0.0255(17) -0.0080(16) -0.0144(19) 0.012(2) 
C47 0.057(2) 0.064(2) 0.0241(15) 0.0069(15) 0.0022(15) 0.0160(19) 
C48 0.0254(13) 0.0257(14) 0.0239(13) -0.0016(10) 0.0017(10) -0.0016(11) 
C49 0.0315(14) 0.0215(12) 0.0281(13) 0.0006(10) -0.0046(12) 0.0001(12) 
C50 0.0511(19) 0.0386(17) 0.0318(18) 0.0039(13) -0.0081(14) 0.0072(14) 
C51 0.067(2) 0.050(2) 0.048(2) 0.0083(17) -0.0158(18) 0.0275(17) 
C52 0.0445(19) 0.0373(18) 0.050(2) -0.0039(15) -0.0075(16) 0.0157(15) 
C53 0.084(3) 0.152(5) 0.109(4) -0.078(4) -0.063(3) 0.047(4) 
C54 0.147(5) 0.042(2) 0.065(3) -0.018(2) -0.029(3) 0.027(3) 
C55 0.121(4) 0.065(3) 0.079(3) 0.015(2) -0.018(3) 0.029(3) 
C56 0.064(3) 0.157(5) 0.046(2) 0.015(3) 0.011(2) 0.006(3) 
C57 0.113(4) 0.095(3) 0.037(2) 0.021(2) -0.025(2) -0.045(3) 
C58 0.056(2) 0.0338(19) 0.102(4) -0.007(2) -0.009(2) -0.0056(17) 
C59 0.0311(18) 0.053(2) 0.065(2) -0.0012(18) -0.0027(16) -0.0005(16) 
C60 0.065(3) 0.084(3) 0.041(2) -0.002(2) -0.0028(19) -0.040(2) 
C61 0.049(3) 0.059(4) 0.115(5) -0.014(3) 0.004(3) -0.003(3) 
C62 0.041(3) 0.044(4) 0.055(3) 0.005(3) 0.002(2) 0.004(3) 
C63 0.042(4) 0.046(3) 0.062(3) -0.004(3) 0.012(3) 0.009(3) 
C64 0.046(3) 0.057(4) 0.053(3) 0.003(3) 0.013(3) 0.009(3) 
C65 0.045(3) 0.071(5) 0.041(3) 0.004(3) 0.010(3) 0.010(3) 
C66 0.050(4) 0.058(4) 0.038(4) 0.006(3) 0.003(3) 0.006(3) 
C67 0.039(3) 0.041(3) 0.036(3) 0.012(2) 0.002(2) 0.004(3) 
C68 0.085(9) 0.073(9) 0.096(9) -0.011(7) -0.002(7) 0.002(7) 
C69 0.036(8) 0.042(7) 0.050(7) 0.007(5) 0.011(6) 0.004(6) 
C70 0.055(8) 0.028(7) 0.037(7) 0.000(6) 0.005(6) 0.009(6) 
C71 0.048(9) 0.033(7) 0.040(9) 0.001(6) 0.009(7) -0.003(7) 
C72 0.056(9) 0.052(8) 0.047(8) -0.001(6) 0.005(7) -0.004(7) 
C73 0.057(8) 0.053(8) 0.053(7) 0.004(6) 0.020(6) 0.006(7) 
C74 0.048(8) 0.046(8) 0.071(8) -0.008(7) 0.006(7) -0.007(7) 
  
_geom_special_details 
; 
 All esds (except the esd in the dihedral angle between two l.s. planes) 
 are estimated using the full covariance matrix.  The cell esds are taken 
 into account individually in the estimation of esds in distances, angles 
 and torsion angles; correlations between esds in cell parameters are only 
 used when they are defined by crystal symmetry.  An approximate (isotropic) 
 treatment of cell esds is used for estimating esds involving l.s. planes. 
; 
  
loop_ 
 _geom_bond_atom_site_label_1 
 _geom_bond_atom_site_label_2 
 _geom_bond_distance 
 _geom_bond_site_symmetry_2 
 _geom_bond_publ_flag 
Sm1 N7 2.258(2) . ? 
Sm1 N3 2.376(2) . ? 
Sm1 N6 2.402(2) . ? 
Sm1 N1 2.476(2) . ? 
Sm1 N4 2.497(2) . ? 
Sm1 Si2 3.4070(9) . ? 
Si1 N7 1.732(2) . ? 
Si1 C56 1.849(4) . ? 
Si1 C57 1.873(4) . ? 
Si1 C55 1.878(4) . ? 
Si2 N7 1.730(3) . ? 
Si2 C59 1.861(3) . ? 
Si2 C58 1.862(4) . ? 
Si2 C60 1.873(4) . ? 
N1 C21 1.306(4) . ? 
N1 C2 1.420(3) . ? 
N2 C12 1.428(4) . ? 
N2 C27 1.447(4) . ? 
N2 C26 1.451(4) . ? 
N3 C25 1.350(4) . ? 
N3 C22 1.394(4) . ? 
N4 C48 1.304(3) . ? 
N4 C29 1.421(3) . ? 
N5 C39 1.418(4) . ? 
N5 C53 1.424(5) . ? 
N5 C54 1.431(4) . ? 
N6 C52 1.344(4) . ? 
N6 C49 1.383(4) . ? 
C1 C2 1.394(4) . ? 
C1 C6 1.435(4) . ? 
C1 C11 1.490(4) . ? 
C2 C3 1.418(4) . ? 
C3 C4 1.360(4) . ? 
C3 H3 0.9500 . ? 
C4 C5 1.407(4) . ? 
C4 H4 0.9500 . ? 
C5 C10 1.418(4) . ? 
C5 C6 1.425(4) . ? 
C6 C7 1.422(4) . ? 
C7 C8 1.370(4) . ? 
C7 H7 0.9500 . ? 
C8 C9 1.402(5) . ? 
C8 H8 0.9500 . ? 
C9 C10 1.367(5) . ? 
C9 H9 0.9500 . ? 
C10 H10 0.9500 . ? 
C11 C12 1.388(4) . ? 
C11 C16 1.432(4) . ? 
C12 C13 1.409(4) . ? 
C13 C14 1.371(5) . ? 
C13 H13 0.9500 . ? 
C14 C15 1.403(5) . ? 
C14 H14 0.9500 . ? 
C15 C16 1.411(4) . ? 
C15 C20 1.422(4) . ? 
C16 C17 1.423(4) . ? 
C17 C18 1.365(4) . ? 
C17 H17 0.9500 . ? 
C18 C19 1.399(4) . ? 
C18 H18 0.9500 . ? 
C19 C20 1.356(5) . ? 
C19 H19 0.9500 . ? 
C20 H20 0.9500 . ? 
C21 C22 1.413(4) . ? 
C21 H21 0.9500 . ? 
C22 C23 1.392(4) . ? 
C23 C24 1.388(5) . ? 
C23 H23 0.9500 . ? 
C24 C25 1.388(4) . ? 
C24 H24 0.9500 . ? 
C25 H25 0.9500 . ? 
C26 H26A 0.9800 . ? 
C26 H26B 0.9800 . ? 
C26 H26C 0.9800 . ? 
C27 H27A 0.9800 . ? 
C27 H27B 0.9800 . ? 
C27 H27C 0.9800 . ? 
C28 C29 1.380(4) . ? 
C28 C33 1.435(4) . ? 
C28 C38 1.507(4) . ? 
C29 C30 1.421(4) . ? 
C30 C31 1.367(4) . ? 
C30 H30 0.9500 . ? 
C31 C32 1.406(4) . ? 
C31 H31 0.9500 . ? 
C32 C37 1.421(4) . ? 
C32 C33 1.427(4) . ? 
C33 C34 1.414(4) . ? 
C34 C35 1.361(4) . ? 
C34 H34 0.9500 . ? 
C35 C36 1.404(4) . ? 
C35 H35 0.9500 . ? 
C36 C37 1.365(4) . ? 
C36 H36 0.9500 . ? 
C37 H37 0.9500 . ? 
C38 C39 1.379(4) . ? 
C38 C43 1.439(4) . ? 
C39 C40 1.427(4) . ? 
C40 C41 1.365(5) . ? 
C40 H40 0.9500 . ? 
C41 C42 1.407(5) . ? 
C41 H41 0.9500 . ? 
C42 C47 1.412(4) . ? 
C42 C43 1.421(4) . ? 
C43 C44 1.411(4) . ? 
C44 C45 1.364(4) . ? 
C44 H44 0.9500 . ? 
C45 C46 1.403(5) . ? 
C45 H45 0.9500 . ? 
C46 C47 1.347(5) . ? 
C46 H46 0.9500 . ? 
C47 H47 0.9500 . ? 
C48 C49 1.411(4) . ? 
C48 H48 0.9500 . ? 
C49 C50 1.398(4) . ? 
C50 C51 1.383(5) . ? 
C50 H50 0.9500 . ? 
C51 C52 1.391(5) . ? 
C51 H51 0.9500 . ? 
C52 H52 0.9500 . ? 
C53 H53A 0.9800 . ? 
C53 H53B 0.9800 . ? 
C53 H53C 0.9800 . ? 
C54 H54A 0.9800 . ? 
C54 H54B 0.9800 . ? 
C54 H54C 0.9800 . ? 
C55 H55A 0.9800 . ? 
C55 H55B 0.9800 . ? 
C55 H55C 0.9800 . ? 
C56 H56A 0.9800 . ? 
C56 H56B 0.9800 . ? 
C56 H56C 0.9800 . ? 
C57 H57A 0.9800 . ? 
C57 H57B 0.9800 . ? 
C57 H57C 0.9800 . ? 
C58 H58A 0.9800 . ? 
C58 H58B 0.9800 . ? 
C58 H58C 0.9800 . ? 
C59 H59A 0.9800 . ? 
C59 H59B 0.9800 . ? 
C59 H59C 0.9800 . ? 
C60 H60A 0.9800 . ? 
C60 H60B 0.9800 . ? 
C60 H60C 0.9800 . ? 
C61 C62 1.498(5) . ? 
C61 H61A 0.9800 . ? 
C61 H61B 0.9800 . ? 
C61 H61C 0.9800 . ? 
C62 C63 1.3900 . ? 
C62 C67 1.3900 . ? 
C63 C64 1.3900 . ? 
C63 H63 0.9500 . ? 
C64 C65 1.3900 . ? 
C64 H64 0.9500 . ? 
C65 C66 1.3900 . ? 
C65 H65 0.9500 . ? 
C66 C67 1.3900 . ? 
C66 H66 0.9500 . ? 
C67 H67 0.9500 . ? 
C68 C69 1.496(8) . ? 
C68 H68A 0.9800 . ? 
C68 H68B 0.9800 . ? 
C68 H68C 0.9800 . ? 
C69 C70 1.3900 . ? 
C69 C74 1.3900 . ? 
C70 C71 1.3900 . ? 
C70 H70 0.9500 . ? 
C71 C72 1.3900 . ? 
C71 H71 0.9500 . ? 
C72 C73 1.3900 . ? 
C72 H72 0.9500 . ? 
C73 C74 1.3900 . ? 
C73 H73 0.9500 . ? 
C74 H74 0.9500 . ? 
  
loop_ 
 _geom_angle_atom_site_label_1 
 _geom_angle_atom_site_label_2 
 _geom_angle_atom_site_label_3 
 _geom_angle 
 _geom_angle_site_symmetry_1 
 _geom_angle_site_symmetry_3 
 _geom_angle_publ_flag 
N7 Sm1 N3 118.17(9) . . ? 
N7 Sm1 N6 122.71(8) . . ? 
N3 Sm1 N6 119.08(9) . . ? 
N7 Sm1 N1 106.80(8) . . ? 
N3 Sm1 N1 69.57(8) . . ? 
N6 Sm1 N1 94.36(8) . . ? 
N7 Sm1 N4 110.23(8) . . ? 
N3 Sm1 N4 88.44(8) . . ? 
N6 Sm1 N4 69.76(8) . . ? 
N1 Sm1 N4 142.63(7) . . ? 
N7 Sm1 Si2 26.96(6) . . ? 
N3 Sm1 Si2 142.93(6) . . ? 
N6 Sm1 Si2 96.73(6) . . ? 
N1 Sm1 Si2 120.01(6) . . ? 
N4 Sm1 Si2 95.91(5) . . ? 
N7 Si1 C56 114.10(17) . . ? 
N7 Si1 C57 110.79(14) . . ? 
C56 Si1 C57 105.9(2) . . ? 
N7 Si1 C55 112.89(18) . . ? 
C56 Si1 C55 108.6(3) . . ? 
C57 Si1 C55 103.9(2) . . ? 
N7 Si2 C59 111.65(15) . . ? 
N7 Si2 C58 113.02(16) . . ? 
C59 Si2 C58 108.35(18) . . ? 
N7 Si2 C60 109.67(14) . . ? 
C59 Si2 C60 107.22(19) . . ? 
C58 Si2 C60 106.7(2) . . ? 
N7 Si2 Sm1 36.29(7) . . ? 
C59 Si2 Sm1 117.22(12) . . ? 
C58 Si2 Sm1 132.06(13) . . ? 
C60 Si2 Sm1 74.08(12) . . ? 
C21 N1 C2 125.3(2) . . ? 
C21 N1 Sm1 114.50(18) . . ? 
C2 N1 Sm1 120.21(17) . . ? 
C12 N2 C27 116.9(3) . . ? 
C12 N2 C26 114.8(2) . . ? 
C27 N2 C26 111.0(3) . . ? 
C25 N3 C22 105.6(2) . . ? 
C25 N3 Sm1 138.1(2) . . ? 
C22 N3 Sm1 115.20(18) . . ? 
C48 N4 C29 122.8(2) . . ? 
C48 N4 Sm1 113.44(17) . . ? 
C29 N4 Sm1 123.54(16) . . ? 
C39 N5 C53 114.3(3) . . ? 
C39 N5 C54 115.5(3) . . ? 
C53 N5 C54 112.4(4) . . ? 
C52 N6 C49 105.8(3) . . ? 
C52 N6 Sm1 138.4(2) . . ? 
C49 N6 Sm1 114.18(17) . . ? 
Si2 N7 Si1 122.18(13) . . ? 
Si2 N7 Sm1 116.75(12) . . ? 
Si1 N7 Sm1 121.07(12) . . ? 
C2 C1 C6 118.6(2) . . ? 
C2 C1 C11 122.3(2) . . ? 
C6 C1 C11 119.1(2) . . ? 
C1 C2 C3 119.7(3) . . ? 
C1 C2 N1 126.6(2) . . ? 
C3 C2 N1 113.5(2) . . ? 
C4 C3 C2 121.8(3) . . ? 
C4 C3 H3 119.1 . . ? 
C2 C3 H3 119.1 . . ? 
C3 C4 C5 120.9(3) . . ? 
C3 C4 H4 119.6 . . ? 
C5 C4 H4 119.6 . . ? 
C4 C5 C10 121.9(3) . . ? 
C4 C5 C6 118.4(3) . . ? 
C10 C5 C6 119.6(3) . . ? 
C7 C6 C5 117.4(3) . . ? 
C7 C6 C1 122.0(3) . . ? 
C5 C6 C1 120.6(3) . . ? 
C8 C7 C6 121.6(3) . . ? 
C8 C7 H7 119.2 . . ? 
C6 C7 H7 119.2 . . ? 
C7 C8 C9 120.3(3) . . ? 
C7 C8 H8 119.9 . . ? 
C9 C8 H8 119.9 . . ? 
C10 C9 C8 120.2(3) . . ? 
C10 C9 H9 119.9 . . ? 
C8 C9 H9 119.9 . . ? 
C9 C10 C5 120.7(3) . . ? 
C9 C10 H10 119.6 . . ? 
C5 C10 H10 119.6 . . ? 
C12 C11 C16 119.2(3) . . ? 
C12 C11 C1 120.9(3) . . ? 
C16 C11 C1 119.9(2) . . ? 
C11 C12 C13 119.7(3) . . ? 
C11 C12 N2 119.1(3) . . ? 
C13 C12 N2 121.2(3) . . ? 
C14 C13 C12 121.1(3) . . ? 
C14 C13 H13 119.5 . . ? 
C12 C13 H13 119.5 . . ? 
C13 C14 C15 121.0(3) . . ? 
C13 C14 H14 119.5 . . ? 
C15 C14 H14 119.5 . . ? 
C14 C15 C16 118.6(3) . . ? 
C14 C15 C20 121.5(3) . . ? 
C16 C15 C20 119.9(3) . . ? 
C15 C16 C17 117.2(3) . . ? 
C15 C16 C11 120.3(3) . . ? 
C17 C16 C11 122.5(3) . . ? 
C18 C17 C16 121.3(3) . . ? 
C18 C17 H17 119.4 . . ? 
C16 C17 H17 119.4 . . ? 
C17 C18 C19 121.1(3) . . ? 
C17 C18 H18 119.5 . . ? 
C19 C18 H18 119.5 . . ? 
C20 C19 C18 119.4(3) . . ? 
C20 C19 H19 120.3 . . ? 
C18 C19 H19 120.3 . . ? 
C19 C20 C15 121.2(3) . . ? 
C19 C20 H20 119.4 . . ? 
C15 C20 H20 119.4 . . ? 
N1 C21 C22 120.7(3) . . ? 
N1 C21 H21 119.7 . . ? 
C22 C21 H21 119.7 . . ? 
C23 C22 N3 109.5(3) . . ? 
C23 C22 C21 130.7(3) . . ? 
N3 C22 C21 119.6(3) . . ? 
C24 C23 C22 107.0(3) . . ? 
C24 C23 H23 126.5 . . ? 
C22 C23 H23 126.5 . . ? 
C25 C24 C23 106.3(3) . . ? 
C25 C24 H24 126.8 . . ? 
C23 C24 H24 126.8 . . ? 
N3 C25 C24 111.6(3) . . ? 
N3 C25 H25 124.2 . . ? 
C24 C25 H25 124.2 . . ? 
N2 C26 H26A 109.5 . . ? 
N2 C26 H26B 109.5 . . ? 
H26A C26 H26B 109.5 . . ? 
N2 C26 H26C 109.5 . . ? 
H26A C26 H26C 109.5 . . ? 
H26B C26 H26C 109.5 . . ? 
N2 C27 H27A 109.5 . . ? 
N2 C27 H27B 109.5 . . ? 
H27A C27 H27B 109.5 . . ? 
N2 C27 H27C 109.5 . . ? 
H27A C27 H27C 109.5 . . ? 
H27B C27 H27C 109.5 . . ? 
C29 C28 C33 119.2(2) . . ? 
C29 C28 C38 121.7(2) . . ? 
C33 C28 C38 119.1(2) . . ? 
C28 C29 N4 126.2(2) . . ? 
C28 C29 C30 119.9(3) . . ? 
N4 C29 C30 113.9(2) . . ? 
C31 C30 C29 121.5(3) . . ? 
C31 C30 H30 119.2 . . ? 
C29 C30 H30 119.2 . . ? 
C30 C31 C32 120.5(3) . . ? 
C30 C31 H31 119.8 . . ? 
C32 C31 H31 119.8 . . ? 
C31 C32 C37 121.8(3) . . ? 
C31 C32 C33 118.8(2) . . ? 
C37 C32 C33 119.4(3) . . ? 
C34 C33 C32 117.6(2) . . ? 
C34 C33 C28 122.3(2) . . ? 
C32 C33 C28 120.1(2) . . ? 
C35 C34 C33 121.9(3) . . ? 
C35 C34 H34 119.1 . . ? 
C33 C34 H34 119.1 . . ? 
C34 C35 C36 120.3(3) . . ? 
C34 C35 H35 119.9 . . ? 
C36 C35 H35 119.9 . . ? 
C37 C36 C35 120.4(3) . . ? 
C37 C36 H36 119.8 . . ? 
C35 C36 H36 119.8 . . ? 
C36 C37 C32 120.5(3) . . ? 
C36 C37 H37 119.8 . . ? 
C32 C37 H37 119.8 . . ? 
C39 C38 C43 119.3(2) . . ? 
C39 C38 C28 121.6(2) . . ? 
C43 C38 C28 118.9(2) . . ? 
C38 C39 N5 118.7(2) . . ? 
C38 C39 C40 119.8(3) . . ? 
N5 C39 C40 121.5(3) . . ? 
C41 C40 C39 121.2(3) . . ? 
C41 C40 H40 119.4 . . ? 
C39 C40 H40 119.4 . . ? 
C40 C41 C42 121.0(3) . . ? 
C40 C41 H41 119.5 . . ? 
C42 C41 H41 119.5 . . ? 
C41 C42 C47 122.4(3) . . ? 
C41 C42 C43 118.7(3) . . ? 
C47 C42 C43 118.9(3) . . ? 
C44 C43 C42 117.8(3) . . ? 
C44 C43 C38 122.1(2) . . ? 
C42 C43 C38 120.1(3) . . ? 
C45 C44 C43 121.6(3) . . ? 
C45 C44 H44 119.2 . . ? 
C43 C44 H44 119.2 . . ? 
C44 C45 C46 120.1(4) . . ? 
C44 C45 H45 120.0 . . ? 
C46 C45 H45 120.0 . . ? 
C47 C46 C45 120.1(3) . . ? 
C47 C46 H46 119.9 . . ? 
C45 C46 H46 119.9 . . ? 
C46 C47 C42 121.5(3) . . ? 
C46 C47 H47 119.2 . . ? 
C42 C47 H47 119.2 . . ? 
N4 C48 C49 121.5(2) . . ? 
N4 C48 H48 119.3 . . ? 
C49 C48 H48 119.3 . . ? 
N6 C49 C50 109.7(3) . . ? 
N6 C49 C48 120.9(2) . . ? 
C50 C49 C48 128.9(3) . . ? 
C51 C50 C49 106.6(3) . . ? 
C51 C50 H50 126.7 . . ? 
C49 C50 H50 126.7 . . ? 
C50 C51 C52 106.4(3) . . ? 
C50 C51 H51 126.8 . . ? 
C52 C51 H51 126.8 . . ? 
N6 C52 C51 111.4(3) . . ? 
N6 C52 H52 124.3 . . ? 
C51 C52 H52 124.3 . . ? 
N5 C53 H53A 109.5 . . ? 
N5 C53 H53B 109.5 . . ? 
H53A C53 H53B 109.5 . . ? 
N5 C53 H53C 109.5 . . ? 
H53A C53 H53C 109.5 . . ? 
H53B C53 H53C 109.5 . . ? 
N5 C54 H54A 109.5 . . ? 
N5 C54 H54B 109.5 . . ? 
H54A C54 H54B 109.5 . . ? 
N5 C54 H54C 109.5 . . ? 
H54A C54 H54C 109.5 . . ? 
H54B C54 H54C 109.5 . . ? 
Si1 C55 H55A 109.5 . . ? 
Si1 C55 H55B 109.5 . . ? 
H55A C55 H55B 109.5 . . ? 
Si1 C55 H55C 109.5 . . ? 
H55A C55 H55C 109.5 . . ? 
H55B C55 H55C 109.5 . . ? 
Si1 C56 H56A 109.5 . . ? 
Si1 C56 H56B 109.5 . . ? 
H56A C56 H56B 109.5 . . ? 
Si1 C56 H56C 109.5 . . ? 
H56A C56 H56C 109.5 . . ? 
H56B C56 H56C 109.5 . . ? 
Si1 C57 H57A 109.5 . . ? 
Si1 C57 H57B 109.5 . . ? 
H57A C57 H57B 109.5 . . ? 
Si1 C57 H57C 109.5 . . ? 
H57A C57 H57C 109.5 . . ? 
H57B C57 H57C 109.5 . . ? 
Si2 C58 H58A 109.5 . . ? 
Si2 C58 H58B 109.5 . . ? 
H58A C58 H58B 109.5 . . ? 
Si2 C58 H58C 109.5 . . ? 
H58A C58 H58C 109.5 . . ? 
H58B C58 H58C 109.5 . . ? 
Si2 C59 H59A 109.5 . . ? 
Si2 C59 H59B 109.5 . . ? 
H59A C59 H59B 109.5 . . ? 
Si2 C59 H59C 109.5 . . ? 
H59A C59 H59C 109.5 . . ? 
H59B C59 H59C 109.5 . . ? 
Si2 C60 H60A 109.5 . . ? 
Si2 C60 H60B 109.5 . . ? 
H60A C60 H60B 109.5 . . ? 
Si2 C60 H60C 109.5 . . ? 
H60A C60 H60C 109.5 . . ? 
H60B C60 H60C 109.5 . . ? 
C63 C62 C67 120.0 . . ? 
C63 C62 C61 121.6(4) . . ? 
C67 C62 C61 118.4(4) . . ? 
C64 C63 C62 120.0 . . ? 
C64 C63 H63 120.0 . . ? 
C62 C63 H63 120.0 . . ? 
C65 C64 C63 120.0 . . ? 
C65 C64 H64 120.0 . . ? 
C63 C64 H64 120.0 . . ? 
C66 C65 C64 120.0 . . ? 
C66 C65 H65 120.0 . . ? 
C64 C65 H65 120.0 . . ? 
C65 C66 C67 120.0 . . ? 
C65 C66 H66 120.0 . . ? 
C67 C66 H66 120.0 . . ? 
C66 C67 C62 120.0 . . ? 
C66 C67 H67 120.0 . . ? 
C62 C67 H67 120.0 . . ? 
C69 C68 H68A 109.5 . . ? 
C69 C68 H68B 109.5 . . ? 
H68A C68 H68B 109.5 . . ? 
C69 C68 H68C 109.5 . . ? 
H68A C68 H68C 109.5 . . ? 
H68B C68 H68C 109.5 . . ? 
C70 C69 C74 120.0 . . ? 
C70 C69 C68 119.6(7) . . ? 
C74 C69 C68 120.4(7) . . ? 
C69 C70 C71 120.0 . . ? 
C69 C70 H70 120.0 . . ? 
C71 C70 H70 120.0 . . ? 
C72 C71 C70 120.0 . . ? 
C72 C71 H71 120.0 . . ? 
C70 C71 H71 120.0 . . ? 
C73 C72 C71 120.0 . . ? 
C73 C72 H72 120.0 . . ? 
C71 C72 H72 120.0 . . ? 
C72 C73 C74 120.0 . . ? 
C72 C73 H73 120.0 . . ? 
C74 C73 H73 120.0 . . ? 
C73 C74 C69 120.0 . . ? 
C73 C74 H74 120.0 . . ? 
C69 C74 H74 120.0 . . ? 
  
loop_ 
 _geom_torsion_atom_site_label_1 
 _geom_torsion_atom_site_label_2 
 _geom_torsion_atom_site_label_3 
 _geom_torsion_atom_site_label_4 
 _geom_torsion 
 _geom_torsion_site_symmetry_1 
 _geom_torsion_site_symmetry_2 
 _geom_torsion_site_symmetry_3 
 _geom_torsion_site_symmetry_4 
 _geom_torsion_publ_flag 
N3 Sm1 Si2 N7 29.01(17) . . . . ? 
N6 Sm1 Si2 N7 -165.48(14) . . . . ? 
N1 Sm1 Si2 N7 -66.47(15) . . . . ? 
N4 Sm1 Si2 N7 124.27(14) . . . . ? 
N7 Sm1 Si2 C59 90.0(2) . . . . ? 
N3 Sm1 Si2 C59 119.03(17) . . . . ? 
N6 Sm1 Si2 C59 -75.46(15) . . . . ? 
N1 Sm1 Si2 C59 23.55(15) . . . . ? 
N4 Sm1 Si2 C59 -145.70(15) . . . . ? 
N7 Sm1 Si2 C58 -70.2(2) . . . . ? 
N3 Sm1 Si2 C58 -41.2(2) . . . . ? 
N6 Sm1 Si2 C58 124.3(2) . . . . ? 
N1 Sm1 Si2 C58 -136.7(2) . . . . ? 
N4 Sm1 Si2 C58 54.1(2) . . . . ? 
N7 Sm1 Si2 C60 -168.5(2) . . . . ? 
N3 Sm1 Si2 C60 -139.46(19) . . . . ? 
N6 Sm1 Si2 C60 26.04(17) . . . . ? 
N1 Sm1 Si2 C60 125.05(17) . . . . ? 
N4 Sm1 Si2 C60 -44.20(17) . . . . ? 
N7 Sm1 N1 C21 109.5(2) . . . . ? 
N3 Sm1 N1 C21 -4.98(19) . . . . ? 
N6 Sm1 N1 C21 -124.4(2) . . . . ? 
N4 Sm1 N1 C21 -62.6(2) . . . . ? 
Si2 Sm1 N1 C21 135.20(18) . . . . ? 
N7 Sm1 N1 C2 -69.9(2) . . . . ? 
N3 Sm1 N1 C2 175.6(2) . . . . ? 
N6 Sm1 N1 C2 56.16(19) . . . . ? 
N4 Sm1 N1 C2 118.01(19) . . . . ? 
Si2 Sm1 N1 C2 -44.2(2) . . . . ? 
N7 Sm1 N3 C25 72.6(3) . . . . ? 
N6 Sm1 N3 C25 -105.3(3) . . . . ? 
N1 Sm1 N3 C25 171.3(3) . . . . ? 
N4 Sm1 N3 C25 -39.6(3) . . . . ? 
Si2 Sm1 N3 C25 58.2(3) . . . . ? 
N7 Sm1 N3 C22 -93.1(2) . . . . ? 
N6 Sm1 N3 C22 89.0(2) . . . . ? 
N1 Sm1 N3 C22 5.55(19) . . . . ? 
N4 Sm1 N3 C22 154.7(2) . . . . ? 
Si2 Sm1 N3 C22 -107.5(2) . . . . ? 
N7 Sm1 N4 C48 114.11(18) . . . . ? 
N3 Sm1 N4 C48 -126.33(19) . . . . ? 
N6 Sm1 N4 C48 -4.44(18) . . . . ? 
N1 Sm1 N4 C48 -74.0(2) . . . . ? 
Si2 Sm1 N4 C48 90.57(18) . . . . ? 
N7 Sm1 N4 C29 -60.1(2) . . . . ? 
N3 Sm1 N4 C29 59.5(2) . . . . ? 
N6 Sm1 N4 C29 -178.7(2) . . . . ? 
N1 Sm1 N4 C29 111.8(2) . . . . ? 
Si2 Sm1 N4 C29 -83.64(19) . . . . ? 
N7 Sm1 N6 C52 65.4(3) . . . . ? 
N3 Sm1 N6 C52 -116.8(3) . . . . ? 
N1 Sm1 N6 C52 -47.8(3) . . . . ? 
N4 Sm1 N6 C52 167.0(3) . . . . ? 
Si2 Sm1 N6 C52 73.1(3) . . . . ? 
N7 Sm1 N6 C49 -97.6(2) . . . . ? 
N3 Sm1 N6 C49 80.2(2) . . . . ? 
N1 Sm1 N6 C49 149.20(19) . . . . ? 
N4 Sm1 N6 C49 3.98(18) . . . . ? 
Si2 Sm1 N6 C49 -89.87(19) . . . . ? 
C59 Si2 N7 Si1 72.6(2) . . . . ? 
C58 Si2 N7 Si1 -49.8(2) . . . . ? 
C60 Si2 N7 Si1 -168.7(2) . . . . ? 
Sm1 Si2 N7 Si1 179.5(2) . . . . ? 
C59 Si2 N7 Sm1 -106.92(17) . . . . ? 
C58 Si2 N7 Sm1 130.62(18) . . . . ? 
C60 Si2 N7 Sm1 11.8(2) . . . . ? 
C56 Si1 N7 Si2 -51.0(3) . . . . ? 
C57 Si1 N7 Si2 -170.3(2) . . . . ? 
C55 Si1 N7 Si2 73.7(3) . . . . ? 
C56 Si1 N7 Sm1 128.5(2) . . . . ? 
C57 Si1 N7 Sm1 9.2(2) . . . . ? 
C55 Si1 N7 Sm1 -106.8(2) . . . . ? 
N3 Sm1 N7 Si2 -160.63(11) . . . . ? 
N6 Sm1 N7 Si2 17.21(17) . . . . ? 
N1 Sm1 N7 Si2 123.97(12) . . . . ? 
N4 Sm1 N7 Si2 -61.17(14) . . . . ? 
N3 Sm1 N7 Si1 19.83(17) . . . . ? 
N6 Sm1 N7 Si1 -162.33(12) . . . . ? 
N1 Sm1 N7 Si1 -55.57(15) . . . . ? 
N4 Sm1 N7 Si1 119.30(13) . . . . ? 
Si2 Sm1 N7 Si1 -179.5(2) . . . . ? 
C6 C1 C2 C3 -1.0(4) . . . . ? 
C11 C1 C2 C3 179.2(2) . . . . ? 
C6 C1 C2 N1 174.0(2) . . . . ? 
C11 C1 C2 N1 -5.9(4) . . . . ? 
C21 N1 C2 C1 35.2(4) . . . . ? 
Sm1 N1 C2 C1 -145.5(2) . . . . ? 
C21 N1 C2 C3 -149.6(3) . . . . ? 
Sm1 N1 C2 C3 29.8(3) . . . . ? 
C1 C2 C3 C4 0.3(4) . . . . ? 
N1 C2 C3 C4 -175.3(3) . . . . ? 
C2 C3 C4 C5 -0.2(4) . . . . ? 
C3 C4 C5 C10 -178.2(3) . . . . ? 
C3 C4 C5 C6 0.7(4) . . . . ? 
C4 C5 C6 C7 177.8(2) . . . . ? 
C10 C5 C6 C7 -3.3(4) . . . . ? 
C4 C5 C6 C1 -1.4(4) . . . . ? 
C10 C5 C6 C1 177.5(3) . . . . ? 
C2 C1 C6 C7 -177.6(2) . . . . ? 
C11 C1 C6 C7 2.3(4) . . . . ? 
C2 C1 C6 C5 1.6(4) . . . . ? 
C11 C1 C6 C5 -178.6(2) . . . . ? 
C5 C6 C7 C8 2.2(4) . . . . ? 
C1 C6 C7 C8 -178.6(3) . . . . ? 
C6 C7 C8 C9 0.5(4) . . . . ? 
C7 C8 C9 C10 -2.0(4) . . . . ? 
C8 C9 C10 C5 0.9(4) . . . . ? 
C4 C5 C10 C9 -179.2(3) . . . . ? 
C6 C5 C10 C9 1.8(4) . . . . ? 
C2 C1 C11 C12 68.4(4) . . . . ? 
C6 C1 C11 C12 -111.5(3) . . . . ? 
C2 C1 C11 C16 -111.0(3) . . . . ? 
C6 C1 C11 C16 69.2(4) . . . . ? 
C16 C11 C12 C13 3.0(5) . . . . ? 
C1 C11 C12 C13 -176.3(3) . . . . ? 
C16 C11 C12 N2 -179.7(3) . . . . ? 
C1 C11 C12 N2 1.0(4) . . . . ? 
C27 N2 C12 C11 -152.8(3) . . . . ? 
C26 N2 C12 C11 74.7(4) . . . . ? 
C27 N2 C12 C13 24.5(5) . . . . ? 
C26 N2 C12 C13 -108.1(4) . . . . ? 
C11 C12 C13 C14 -3.5(6) . . . . ? 
N2 C12 C13 C14 179.3(4) . . . . ? 
C12 C13 C14 C15 1.2(7) . . . . ? 
C13 C14 C15 C16 1.4(6) . . . . ? 
C13 C14 C15 C20 -179.2(4) . . . . ? 
C14 C15 C16 C17 176.7(3) . . . . ? 
C20 C15 C16 C17 -2.7(5) . . . . ? 
C14 C15 C16 C11 -1.9(5) . . . . ? 
C20 C15 C16 C11 178.7(3) . . . . ? 
C12 C11 C16 C15 -0.4(5) . . . . ? 
C1 C11 C16 C15 179.0(3) . . . . ? 
C12 C11 C16 C17 -178.9(3) . . . . ? 
C1 C11 C16 C17 0.5(4) . . . . ? 
C15 C16 C17 C18 1.6(4) . . . . ? 
C11 C16 C17 C18 -179.9(3) . . . . ? 
C16 C17 C18 C19 0.8(5) . . . . ? 
C17 C18 C19 C20 -2.1(5) . . . . ? 
C18 C19 C20 C15 0.9(6) . . . . ? 
C14 C15 C20 C19 -177.9(4) . . . . ? 
C16 C15 C20 C19 1.5(6) . . . . ? 
C2 N1 C21 C22 -176.8(3) . . . . ? 
Sm1 N1 C21 C22 3.9(3) . . . . ? 
C25 N3 C22 C23 0.0(3) . . . . ? 
Sm1 N3 C22 C23 170.2(2) . . . . ? 
C25 N3 C22 C21 -176.3(3) . . . . ? 
Sm1 N3 C22 C21 -6.1(3) . . . . ? 
N1 C21 C22 C23 -174.0(3) . . . . ? 
N1 C21 C22 N3 1.4(4) . . . . ? 
N3 C22 C23 C24 -0.4(4) . . . . ? 
C21 C22 C23 C24 175.3(3) . . . . ? 
C22 C23 C24 C25 0.6(4) . . . . ? 
C22 N3 C25 C24 0.4(4) . . . . ? 
Sm1 N3 C25 C24 -166.2(2) . . . . ? 
C23 C24 C25 N3 -0.7(4) . . . . ? 
C33 C28 C29 N4 177.8(2) . . . . ? 
C38 C28 C29 N4 -4.8(4) . . . . ? 
C33 C28 C29 C30 1.4(4) . . . . ? 
C38 C28 C29 C30 178.8(2) . . . . ? 
C48 N4 C29 C28 38.9(4) . . . . ? 
Sm1 N4 C29 C28 -147.4(2) . . . . ? 
C48 N4 C29 C30 -144.5(3) . . . . ? 
Sm1 N4 C29 C30 29.2(3) . . . . ? 
C28 C29 C30 C31 -2.2(4) . . . . ? 
N4 C29 C30 C31 -179.0(2) . . . . ? 
C29 C30 C31 C32 1.2(4) . . . . ? 
C30 C31 C32 C37 -178.5(3) . . . . ? 
C30 C31 C32 C33 0.5(4) . . . . ? 
C31 C32 C33 C34 178.9(2) . . . . ? 
C37 C32 C33 C34 -2.1(4) . . . . ? 
C31 C32 C33 C28 -1.3(4) . . . . ? 
C37 C32 C33 C28 177.8(2) . . . . ? 
C29 C28 C33 C34 -179.8(2) . . . . ? 
C38 C28 C33 C34 2.7(4) . . . . ? 
C29 C28 C33 C32 0.3(4) . . . . ? 
C38 C28 C33 C32 -177.1(2) . . . . ? 
C32 C33 C34 C35 2.2(4) . . . . ? 
C28 C33 C34 C35 -177.6(3) . . . . ? 
C33 C34 C35 C36 -0.6(4) . . . . ? 
C34 C35 C36 C37 -1.3(5) . . . . ? 
C35 C36 C37 C32 1.4(4) . . . . ? 
C31 C32 C37 C36 179.3(3) . . . . ? 
C33 C32 C37 C36 0.3(4) . . . . ? 
C29 C28 C38 C39 74.7(3) . . . . ? 
C33 C28 C38 C39 -107.9(3) . . . . ? 
C29 C28 C38 C43 -101.3(3) . . . . ? 
C33 C28 C38 C43 76.2(3) . . . . ? 
C43 C38 C39 N5 -179.6(3) . . . . ? 
C28 C38 C39 N5 4.4(4) . . . . ? 
C43 C38 C39 C40 0.3(4) . . . . ? 
C28 C38 C39 C40 -175.6(3) . . . . ? 
C53 N5 C39 C38 86.1(4) . . . . ? 
C54 N5 C39 C38 -141.2(4) . . . . ? 
C53 N5 C39 C40 -93.8(4) . . . . ? 
C54 N5 C39 C40 38.8(5) . . . . ? 
C38 C39 C40 C41 1.2(5) . . . . ? 
N5 C39 C40 C41 -178.8(3) . . . . ? 
C39 C40 C41 C42 -1.4(5) . . . . ? 
C40 C41 C42 C47 -179.2(3) . . . . ? 
C40 C41 C42 C43 0.0(5) . . . . ? 
C41 C42 C43 C44 179.5(3) . . . . ? 
C47 C42 C43 C44 -1.4(4) . . . . ? 
C41 C42 C43 C38 1.6(4) . . . . ? 
C47 C42 C43 C38 -179.3(3) . . . . ? 
C39 C38 C43 C44 -179.5(3) . . . . ? 
C28 C38 C43 C44 -3.4(4) . . . . ? 
C39 C38 C43 C42 -1.7(4) . . . . ? 
C28 C38 C43 C42 174.4(3) . . . . ? 
C42 C43 C44 C45 1.6(5) . . . . ? 
C38 C43 C44 C45 179.5(3) . . . . ? 
C43 C44 C45 C46 -1.2(6) . . . . ? 
C44 C45 C46 C47 0.4(7) . . . . ? 
C45 C46 C47 C42 -0.2(6) . . . . ? 
C41 C42 C47 C46 179.8(4) . . . . ? 
C43 C42 C47 C46 0.7(5) . . . . ? 
C29 N4 C48 C49 178.8(2) . . . . ? 
Sm1 N4 C48 C49 4.5(3) . . . . ? 
C52 N6 C49 C50 0.7(3) . . . . ? 
Sm1 N6 C49 C50 169.1(2) . . . . ? 
C52 N6 C49 C48 -171.9(3) . . . . ? 
Sm1 N6 C49 C48 -3.6(3) . . . . ? 
N4 C48 C49 N6 -0.8(4) . . . . ? 
N4 C48 C49 C50 -171.9(3) . . . . ? 
N6 C49 C50 C51 -0.6(4) . . . . ? 
C48 C49 C50 C51 171.3(3) . . . . ? 
C49 C50 C51 C52 0.2(4) . . . . ? 
C49 N6 C52 C51 -0.6(4) . . . . ? 
Sm1 N6 C52 C51 -164.5(3) . . . . ? 
C50 C51 C52 N6 0.3(4) . . . . ? 
C67 C62 C63 C64 0.0 . . . . ? 
C61 C62 C63 C64 -179.99(9) . . . . ? 
C62 C63 C64 C65 0.0 . . . . ? 
C63 C64 C65 C66 0.0 . . . . ? 
C64 C65 C66 C67 0.0 . . . . ? 
C65 C66 C67 C62 0.0 . . . . ? 
C63 C62 C67 C66 0.0 . . . . ? 
C61 C62 C67 C66 179.99(8) . . . . ? 
C74 C69 C70 C71 0.0 . . . . ? 
C68 C69 C70 C71 179.99(9) . . . . ? 
C69 C70 C71 C72 0.0 . . . . ? 
C70 C71 C72 C73 0.0 . . . . ? 
C71 C72 C73 C74 0.0 . . . . ? 
C72 C73 C74 C69 0.0 . . . . ? 
C70 C69 C74 C73 0.0 . . . . ? 
C68 C69 C74 C73 -179.99(9) . . . . ? 
  
_diffrn_measured_fraction_theta_max    1.000 
_diffrn_reflns_theta_full              27.86 
_diffrn_measured_fraction_theta_full   1.000 
_refine_diff_density_max    0.783 
_refine_diff_density_min   -0.758 
_refine_diff_density_rms    0.061 

#===END
  
data_compound3 
  
_audit_creation_method            SHELXL-97 
_chemical_name_systematic 
; 
 ? 
; 
_chemical_name_common             ? 
_chemical_melting_point           ? 
_chemical_formula_moiety          'C67 H70 N7 Si2 Y' 
_chemical_formula_sum 
 'C67 H70 N7 Si2 Y' 
_chemical_formula_weight          1118.39 
  
loop_ 
 _atom_type_symbol 
 _atom_type_description 
 _atom_type_scat_dispersion_real 
 _atom_type_scat_dispersion_imag 
 _atom_type_scat_source 
 'C'  'C'   0.0033   0.0016 
 'International Tables Vol C Tables 4.2.6.8 and 6.1.1.4' 
 'H'  'H'   0.0000   0.0000 
 'International Tables Vol C Tables 4.2.6.8 and 6.1.1.4' 
 'N'  'N'   0.0061   0.0033 
 'International Tables Vol C Tables 4.2.6.8 and 6.1.1.4' 
 'Si'  'Si'   0.0817   0.0704 
 'International Tables Vol C Tables 4.2.6.8 and 6.1.1.4' 
 'Y'  'Y'  -2.7962   3.5667 
 'International Tables Vol C Tables 4.2.6.8 and 6.1.1.4' 
  
_symmetry_cell_setting            orthorhombic 
_symmetry_space_group_name_H-M    'P 21 21 21' 
  
loop_ 
 _symmetry_equiv_pos_as_xyz 
 'x, y, z' 
 'x+1/2, -y+1/2, -z' 
 '-x, y+1/2, -z+1/2' 
 '-x+1/2, -y, z+1/2' 
  
_cell_length_a                    11.4444(10) 
_cell_length_b                    21.5082(16) 
_cell_length_c                    24.216(2) 
_cell_angle_alpha                 90.00 
_cell_angle_beta                  90.00 
_cell_angle_gamma                 90.00 
_cell_volume                      5960.6(8) 
_cell_formula_units_Z             4 
_cell_measurement_temperature     113(2) 
_cell_measurement_reflns_used     13824 
_cell_measurement_theta_min       1.7 
_cell_measurement_theta_max       27.1 
  
_exptl_crystal_description        platelet 
_exptl_crystal_colour             yellow 
_exptl_crystal_size_max           0.14 
_exptl_crystal_size_mid           0.12 
_exptl_crystal_size_min           0.08 
_exptl_crystal_density_meas       ? 
_exptl_crystal_density_diffrn     1.246 
_exptl_crystal_density_method     'not measured' 
_exptl_crystal_F_000              2352 
_exptl_absorpt_coefficient_mu     1.065 
_exptl_absorpt_correction_type    multi-scan 
_exptl_absorpt_correction_T_min   0.8652 
_exptl_absorpt_correction_T_max   0.9196 
_exptl_absorpt_process_details    'crystalclear' 
  
_exptl_special_details 
; 
 ? 
; 
  
_diffrn_ambient_temperature       113(2) 
_diffrn_radiation_wavelength      0.71070 
_diffrn_radiation_type            MoK\a 
_diffrn_radiation_source          'rotating anode' 
_diffrn_radiation_monochromator   confocal
_diffrn_measurement_device_type   'Rigaku Saturn' 
_diffrn_measurement_method        \w 
_diffrn_detector_area_resol_mean  14.63 
_diffrn_standards_number          ? 
_diffrn_standards_interval_count  ? 
_diffrn_standards_interval_time   ? 
_diffrn_standards_decay_%         ? 
_diffrn_reflns_number             52865 
_diffrn_reflns_av_R_equivalents   0.0755 
_diffrn_reflns_av_sigmaI/netI     0.0810 
_diffrn_reflns_limit_h_min        -14 
_diffrn_reflns_limit_h_max        14 
_diffrn_reflns_limit_k_min        -26 
_diffrn_reflns_limit_k_max        27 
_diffrn_reflns_limit_l_min        -30 
_diffrn_reflns_limit_l_max        30 
_diffrn_reflns_theta_min          1.68 
_diffrn_reflns_theta_max          27.00 
_reflns_number_total              12997 
_reflns_number_gt                 12104 
_reflns_threshold_expression      >2sigma(I) 
  
_computing_data_collection        CrystalClear 
_computing_cell_refinement        CrystalClear 
_computing_data_reduction         CrystalClear
_computing_structure_solution     'SHELXS-97 (Sheldrick, 1990)' 
_computing_structure_refinement   'SHELXL-97 (Sheldrick, 1997)' 
_computing_molecular_graphics     ? 
_computing_publication_material   'CrystalStructure 3.7.0' 
  
_refine_special_details 
; 
 Refinement of F^2^ against ALL reflections.  The weighted R-factor wR and 
 goodness of fit S are based on F^2^, conventional R-factors R are based 
 on F, with F set to zero for negative F^2^. The threshold expression of 
 F^2^ > 2sigma(F^2^) is used only for calculating R-factors(gt) etc. and is 
 not relevant to the choice of reflections for refinement.  R-factors based 
 on F^2^ are statistically about twice as large as those based on F, and R- 
 factors based on ALL data will be even larger. 
; 
  
_refine_ls_structure_factor_coef  Fsqd 
_refine_ls_matrix_type            full 
_refine_ls_weighting_scheme       calc 
_refine_ls_weighting_details 
 'calc w=1/[\s^2^(Fo^2^)+(0.0197P)^2^+1.0476P] where P=(Fo^2^+2Fc^2^)/3' 
_atom_sites_solution_primary      direct 
_atom_sites_solution_secondary    difmap 
_atom_sites_solution_hydrogens    geom 
_refine_ls_hydrogen_treatment     constr
_refine_ls_extinction_method      none 
_refine_ls_extinction_coef        ? 
_refine_ls_abs_structure_details 
 'Flack H D (1983), Acta Cryst. A39, 876-881' 
_refine_ls_abs_structure_Flack    0.027(5) 
_refine_ls_number_reflns          12997 
_refine_ls_number_parameters      746 
_refine_ls_number_restraints      100 
_refine_ls_R_factor_all           0.0717 
_refine_ls_R_factor_gt            0.0656 
_refine_ls_wR_factor_ref          0.1135 
_refine_ls_wR_factor_gt           0.1113 
_refine_ls_goodness_of_fit_ref    1.203 
_refine_ls_restrained_S_all       1.201 
_refine_ls_shift/su_max           0.001 
_refine_ls_shift/su_mean          0.000 
  
loop_ 
 _atom_site_label 
 _atom_site_type_symbol 
 _atom_site_fract_x 
 _atom_site_fract_y 
 _atom_site_fract_z 
 _atom_site_U_iso_or_equiv 
 _atom_site_adp_type 
 _atom_site_occupancy 
 _atom_site_symmetry_multiplicity 
 _atom_site_calc_flag 
 _atom_site_refinement_flags 
 _atom_site_disorder_assembly 
 _atom_site_disorder_group 
Y1 Y 0.30461(3) 0.506391(17) 0.586740(14) 0.02626(9) Uani 1 1 d . . . 
Si1 Si 0.22446(11) 0.41705(6) 0.69848(5) 0.0400(3) Uani 1 1 d . . . 
Si2 Si 0.09841(10) 0.39323(6) 0.59170(6) 0.0376(3) Uani 1 1 d . . . 
N1 N 0.2743(3) 0.60202(15) 0.63736(13) 0.0286(8) Uani 1 1 d . . . 
N2 N 0.3121(3) 0.71637(16) 0.55436(13) 0.0367(8) Uani 1 1 d . . . 
N3 N 0.4792(3) 0.53464(16) 0.62651(13) 0.0305(8) Uani 1 1 d . . . 
N4 N 0.4115(3) 0.45898(15) 0.51124(12) 0.0265(7) Uani 1 1 d . . . 
N5 N 0.6813(4) 0.52827(17) 0.49408(15) 0.0482(10) Uani 1 1 d . . . 
N6 N 0.2383(3) 0.55045(15) 0.50512(14) 0.0313(8) Uani 1 1 d . . . 
N7 N 0.2021(3) 0.43384(15) 0.62933(13) 0.0318(7) Uani 1 1 d . . . 
C1 C 0.1464(3) 0.69696(19) 0.63995(14) 0.0260(8) Uani 1 1 d . . . 
C2 C 0.1652(3) 0.6331(2) 0.63824(15) 0.0290(9) Uani 1 1 d . . . 
C3 C 0.0668(4) 0.5926(2) 0.63254(16) 0.0350(10) Uani 1 1 d . . . 
H3 H 0.0796 0.5490 0.6312 0.042 Uiso 1 1 calc R . . 
C4 C -0.0442(4) 0.6145(2) 0.62895(17) 0.0363(10) Uani 1 1 d . . . 
H4 H -0.1073 0.5861 0.6257 0.044 Uiso 1 1 calc R . . 
C5 C -0.0669(4) 0.6790(2) 0.63000(16) 0.0326(10) Uani 1 1 d . . . 
C6 C 0.0295(3) 0.7206(2) 0.63514(15) 0.0293(9) Uani 1 1 d . . . 
C7 C 0.0050(4) 0.7851(2) 0.63407(16) 0.0348(10) Uani 1 1 d . . . 
H7 H 0.0677 0.8140 0.6360 0.042 Uiso 1 1 calc R . . 
C8 C -0.1070(4) 0.8068(2) 0.63025(18) 0.0445(12) Uani 1 1 d . . . 
H8 H -0.1211 0.8503 0.6290 0.053 Uiso 1 1 calc R . . 
C9 C -0.2009(4) 0.7653(2) 0.62815(17) 0.0474(12) Uani 1 1 d . . . 
H9 H -0.2785 0.7809 0.6272 0.057 Uiso 1 1 calc R . . 
C10 C -0.1824(4) 0.7029(2) 0.62745(16) 0.0396(10) Uani 1 1 d . . . 
H10 H -0.2469 0.6752 0.6252 0.048 Uiso 1 1 calc R . . 
C11 C 0.2450(3) 0.74225(19) 0.64606(16) 0.0291(9) Uani 1 1 d . . . 
C12 C 0.3262(4) 0.7508(2) 0.60402(16) 0.0363(10) Uani 1 1 d . . . 
C13 C 0.4202(4) 0.7920(2) 0.6121(2) 0.0542(14) Uani 1 1 d . . . 
H13 H 0.4778 0.7960 0.5841 0.065 Uiso 1 1 calc R . . 
C14 C 0.4309(5) 0.8265(3) 0.6592(2) 0.0642(17) Uani 1 1 d . . . 
H14 H 0.4943 0.8547 0.6631 0.077 Uiso 1 1 calc R . . 
C15 C 0.3484(4) 0.8206(2) 0.70225(19) 0.0439(12) Uani 1 1 d . . . 
C16 C 0.2560(3) 0.77720(19) 0.69683(16) 0.0298(9) Uani 1 1 d . . . 
C17 C 0.1783(4) 0.77006(19) 0.74151(16) 0.0334(9) Uani 1 1 d . . . 
H17 H 0.1165 0.7407 0.7390 0.040 Uiso 1 1 calc R . . 
C18 C 0.1906(4) 0.8046(2) 0.78837(17) 0.0394(10) Uani 1 1 d . . . 
H18 H 0.1379 0.7985 0.8182 0.047 Uiso 1 1 calc R . . 
C19 C 0.2802(4) 0.8493(2) 0.79331(18) 0.0439(12) Uani 1 1 d . . . 
H19 H 0.2863 0.8739 0.8258 0.053 Uiso 1 1 calc R . . 
C20 C 0.3578(4) 0.8570(2) 0.7514(2) 0.0536(14) Uani 1 1 d . . . 
H20 H 0.4188 0.8867 0.7548 0.064 Uiso 1 1 calc R . . 
C21 C 0.3666(4) 0.6199(2) 0.66486(16) 0.0333(10) Uani 1 1 d . . . 
H21 H 0.3620 0.6555 0.6881 0.040 Uiso 1 1 calc R . . 
C22 C 0.4729(4) 0.58716(19) 0.66047(16) 0.0304(9) Uani 1 1 d . . . 
C23 C 0.5778(4) 0.5946(2) 0.68881(17) 0.0416(11) Uani 1 1 d . . . 
H23 H 0.5960 0.6266 0.7144 0.050 Uiso 1 1 calc R . . 
C24 C 0.6511(4) 0.5462(2) 0.67263(19) 0.0433(12) Uani 1 1 d . . . 
H24 H 0.7288 0.5389 0.6848 0.052 Uiso 1 1 calc R . . 
C25 C 0.5873(3) 0.5109(2) 0.63497(17) 0.0391(10) Uani 1 1 d . . . 
H25 H 0.6161 0.4745 0.6174 0.047 Uiso 1 1 calc R . . 
C26 C 0.2233(5) 0.7406(2) 0.51762(19) 0.0542(14) Uani 1 1 d . . . 
H26A H 0.1521 0.7495 0.5387 0.081 Uiso 1 1 calc R . . 
H26B H 0.2059 0.7097 0.4890 0.081 Uiso 1 1 calc R . . 
H26C H 0.2516 0.7789 0.5003 0.081 Uiso 1 1 calc R . . 
C27 C 0.4192(5) 0.7020(3) 0.5249(2) 0.0660(17) Uani 1 1 d . . . 
H27A H 0.4512 0.7401 0.5087 0.099 Uiso 1 1 calc R . . 
H27B H 0.4024 0.6720 0.4954 0.099 Uiso 1 1 calc R . . 
H27C H 0.4761 0.6840 0.5506 0.099 Uiso 1 1 calc R . . 
C28 C 0.5960(3) 0.40387(18) 0.48428(15) 0.0270(8) Uani 1 1 d . . . 
C29 C 0.4977(3) 0.41154(19) 0.51719(16) 0.0275(9) Uani 1 1 d . . . 
C30 C 0.4783(4) 0.37138(19) 0.56264(16) 0.0307(9) Uani 1 1 d . . . 
H30 H 0.4112 0.3776 0.5851 0.037 Uiso 1 1 calc R . . 
C31 C 0.5527(4) 0.32420(19) 0.57503(16) 0.0321(9) Uani 1 1 d . . . 
H31 H 0.5369 0.2980 0.6057 0.038 Uiso 1 1 calc R . . 
C32 C 0.6531(4) 0.31383(19) 0.54256(16) 0.0306(9) Uani 1 1 d . . . 
C33 C 0.6759(3) 0.35473(18) 0.49736(15) 0.0299(9) Uani 1 1 d . . . 
C34 C 0.7791(3) 0.3439(2) 0.46593(16) 0.0329(10) Uani 1 1 d . . . 
H34 H 0.7973 0.3708 0.4360 0.040 Uiso 1 1 calc R . . 
C35 C 0.8523(4) 0.2957(2) 0.47782(18) 0.0375(10) Uani 1 1 d . . . 
H35 H 0.9208 0.2899 0.4563 0.045 Uiso 1 1 calc R . . 
C36 C 0.8284(4) 0.2547(2) 0.52118(19) 0.0419(11) Uani 1 1 d . . . 
H36 H 0.8793 0.2208 0.5283 0.050 Uiso 1 1 calc R . . 
C37 C 0.7311(4) 0.2638(2) 0.55347(17) 0.0376(11) Uani 1 1 d . . . 
H37 H 0.7158 0.2364 0.5834 0.045 Uiso 1 1 calc R . . 
C38 C 0.6192(3) 0.44455(19) 0.43493(15) 0.0276(9) Uani 1 1 d . . . 
C39 C 0.6573(3) 0.5044(2) 0.44014(15) 0.0344(9) Uani 1 1 d . . . 
C40 C 0.6686(4) 0.5427(2) 0.39260(19) 0.0449(12) Uani 1 1 d . . . 
H40 H 0.6944 0.5844 0.3968 0.054 Uiso 1 1 calc R . . 
C41 C 0.6435(4) 0.5212(2) 0.34154(19) 0.0446(12) Uani 1 1 d . . . 
H41 H 0.6509 0.5480 0.3106 0.054 Uiso 1 1 calc R . . 
C42 C 0.6064(4) 0.4594(2) 0.33390(17) 0.0371(10) Uani 1 1 d . . . 
C43 C 0.5947(4) 0.4201(2) 0.38092(16) 0.0309(9) Uani 1 1 d . . . 
C44 C 0.5566(5) 0.3583(2) 0.37302(18) 0.0483(13) Uani 1 1 d . . . 
H44 H 0.5473 0.3318 0.4041 0.058 Uiso 1 1 calc R . . 
C45 C 0.5326(6) 0.3359(3) 0.3209(2) 0.0704(19) Uani 1 1 d . . . 
H45 H 0.5087 0.2939 0.3161 0.085 Uiso 1 1 calc R . . 
C46 C 0.5436(6) 0.3751(3) 0.2749(2) 0.0718(19) Uani 1 1 d . . . 
H46 H 0.5251 0.3600 0.2391 0.086 Uiso 1 1 calc R . . 
C47 C 0.5803(5) 0.4341(3) 0.28131(18) 0.0513(13) Uani 1 1 d . . . 
H47 H 0.5891 0.4597 0.2496 0.062 Uiso 1 1 calc R . . 
C48 C 0.3776(3) 0.47896(18) 0.46253(15) 0.0277(9) Uani 1 1 d . . . 
H48 H 0.4124 0.4624 0.4301 0.033 Uiso 1 1 calc R . . 
C49 C 0.2895(3) 0.52495(18) 0.45796(15) 0.0289(9) Uani 1 1 d . . . 
C50 C 0.2366(4) 0.5479(2) 0.41108(19) 0.0418(11) Uani 1 1 d . . . 
H50 H 0.2567 0.5386 0.3739 0.050 Uiso 1 1 calc R . . 
C51 C 0.1477(5) 0.5875(2) 0.4289(2) 0.0570(15) Uani 1 1 d . . . 
H51 H 0.0948 0.6100 0.4062 0.068 Uiso 1 1 calc R . . 
C52 C 0.1518(4) 0.5874(2) 0.48632(19) 0.0455(12) Uani 1 1 d . . . 
H52 H 0.1002 0.6104 0.5093 0.055 Uiso 1 1 calc R . . 
C53 C 0.7969(6) 0.5148(4) 0.5131(3) 0.141(4) Uani 1 1 d . . . 
H53A H 0.8116 0.4701 0.5102 0.211 Uiso 1 1 calc R . . 
H53B H 0.8047 0.5278 0.5517 0.211 Uiso 1 1 calc R . . 
H53C H 0.8538 0.5375 0.4905 0.211 Uiso 1 1 calc R . . 
C54 C 0.6493(7) 0.5908(3) 0.5037(2) 0.090(2) Uani 1 1 d . . . 
H54A H 0.7069 0.6185 0.4866 0.134 Uiso 1 1 calc R . . 
H54B H 0.6467 0.5986 0.5436 0.134 Uiso 1 1 calc R . . 
H54C H 0.5721 0.5987 0.4877 0.134 Uiso 1 1 calc R . . 
C55 C 0.3109(6) 0.3437(3) 0.7091(2) 0.084(2) Uani 1 1 d . . . 
H55A H 0.2682 0.3085 0.6933 0.127 Uiso 1 1 calc R . . 
H55B H 0.3226 0.3368 0.7487 0.127 Uiso 1 1 calc R . . 
H55C H 0.3870 0.3477 0.6909 0.127 Uiso 1 1 calc R . . 
C56 C 0.0873(5) 0.4092(3) 0.7390(2) 0.080(2) Uani 1 1 d . . . 
H56A H 0.0428 0.4481 0.7369 0.120 Uiso 1 1 calc R . . 
H56B H 0.1065 0.4003 0.7777 0.120 Uiso 1 1 calc R . . 
H56C H 0.0404 0.3751 0.7239 0.120 Uiso 1 1 calc R . . 
C57 C 0.3113(6) 0.4787(3) 0.7339(2) 0.090(2) Uani 1 1 d . . . 
H57A H 0.3869 0.4834 0.7154 0.135 Uiso 1 1 calc R . . 
H57B H 0.3238 0.4670 0.7725 0.135 Uiso 1 1 calc R . . 
H57C H 0.2687 0.5182 0.7323 0.135 Uiso 1 1 calc R . . 
C58 C 0.1075(5) 0.3074(2) 0.6018(2) 0.0610(16) Uani 1 1 d . . . 
H58A H 0.1848 0.2927 0.5903 0.092 Uiso 1 1 calc R . . 
H58B H 0.0473 0.2869 0.5795 0.092 Uiso 1 1 calc R . . 
H58C H 0.0953 0.2975 0.6409 0.092 Uiso 1 1 calc R . . 
C59 C -0.0535(4) 0.4179(2) 0.6092(2) 0.0505(13) Uani 1 1 d . . . 
H59A H -0.0682 0.4104 0.6485 0.076 Uiso 1 1 calc R . . 
H59B H -0.1093 0.3941 0.5871 0.076 Uiso 1 1 calc R . . 
H59C H -0.0627 0.4623 0.6013 0.076 Uiso 1 1 calc R . . 
C60 C 0.1180(5) 0.4073(3) 0.5163(2) 0.0631(17) Uani 1 1 d . . . 
H60A H 0.1152 0.4521 0.5090 0.095 Uiso 1 1 calc R . . 
H60B H 0.0553 0.3865 0.4958 0.095 Uiso 1 1 calc R . . 
H60C H 0.1937 0.3907 0.5045 0.095 Uiso 1 1 calc R . . 
C61 C 0.2442(6) 0.3813(4) 0.3384(4) 0.072(3) Uani 0.599(8) 1 d PDU A 1 
H61A H 0.2660 0.3871 0.3772 0.107 Uiso 0.599(8) 1 calc PR A 1 
H61B H 0.2667 0.4182 0.3171 0.107 Uiso 0.599(8) 1 calc PR A 1 
H61C H 0.2847 0.3447 0.3236 0.107 Uiso 0.599(8) 1 calc PR A 1 
C62 C 0.1152(4) 0.3719(3) 0.3342(2) 0.049(3) Uani 0.599(8) 1 d PGDU A 1 
C63 C 0.0384(6) 0.4189(2) 0.3494(2) 0.055(3) Uani 0.599(8) 1 d PGDU A 1 
H63A H 0.0677 0.4575 0.3625 0.066 Uiso 0.599(8) 1 calc PR A 1 
C64 C -0.0815(6) 0.4095(3) 0.3453(3) 0.048(2) Uani 0.599(8) 1 d PGDU A 1 
H64A H -0.1340 0.4416 0.3557 0.058 Uiso 0.599(8) 1 calc PR A 1 
C65 C -0.1245(4) 0.3531(4) 0.3260(4) 0.046(3) Uani 0.599(8) 1 d PGDU A 1 
H65A H -0.2064 0.3466 0.3232 0.056 Uiso 0.599(8) 1 calc PR A 1 
C66 C -0.0476(6) 0.3060(3) 0.3109(4) 0.050(4) Uani 0.599(8) 1 d PGDU A 1 
H66A H -0.0770 0.2675 0.2977 0.059 Uiso 0.599(8) 1 calc PR A 1 
C67 C 0.0723(6) 0.3154(3) 0.3150(4) 0.039(2) Uani 0.599(8) 1 d PGDU A 1 
H67A H 0.1248 0.2833 0.3046 0.047 Uiso 0.599(8) 1 calc PR A 1 
C68 C -0.0466(14) 0.4775(5) 0.3669(6) 0.097(6) Uani 0.401(8) 1 d PDU A 2 
H68A H -0.1308 0.4778 0.3743 0.145 Uiso 0.401(8) 1 calc PR A 2 
H68B H -0.0283 0.5091 0.3391 0.145 Uiso 0.401(8) 1 calc PR A 2 
H68C H -0.0039 0.4867 0.4010 0.145 Uiso 0.401(8) 1 calc PR A 2 
C69 C -0.0112(10) 0.4147(4) 0.3458(4) 0.052(4) Uani 0.401(8) 1 d PGDU A 2 
C70 C -0.0974(7) 0.3725(5) 0.3307(6) 0.050(4) Uani 0.401(8) 1 d PGDU A 2 
H70A H -0.1775 0.3837 0.3337 0.060 Uiso 0.401(8) 1 calc PR A 2 
C71 C -0.0664(10) 0.3141(5) 0.3110(7) 0.057(6) Uani 0.401(8) 1 d PGDU A 2 
H71A H -0.1253 0.2853 0.3006 0.068 Uiso 0.401(8) 1 calc PR A 2 
C72 C 0.0508(12) 0.2979(4) 0.3066(6) 0.051(5) Uani 0.401(8) 1 d PGDU A 2 
H72A H 0.0719 0.2579 0.2932 0.062 Uiso 0.401(8) 1 calc PR A 2 
C73 C 0.1370(8) 0.3401(5) 0.3218(4) 0.053(4) Uani 0.401(8) 1 d PGDU A 2 
H73A H 0.2170 0.3289 0.3187 0.063 Uiso 0.401(8) 1 calc PR A 2 
C74 C 0.1060(8) 0.3985(5) 0.3414(4) 0.060(5) Uani 0.401(8) 1 d PGDU A 2 
H74A H 0.1649 0.4273 0.3518 0.072 Uiso 0.401(8) 1 calc PR A 2 
  
loop_ 
 _atom_site_aniso_label 
 _atom_site_aniso_U_11 
 _atom_site_aniso_U_22 
 _atom_site_aniso_U_33 
 _atom_site_aniso_U_23 
 _atom_site_aniso_U_13 
 _atom_site_aniso_U_12 
Y1 0.02754(17) 0.02546(18) 0.02578(16) -0.00089(16) 0.00034(16) -0.00136(16) 
Si1 0.0437(8) 0.0391(8) 0.0371(6) 0.0097(6) 0.0044(5) -0.0041(6) 
Si2 0.0345(6) 0.0329(7) 0.0454(7) 0.0015(6) 0.0032(6) -0.0069(5) 
N1 0.0270(18) 0.0289(19) 0.0300(17) -0.0018(14) 0.0051(14) -0.0003(14) 
N2 0.040(2) 0.044(2) 0.0267(17) -0.0038(15) 0.0109(16) 0.0001(19) 
N3 0.0284(17) 0.036(2) 0.0266(17) -0.0047(15) -0.0029(14) 0.0012(15) 
N4 0.0246(17) 0.0286(19) 0.0263(17) 0.0002(14) -0.0009(14) 0.0019(14) 
N5 0.074(3) 0.031(2) 0.040(2) -0.0032(16) -0.021(2) -0.001(2) 
N6 0.038(2) 0.0239(19) 0.0322(18) 0.0002(14) -0.0033(15) 0.0038(15) 
N7 0.0328(18) 0.0302(18) 0.0324(17) 0.0022(14) 0.0020(16) -0.0035(17) 
C1 0.030(2) 0.030(2) 0.0179(17) -0.0021(16) 0.0020(15) -0.0002(17) 
C2 0.029(2) 0.038(2) 0.0198(18) -0.0030(16) 0.0022(15) -0.0037(18) 
C3 0.039(2) 0.035(3) 0.031(2) -0.0067(19) 0.0050(19) -0.006(2) 
C4 0.034(2) 0.045(3) 0.030(2) -0.006(2) 0.0021(18) -0.009(2) 
C5 0.030(2) 0.045(3) 0.0233(19) -0.0030(18) 0.0009(17) 0.0006(19) 
C6 0.029(2) 0.042(3) 0.0169(18) 0.0005(17) 0.0017(15) 0.0042(19) 
C7 0.036(2) 0.041(3) 0.027(2) -0.0056(19) -0.0086(18) 0.004(2) 
C8 0.050(3) 0.049(3) 0.034(2) -0.004(2) -0.008(2) 0.019(2) 
C9 0.036(2) 0.071(4) 0.035(2) -0.009(2) -0.007(2) 0.017(3) 
C10 0.035(2) 0.057(3) 0.027(2) -0.0075(19) -0.0071(19) 0.004(2) 
C11 0.029(2) 0.031(2) 0.027(2) 0.0006(17) -0.0001(16) -0.0019(18) 
C12 0.039(3) 0.036(2) 0.034(2) -0.0009(18) 0.0079(18) -0.004(2) 
C13 0.049(3) 0.066(4) 0.048(3) -0.009(3) 0.020(2) -0.028(3) 
C14 0.058(3) 0.074(4) 0.060(3) -0.018(3) 0.020(3) -0.037(3) 
C15 0.040(3) 0.050(3) 0.042(3) -0.009(2) 0.006(2) -0.011(2) 
C16 0.029(2) 0.033(2) 0.028(2) -0.0059(17) 0.0011(16) -0.0001(17) 
C17 0.030(2) 0.040(2) 0.030(2) -0.0055(17) 0.0000(18) 0.0030(19) 
C18 0.031(2) 0.054(3) 0.033(2) -0.008(2) 0.004(2) 0.007(2) 
C19 0.043(3) 0.049(3) 0.040(2) -0.017(2) -0.002(2) 0.002(2) 
C20 0.049(3) 0.060(3) 0.052(3) -0.023(3) -0.001(2) -0.017(3) 
C21 0.040(2) 0.032(2) 0.028(2) -0.0035(18) 0.0018(18) 0.001(2) 
C22 0.036(2) 0.031(2) 0.025(2) -0.0047(17) -0.0027(17) -0.0019(19) 
C23 0.041(3) 0.051(3) 0.033(2) -0.008(2) -0.009(2) -0.002(2) 
C24 0.030(2) 0.056(3) 0.044(3) -0.002(2) -0.012(2) 0.000(2) 
C25 0.037(2) 0.040(3) 0.040(2) -0.004(2) -0.0020(18) 0.008(2) 
C26 0.072(4) 0.057(3) 0.034(2) -0.003(2) 0.005(2) 0.014(3) 
C27 0.058(3) 0.100(5) 0.040(3) -0.023(3) 0.019(3) 0.007(3) 
C28 0.028(2) 0.029(2) 0.0240(19) -0.0026(16) -0.0041(16) -0.0005(17) 
C29 0.028(2) 0.026(2) 0.029(2) -0.0018(17) -0.0027(16) 0.0004(17) 
C30 0.033(2) 0.031(2) 0.028(2) -0.0041(18) 0.0035(17) 0.0000(18) 
C31 0.039(2) 0.029(2) 0.028(2) 0.0020(17) -0.0060(17) -0.0005(18) 
C32 0.041(2) 0.026(2) 0.0254(19) -0.0015(16) -0.0079(17) 0.0008(18) 
C33 0.031(2) 0.029(2) 0.0290(19) -0.0041(16) -0.0068(17) 0.0017(18) 
C34 0.033(2) 0.035(2) 0.031(2) -0.0043(18) -0.0034(17) 0.0014(19) 
C35 0.034(2) 0.036(3) 0.043(2) -0.007(2) -0.005(2) 0.005(2) 
C36 0.043(3) 0.031(2) 0.052(3) -0.003(2) -0.013(2) 0.011(2) 
C37 0.047(3) 0.027(2) 0.038(2) 0.0008(19) -0.012(2) 0.0008(19) 
C38 0.025(2) 0.031(2) 0.0269(19) -0.0024(16) 0.0013(16) 0.0019(17) 
C39 0.037(2) 0.033(2) 0.034(2) 0.002(2) -0.0077(16) 0.000(2) 
C40 0.049(3) 0.033(3) 0.052(3) 0.010(2) -0.012(2) -0.009(2) 
C41 0.048(3) 0.049(3) 0.037(2) 0.017(2) -0.002(2) 0.002(2) 
C42 0.039(3) 0.044(3) 0.029(2) 0.0029(19) 0.0038(19) 0.009(2) 
C43 0.032(2) 0.035(2) 0.025(2) -0.0022(17) -0.0016(17) 0.0038(19) 
C44 0.080(4) 0.035(3) 0.030(2) 0.000(2) -0.010(2) -0.005(3) 
C45 0.133(6) 0.042(3) 0.037(3) -0.008(2) -0.031(3) 0.000(4) 
C46 0.131(6) 0.053(4) 0.032(3) -0.004(2) -0.024(3) 0.009(4) 
C47 0.070(4) 0.058(4) 0.025(2) 0.008(2) 0.004(2) 0.012(3) 
C48 0.0243(19) 0.032(2) 0.0270(19) -0.0036(16) 0.0013(15) -0.0032(16) 
C49 0.029(2) 0.030(2) 0.0276(18) 0.0005(15) -0.0014(16) 0.0017(18) 
C50 0.052(3) 0.046(3) 0.028(2) 0.005(2) -0.012(2) 0.010(2) 
C51 0.068(3) 0.059(3) 0.044(3) 0.003(2) -0.018(2) 0.027(3) 
C52 0.052(3) 0.048(3) 0.037(2) -0.005(2) -0.005(2) 0.016(2) 
C53 0.122(6) 0.157(8) 0.144(7) -0.106(6) -0.105(6) 0.085(6) 
C54 0.150(7) 0.051(4) 0.068(4) -0.021(3) -0.033(4) 0.034(4) 
C55 0.094(5) 0.086(5) 0.073(4) 0.015(3) -0.016(4) 0.036(4) 
C56 0.076(4) 0.117(6) 0.047(3) 0.022(4) 0.009(3) -0.001(4) 
C57 0.133(6) 0.101(5) 0.036(3) 0.018(3) -0.020(4) -0.060(5) 
C58 0.055(3) 0.036(3) 0.092(5) -0.008(3) -0.007(3) -0.005(2) 
C59 0.040(3) 0.048(3) 0.063(3) 0.002(3) -0.007(2) -0.003(2) 
C60 0.062(4) 0.085(4) 0.042(3) -0.007(3) 0.002(3) -0.041(3) 
C61 0.058(5) 0.072(6) 0.085(6) 0.002(5) 0.000(5) -0.002(5) 
C62 0.049(5) 0.043(6) 0.055(5) 0.003(5) 0.008(4) 0.004(4) 
C63 0.054(6) 0.053(6) 0.059(5) -0.002(5) 0.007(5) 0.005(5) 
C64 0.047(5) 0.052(5) 0.045(4) -0.001(4) 0.007(4) 0.004(5) 
C65 0.056(5) 0.046(6) 0.037(5) 0.005(4) 0.006(4) -0.004(5) 
C66 0.050(6) 0.055(6) 0.043(6) 0.006(5) -0.016(5) -0.004(5) 
C67 0.045(5) 0.035(5) 0.037(5) 0.005(4) -0.003(4) -0.001(4) 
C68 0.090(9) 0.092(10) 0.108(10) -0.015(8) 0.006(7) 0.002(8) 
C69 0.047(8) 0.050(7) 0.059(7) 0.001(6) 0.009(6) 0.021(6) 
C70 0.051(7) 0.046(8) 0.052(7) -0.005(6) 0.011(6) -0.005(6) 
C71 0.068(9) 0.048(9) 0.053(9) 0.012(7) 0.010(7) 0.003(7) 
C72 0.056(8) 0.054(8) 0.043(7) 0.004(6) 0.000(6) -0.003(7) 
C73 0.057(7) 0.049(8) 0.052(7) 0.009(6) 0.013(6) -0.001(6) 
C74 0.059(8) 0.052(8) 0.070(8) 0.005(7) 0.013(7) 0.008(7) 
  
_geom_special_details 
; 
 All esds (except the esd in the dihedral angle between two l.s. planes) 
 are estimated using the full covariance matrix.  The cell esds are taken 
 into account individually in the estimation of esds in distances, angles 
 and torsion angles; correlations between esds in cell parameters are only 
 used when they are defined by crystal symmetry.  An approximate (isotropic) 
 treatment of cell esds is used for estimating esds involving l.s. planes. 
; 
  
loop_ 
 _geom_bond_atom_site_label_1 
 _geom_bond_atom_site_label_2 
 _geom_bond_distance 
 _geom_bond_site_symmetry_2 
 _geom_bond_publ_flag 
Y1 N7 2.208(3) . ? 
Y1 N3 2.300(3) . ? 
Y1 N6 2.319(3) . ? 
Y1 N1 2.419(3) . ? 
Y1 N4 2.425(3) . ? 
Si1 N7 1.732(3) . ? 
Si1 C56 1.859(6) . ? 
Si1 C57 1.865(6) . ? 
Si1 C55 1.879(6) . ? 
Si2 N7 1.732(4) . ? 
Si2 C60 1.864(5) . ? 
Si2 C58 1.865(5) . ? 
Si2 C59 1.867(5) . ? 
N1 C21 1.307(5) . ? 
N1 C2 1.416(5) . ? 
N2 C12 1.421(5) . ? 
N2 C26 1.448(6) . ? 
N2 C27 1.452(6) . ? 
N3 C25 1.354(5) . ? 
N3 C22 1.399(5) . ? 
N4 C48 1.314(5) . ? 
N4 C29 1.427(5) . ? 
N5 C54 1.413(6) . ? 
N5 C39 1.430(5) . ? 
N5 C53 1.431(7) . ? 
N6 C52 1.349(5) . ? 
N6 C49 1.396(5) . ? 
C1 C2 1.392(5) . ? 
C1 C6 1.436(5) . ? 
C1 C11 1.498(5) . ? 
C2 C3 1.429(5) . ? 
C3 C4 1.358(6) . ? 
C3 H3 0.9500 . ? 
C4 C5 1.411(6) . ? 
C4 H4 0.9500 . ? 
C5 C10 1.419(6) . ? 
C5 C6 1.427(6) . ? 
C6 C7 1.415(6) . ? 
C7 C8 1.367(6) . ? 
C7 H7 0.9500 . ? 
C8 C9 1.398(7) . ? 
C8 H8 0.9500 . ? 
C9 C10 1.361(6) . ? 
C9 H9 0.9500 . ? 
C10 H10 0.9500 . ? 
C11 C12 1.391(5) . ? 
C11 C16 1.447(5) . ? 
C12 C13 1.409(6) . ? 
C13 C14 1.367(7) . ? 
C13 H13 0.9500 . ? 
C14 C15 1.411(6) . ? 
C14 H14 0.9500 . ? 
C15 C16 1.417(6) . ? 
C15 C20 1.428(6) . ? 
C16 C17 1.409(5) . ? 
C17 C18 1.364(5) . ? 
C17 H17 0.9500 . ? 
C18 C19 1.410(6) . ? 
C18 H18 0.9500 . ? 
C19 C20 1.359(6) . ? 
C19 H19 0.9500 . ? 
C20 H20 0.9500 . ? 
C21 C22 1.410(6) . ? 
C21 H21 0.9500 . ? 
C22 C23 1.393(6) . ? 
C23 C24 1.392(6) . ? 
C23 H23 0.9500 . ? 
C24 C25 1.394(6) . ? 
C24 H24 0.9500 . ? 
C25 H25 0.9500 . ? 
C26 H26A 0.9800 . ? 
C26 H26B 0.9800 . ? 
C26 H26C 0.9800 . ? 
C27 H27A 0.9800 . ? 
C27 H27B 0.9800 . ? 
C27 H27C 0.9800 . ? 
C28 C29 1.388(5) . ? 
C28 C33 1.433(5) . ? 
C28 C38 1.505(5) . ? 
C29 C30 1.417(5) . ? 
C30 C31 1.358(5) . ? 
C30 H30 0.9500 . ? 
C31 C32 1.410(6) . ? 
C31 H31 0.9500 . ? 
C32 C37 1.423(6) . ? 
C32 C33 1.428(5) . ? 
C33 C34 1.424(6) . ? 
C34 C35 1.362(6) . ? 
C34 H34 0.9500 . ? 
C35 C36 1.398(6) . ? 
C35 H35 0.9500 . ? 
C36 C37 1.375(6) . ? 
C36 H36 0.9500 . ? 
C37 H37 0.9500 . ? 
C38 C39 1.365(6) . ? 
C38 C43 1.437(5) . ? 
C39 C40 1.421(6) . ? 
C40 C41 1.351(6) . ? 
C40 H40 0.9500 . ? 
C41 C42 1.409(6) . ? 
C41 H41 0.9500 . ? 
C42 C47 1.416(6) . ? 
C42 C43 1.424(6) . ? 
C43 C44 1.412(6) . ? 
C44 C45 1.380(6) . ? 
C44 H44 0.9500 . ? 
C45 C46 1.403(7) . ? 
C45 H45 0.9500 . ? 
C46 C47 1.346(7) . ? 
C46 H46 0.9500 . ? 
C47 H47 0.9500 . ? 
C48 C49 1.416(5) . ? 
C48 H48 0.9500 . ? 
C49 C50 1.378(5) . ? 
C50 C51 1.394(6) . ? 
C50 H50 0.9500 . ? 
C51 C52 1.392(6) . ? 
C51 H51 0.9500 . ? 
C52 H52 0.9500 . ? 
C53 H53A 0.9800 . ? 
C53 H53B 0.9800 . ? 
C53 H53C 0.9800 . ? 
C54 H54A 0.9800 . ? 
C54 H54B 0.9800 . ? 
C54 H54C 0.9800 . ? 
C55 H55A 0.9800 . ? 
C55 H55B 0.9800 . ? 
C55 H55C 0.9800 . ? 
C56 H56A 0.9800 . ? 
C56 H56B 0.9800 . ? 
C56 H56C 0.9800 . ? 
C57 H57A 0.9800 . ? 
C57 H57B 0.9800 . ? 
C57 H57C 0.9800 . ? 
C58 H58A 0.9800 . ? 
C58 H58B 0.9800 . ? 
C58 H58C 0.9800 . ? 
C59 H59A 0.9800 . ? 
C59 H59B 0.9800 . ? 
C59 H59C 0.9800 . ? 
C60 H60A 0.9800 . ? 
C60 H60B 0.9800 . ? 
C60 H60C 0.9800 . ? 
C61 C62 1.494(7) . ? 
C61 H61A 0.9800 . ? 
C61 H61B 0.9800 . ? 
C61 H61C 0.9800 . ? 
C62 C63 1.3900 . ? 
C62 C67 1.3900 . ? 
C63 C64 1.3900 . ? 
C63 H63A 0.9500 . ? 
C64 C65 1.3900 . ? 
C64 H64A 0.9500 . ? 
C65 C66 1.3900 . ? 
C65 H65A 0.9500 . ? 
C66 C67 1.3900 . ? 
C66 H66A 0.9500 . ? 
C67 H67A 0.9500 . ? 
C68 C69 1.499(8) . ? 
C68 H68A 0.9800 . ? 
C68 H68B 0.9800 . ? 
C68 H68C 0.9800 . ? 
C69 C70 1.3900 . ? 
C69 C74 1.3900 . ? 
C70 C71 1.3900 . ? 
C70 H70A 0.9500 . ? 
C71 C72 1.3900 . ? 
C71 H71A 0.9500 . ? 
C72 C73 1.3900 . ? 
C72 H72A 0.9500 . ? 
C73 C74 1.3900 . ? 
C73 H73A 0.9500 . ? 
C74 H74A 0.9500 . ? 
  
loop_ 
 _geom_angle_atom_site_label_1 
 _geom_angle_atom_site_label_2 
 _geom_angle_atom_site_label_3 
 _geom_angle 
 _geom_angle_site_symmetry_1 
 _geom_angle_site_symmetry_3 
 _geom_angle_publ_flag 
N7 Y1 N3 116.92(12) . . ? 
N7 Y1 N6 120.87(12) . . ? 
N3 Y1 N6 122.20(12) . . ? 
N7 Y1 N1 106.73(11) . . ? 
N3 Y1 N1 71.81(11) . . ? 
N6 Y1 N1 92.15(11) . . ? 
N7 Y1 N4 108.85(11) . . ? 
N3 Y1 N4 89.34(11) . . ? 
N6 Y1 N4 72.20(11) . . ? 
N1 Y1 N4 144.29(11) . . ? 
N7 Si1 C56 113.9(2) . . ? 
N7 Si1 C57 112.0(2) . . ? 
C56 Si1 C57 105.7(3) . . ? 
N7 Si1 C55 112.7(2) . . ? 
C56 Si1 C55 107.2(3) . . ? 
C57 Si1 C55 104.7(3) . . ? 
N7 Si2 C60 110.5(2) . . ? 
N7 Si2 C58 113.1(2) . . ? 
C60 Si2 C58 106.4(3) . . ? 
N7 Si2 C59 112.0(2) . . ? 
C60 Si2 C59 106.8(3) . . ? 
C58 Si2 C59 107.7(2) . . ? 
C21 N1 C2 124.5(3) . . ? 
C21 N1 Y1 113.1(3) . . ? 
C2 N1 Y1 122.3(2) . . ? 
C12 N2 C26 114.4(4) . . ? 
C12 N2 C27 115.5(4) . . ? 
C26 N2 C27 111.5(4) . . ? 
C25 N3 C22 105.2(3) . . ? 
C25 N3 Y1 139.2(3) . . ? 
C22 N3 Y1 114.5(3) . . ? 
C48 N4 C29 121.9(3) . . ? 
C48 N4 Y1 113.0(2) . . ? 
C29 N4 Y1 125.0(2) . . ? 
C54 N5 C39 116.3(4) . . ? 
C54 N5 C53 112.2(5) . . ? 
C39 N5 C53 113.5(4) . . ? 
C52 N6 C49 105.3(3) . . ? 
C52 N6 Y1 140.2(3) . . ? 
C49 N6 Y1 113.5(2) . . ? 
Si1 N7 Si2 120.31(19) . . ? 
Si1 N7 Y1 121.36(18) . . ? 
Si2 N7 Y1 118.33(16) . . ? 
C2 C1 C6 119.4(4) . . ? 
C2 C1 C11 121.9(3) . . ? 
C6 C1 C11 118.6(4) . . ? 
C1 C2 N1 127.0(4) . . ? 
C1 C2 C3 118.9(4) . . ? 
N1 C2 C3 113.9(4) . . ? 
C4 C3 C2 122.1(4) . . ? 
C4 C3 H3 119.0 . . ? 
C2 C3 H3 119.0 . . ? 
C3 C4 C5 120.8(4) . . ? 
C3 C4 H4 119.6 . . ? 
C5 C4 H4 119.6 . . ? 
C4 C5 C10 121.8(4) . . ? 
C4 C5 C6 118.4(4) . . ? 
C10 C5 C6 119.8(4) . . ? 
C7 C6 C5 117.4(4) . . ? 
C7 C6 C1 122.3(4) . . ? 
C5 C6 C1 120.3(4) . . ? 
C8 C7 C6 121.5(4) . . ? 
C8 C7 H7 119.3 . . ? 
C6 C7 H7 119.3 . . ? 
C7 C8 C9 120.3(5) . . ? 
C7 C8 H8 119.8 . . ? 
C9 C8 H8 119.8 . . ? 
C10 C9 C8 120.7(5) . . ? 
C10 C9 H9 119.6 . . ? 
C8 C9 H9 119.6 . . ? 
C9 C10 C5 120.2(5) . . ? 
C9 C10 H10 119.9 . . ? 
C5 C10 H10 119.9 . . ? 
C12 C11 C16 119.7(4) . . ? 
C12 C11 C1 121.1(4) . . ? 
C16 C11 C1 119.2(3) . . ? 
C11 C12 C13 119.4(4) . . ? 
C11 C12 N2 118.4(4) . . ? 
C13 C12 N2 122.2(4) . . ? 
C14 C13 C12 121.8(4) . . ? 
C14 C13 H13 119.1 . . ? 
C12 C13 H13 119.1 . . ? 
C13 C14 C15 120.5(5) . . ? 
C13 C14 H14 119.7 . . ? 
C15 C14 H14 119.7 . . ? 
C14 C15 C16 119.3(4) . . ? 
C14 C15 C20 121.0(4) . . ? 
C16 C15 C20 119.6(4) . . ? 
C17 C16 C15 118.2(4) . . ? 
C17 C16 C11 122.7(4) . . ? 
C15 C16 C11 119.1(4) . . ? 
C18 C17 C16 120.9(4) . . ? 
C18 C17 H17 119.5 . . ? 
C16 C17 H17 119.5 . . ? 
C17 C18 C19 121.1(4) . . ? 
C17 C18 H18 119.4 . . ? 
C19 C18 H18 119.4 . . ? 
C20 C19 C18 119.7(4) . . ? 
C20 C19 H19 120.2 . . ? 
C18 C19 H19 120.2 . . ? 
C19 C20 C15 120.5(4) . . ? 
C19 C20 H20 119.8 . . ? 
C15 C20 H20 119.8 . . ? 
N1 C21 C22 120.8(4) . . ? 
N1 C21 H21 119.6 . . ? 
C22 C21 H21 119.6 . . ? 
C23 C22 N3 109.7(4) . . ? 
C23 C22 C21 130.5(4) . . ? 
N3 C22 C21 119.5(4) . . ? 
C24 C23 C22 107.2(4) . . ? 
C24 C23 H23 126.4 . . ? 
C22 C23 H23 126.4 . . ? 
C23 C24 C25 106.0(4) . . ? 
C23 C24 H24 127.0 . . ? 
C25 C24 H24 127.0 . . ? 
N3 C25 C24 111.9(4) . . ? 
N3 C25 H25 124.1 . . ? 
C24 C25 H25 124.1 . . ? 
N2 C26 H26A 109.5 . . ? 
N2 C26 H26B 109.5 . . ? 
H26A C26 H26B 109.5 . . ? 
N2 C26 H26C 109.5 . . ? 
H26A C26 H26C 109.5 . . ? 
H26B C26 H26C 109.5 . . ? 
N2 C27 H27A 109.5 . . ? 
N2 C27 H27B 109.5 . . ? 
H27A C27 H27B 109.5 . . ? 
N2 C27 H27C 109.5 . . ? 
H27A C27 H27C 109.5 . . ? 
H27B C27 H27C 109.5 . . ? 
C29 C28 C33 118.5(4) . . ? 
C29 C28 C38 122.0(4) . . ? 
C33 C28 C38 119.4(3) . . ? 
C28 C29 C30 120.1(4) . . ? 
C28 C29 N4 126.0(4) . . ? 
C30 C29 N4 113.9(3) . . ? 
C31 C30 C29 121.9(4) . . ? 
C31 C30 H30 119.1 . . ? 
C29 C30 H30 119.1 . . ? 
C30 C31 C32 120.4(4) . . ? 
C30 C31 H31 119.8 . . ? 
C32 C31 H31 119.8 . . ? 
C31 C32 C37 121.8(4) . . ? 
C31 C32 C33 118.6(4) . . ? 
C37 C32 C33 119.5(4) . . ? 
C34 C33 C32 117.4(4) . . ? 
C34 C33 C28 122.2(4) . . ? 
C32 C33 C28 120.4(4) . . ? 
C35 C34 C33 121.4(4) . . ? 
C35 C34 H34 119.3 . . ? 
C33 C34 H34 119.3 . . ? 
C34 C35 C36 121.2(4) . . ? 
C34 C35 H35 119.4 . . ? 
C36 C35 H35 119.4 . . ? 
C37 C36 C35 119.7(4) . . ? 
C37 C36 H36 120.1 . . ? 
C35 C36 H36 120.1 . . ? 
C36 C37 C32 120.7(4) . . ? 
C36 C37 H37 119.7 . . ? 
C32 C37 H37 119.7 . . ? 
C39 C38 C43 119.4(4) . . ? 
C39 C38 C28 122.1(3) . . ? 
C43 C38 C28 118.4(3) . . ? 
C38 C39 C40 120.1(4) . . ? 
C38 C39 N5 118.9(4) . . ? 
C40 C39 N5 121.0(4) . . ? 
C41 C40 C39 121.6(4) . . ? 
C41 C40 H40 119.2 . . ? 
C39 C40 H40 119.2 . . ? 
C40 C41 C42 120.5(4) . . ? 
C40 C41 H41 119.8 . . ? 
C42 C41 H41 119.8 . . ? 
C41 C42 C47 122.9(4) . . ? 
C41 C42 C43 118.9(4) . . ? 
C47 C42 C43 118.2(4) . . ? 
C44 C43 C42 118.6(4) . . ? 
C44 C43 C38 121.9(4) . . ? 
C42 C43 C38 119.5(4) . . ? 
C45 C44 C43 121.0(5) . . ? 
C45 C44 H44 119.5 . . ? 
C43 C44 H44 119.5 . . ? 
C44 C45 C46 119.8(5) . . ? 
C44 C45 H45 120.1 . . ? 
C46 C45 H45 120.1 . . ? 
C47 C46 C45 120.3(5) . . ? 
C47 C46 H46 119.8 . . ? 
C45 C46 H46 119.8 . . ? 
C46 C47 C42 122.0(4) . . ? 
C46 C47 H47 119.0 . . ? 
C42 C47 H47 119.0 . . ? 
N4 C48 C49 120.6(3) . . ? 
N4 C48 H48 119.7 . . ? 
C49 C48 H48 119.7 . . ? 
C50 C49 N6 110.4(4) . . ? 
C50 C49 C48 128.9(4) . . ? 
N6 C49 C48 120.6(3) . . ? 
C49 C50 C51 106.5(4) . . ? 
C49 C50 H50 126.7 . . ? 
C51 C50 H50 126.7 . . ? 
C52 C51 C50 106.5(4) . . ? 
C52 C51 H51 126.7 . . ? 
C50 C51 H51 126.7 . . ? 
N6 C52 C51 111.2(4) . . ? 
N6 C52 H52 124.4 . . ? 
C51 C52 H52 124.4 . . ? 
N5 C53 H53A 109.5 . . ? 
N5 C53 H53B 109.5 . . ? 
H53A C53 H53B 109.5 . . ? 
N5 C53 H53C 109.5 . . ? 
H53A C53 H53C 109.5 . . ? 
H53B C53 H53C 109.5 . . ? 
N5 C54 H54A 109.5 . . ? 
N5 C54 H54B 109.5 . . ? 
H54A C54 H54B 109.5 . . ? 
N5 C54 H54C 109.5 . . ? 
H54A C54 H54C 109.5 . . ? 
H54B C54 H54C 109.5 . . ? 
Si1 C55 H55A 109.5 . . ? 
Si1 C55 H55B 109.5 . . ? 
H55A C55 H55B 109.5 . . ? 
Si1 C55 H55C 109.5 . . ? 
H55A C55 H55C 109.5 . . ? 
H55B C55 H55C 109.5 . . ? 
Si1 C56 H56A 109.5 . . ? 
Si1 C56 H56B 109.5 . . ? 
H56A C56 H56B 109.5 . . ? 
Si1 C56 H56C 109.5 . . ? 
H56A C56 H56C 109.5 . . ? 
H56B C56 H56C 109.5 . . ? 
Si1 C57 H57A 109.5 . . ? 
Si1 C57 H57B 109.5 . . ? 
H57A C57 H57B 109.5 . . ? 
Si1 C57 H57C 109.5 . . ? 
H57A C57 H57C 109.5 . . ? 
H57B C57 H57C 109.5 . . ? 
Si2 C58 H58A 109.5 . . ? 
Si2 C58 H58B 109.5 . . ? 
H58A C58 H58B 109.5 . . ? 
Si2 C58 H58C 109.5 . . ? 
H58A C58 H58C 109.5 . . ? 
H58B C58 H58C 109.5 . . ? 
Si2 C59 H59A 109.5 . . ? 
Si2 C59 H59B 109.5 . . ? 
H59A C59 H59B 109.5 . . ? 
Si2 C59 H59C 109.5 . . ? 
H59A C59 H59C 109.5 . . ? 
H59B C59 H59C 109.5 . . ? 
Si2 C60 H60A 109.5 . . ? 
Si2 C60 H60B 109.5 . . ? 
H60A C60 H60B 109.5 . . ? 
Si2 C60 H60C 109.5 . . ? 
H60A C60 H60C 109.5 . . ? 
H60B C60 H60C 109.5 . . ? 
C63 C62 C67 120.0 . . ? 
C63 C62 C61 120.6(5) . . ? 
C67 C62 C61 119.4(5) . . ? 
C62 C63 C64 120.0 . . ? 
C62 C63 H63A 120.0 . . ? 
C64 C63 H63A 120.0 . . ? 
C63 C64 C65 120.0 . . ? 
C63 C64 H64A 120.0 . . ? 
C65 C64 H64A 120.0 . . ? 
C66 C65 C64 120.0 . . ? 
C66 C65 H65A 120.0 . . ? 
C64 C65 H65A 120.0 . . ? 
C65 C66 C67 120.0 . . ? 
C65 C66 H66A 120.0 . . ? 
C67 C66 H66A 120.0 . . ? 
C66 C67 C62 120.0 . . ? 
C66 C67 H67A 120.0 . . ? 
C62 C67 H67A 120.0 . . ? 
C69 C68 H68A 109.5 . . ? 
C69 C68 H68B 109.5 . . ? 
H68A C68 H68B 109.5 . . ? 
C69 C68 H68C 109.5 . . ? 
H68A C68 H68C 109.5 . . ? 
H68B C68 H68C 109.5 . . ? 
C70 C69 C74 120.0 . . ? 
C70 C69 C68 119.1(7) . . ? 
C74 C69 C68 120.9(7) . . ? 
C69 C70 C71 120.0 . . ? 
C69 C70 H70A 120.0 . . ? 
C71 C70 H70A 120.0 . . ? 
C72 C71 C70 120.0 . . ? 
C72 C71 H71A 120.0 . . ? 
C70 C71 H71A 120.0 . . ? 
C71 C72 C73 120.0 . . ? 
C71 C72 H72A 120.0 . . ? 
C73 C72 H72A 120.0 . . ? 
C74 C73 C72 120.0 . . ? 
C74 C73 H73A 120.0 . . ? 
C72 C73 H73A 120.0 . . ? 
C73 C74 C69 120.0 . . ? 
C73 C74 H74A 120.0 . . ? 
C69 C74 H74A 120.0 . . ? 
  
loop_ 
 _geom_torsion_atom_site_label_1 
 _geom_torsion_atom_site_label_2 
 _geom_torsion_atom_site_label_3 
 _geom_torsion_atom_site_label_4 
 _geom_torsion 
 _geom_torsion_site_symmetry_1 
 _geom_torsion_site_symmetry_2 
 _geom_torsion_site_symmetry_3 
 _geom_torsion_site_symmetry_4 
 _geom_torsion_publ_flag 
N7 Y1 N1 C21 109.0(3) . . . . ? 
N3 Y1 N1 C21 -4.5(3) . . . . ? 
N6 Y1 N1 C21 -127.8(3) . . . . ? 
N4 Y1 N1 C21 -66.0(3) . . . . ? 
N7 Y1 N1 C2 -68.5(3) . . . . ? 
N3 Y1 N1 C2 178.0(3) . . . . ? 
N6 Y1 N1 C2 54.7(3) . . . . ? 
N4 Y1 N1 C2 116.5(3) . . . . ? 
N7 Y1 N3 C25 70.5(4) . . . . ? 
N6 Y1 N3 C25 -108.8(4) . . . . ? 
N1 Y1 N3 C25 170.4(4) . . . . ? 
N4 Y1 N3 C25 -40.4(4) . . . . ? 
N7 Y1 N3 C22 -95.7(3) . . . . ? 
N6 Y1 N3 C22 85.0(3) . . . . ? 
N1 Y1 N3 C22 4.3(3) . . . . ? 
N4 Y1 N3 C22 153.4(3) . . . . ? 
N7 Y1 N4 C48 114.9(3) . . . . ? 
N3 Y1 N4 C48 -126.7(3) . . . . ? 
N6 Y1 N4 C48 -2.4(3) . . . . ? 
N1 Y1 N4 C48 -70.2(3) . . . . ? 
N7 Y1 N4 C29 -61.4(3) . . . . ? 
N3 Y1 N4 C29 56.9(3) . . . . ? 
N6 Y1 N4 C29 -178.8(3) . . . . ? 
N1 Y1 N4 C29 113.5(3) . . . . ? 
N7 Y1 N6 C52 67.5(5) . . . . ? 
N3 Y1 N6 C52 -113.3(5) . . . . ? 
N1 Y1 N6 C52 -43.5(5) . . . . ? 
N4 Y1 N6 C52 169.2(5) . . . . ? 
N7 Y1 N6 C49 -99.0(3) . . . . ? 
N3 Y1 N6 C49 80.3(3) . . . . ? 
N1 Y1 N6 C49 150.1(3) . . . . ? 
N4 Y1 N6 C49 2.8(3) . . . . ? 
C56 Si1 N7 Si2 -45.8(3) . . . . ? 
C57 Si1 N7 Si2 -165.7(3) . . . . ? 
C55 Si1 N7 Si2 76.6(3) . . . . ? 
C56 Si1 N7 Y1 134.6(3) . . . . ? 
C57 Si1 N7 Y1 14.7(4) . . . . ? 
C55 Si1 N7 Y1 -103.0(3) . . . . ? 
C60 Si2 N7 Si1 -166.4(3) . . . . ? 
C58 Si2 N7 Si1 -47.3(3) . . . . ? 
C59 Si2 N7 Si1 74.6(3) . . . . ? 
C60 Si2 N7 Y1 13.1(3) . . . . ? 
C58 Si2 N7 Y1 132.3(2) . . . . ? 
C59 Si2 N7 Y1 -105.8(2) . . . . ? 
N3 Y1 N7 Si1 20.4(2) . . . . ? 
N6 Y1 N7 Si1 -160.38(18) . . . . ? 
N1 Y1 N7 Si1 -57.4(2) . . . . ? 
N4 Y1 N7 Si1 119.54(19) . . . . ? 
N3 Y1 N7 Si2 -159.20(17) . . . . ? 
N6 Y1 N7 Si2 20.1(2) . . . . ? 
N1 Y1 N7 Si2 123.09(18) . . . . ? 
N4 Y1 N7 Si2 -60.0(2) . . . . ? 
C6 C1 C2 N1 173.9(3) . . . . ? 
C11 C1 C2 N1 -5.4(6) . . . . ? 
C6 C1 C2 C3 -0.9(5) . . . . ? 
C11 C1 C2 C3 179.8(3) . . . . ? 
C21 N1 C2 C1 37.5(6) . . . . ? 
Y1 N1 C2 C1 -145.3(3) . . . . ? 
C21 N1 C2 C3 -147.5(4) . . . . ? 
Y1 N1 C2 C3 29.7(4) . . . . ? 
C1 C2 C3 C4 -0.2(6) . . . . ? 
N1 C2 C3 C4 -175.7(4) . . . . ? 
C2 C3 C4 C5 0.8(6) . . . . ? 
C3 C4 C5 C10 -178.7(4) . . . . ? 
C3 C4 C5 C6 -0.2(6) . . . . ? 
C4 C5 C6 C7 177.7(4) . . . . ? 
C10 C5 C6 C7 -3.8(5) . . . . ? 
C4 C5 C6 C1 -0.9(5) . . . . ? 
C10 C5 C6 C1 177.5(3) . . . . ? 
C2 C1 C6 C7 -177.1(3) . . . . ? 
C11 C1 C6 C7 2.2(5) . . . . ? 
C2 C1 C6 C5 1.5(5) . . . . ? 
C11 C1 C6 C5 -179.2(3) . . . . ? 
C5 C6 C7 C8 2.3(6) . . . . ? 
C1 C6 C7 C8 -179.1(4) . . . . ? 
C6 C7 C8 C9 1.0(6) . . . . ? 
C7 C8 C9 C10 -2.9(7) . . . . ? 
C8 C9 C10 C5 1.3(6) . . . . ? 
C4 C5 C10 C9 -179.5(4) . . . . ? 
C6 C5 C10 C9 2.1(6) . . . . ? 
C2 C1 C11 C12 68.3(5) . . . . ? 
C6 C1 C11 C12 -111.0(4) . . . . ? 
C2 C1 C11 C16 -111.1(4) . . . . ? 
C6 C1 C11 C16 69.6(5) . . . . ? 
C16 C11 C12 C13 1.9(7) . . . . ? 
C1 C11 C12 C13 -177.6(4) . . . . ? 
C16 C11 C12 N2 -179.2(4) . . . . ? 
C1 C11 C12 N2 1.4(6) . . . . ? 
C26 N2 C12 C11 77.9(5) . . . . ? 
C27 N2 C12 C11 -150.5(4) . . . . ? 
C26 N2 C12 C13 -103.1(5) . . . . ? 
C27 N2 C12 C13 28.4(6) . . . . ? 
C11 C12 C13 C14 -3.4(8) . . . . ? 
N2 C12 C13 C14 177.7(5) . . . . ? 
C12 C13 C14 C15 1.5(9) . . . . ? 
C13 C14 C15 C16 1.8(9) . . . . ? 
C13 C14 C15 C20 -179.2(6) . . . . ? 
C14 C15 C16 C17 176.9(5) . . . . ? 
C20 C15 C16 C17 -2.1(7) . . . . ? 
C14 C15 C16 C11 -3.2(7) . . . . ? 
C20 C15 C16 C11 177.8(4) . . . . ? 
C12 C11 C16 C17 -178.8(4) . . . . ? 
C1 C11 C16 C17 0.7(6) . . . . ? 
C12 C11 C16 C15 1.4(6) . . . . ? 
C1 C11 C16 C15 -179.2(4) . . . . ? 
C15 C16 C17 C18 1.0(6) . . . . ? 
C11 C16 C17 C18 -178.9(4) . . . . ? 
C16 C17 C18 C19 1.0(7) . . . . ? 
C17 C18 C19 C20 -1.8(7) . . . . ? 
C18 C19 C20 C15 0.7(8) . . . . ? 
C14 C15 C20 C19 -177.7(5) . . . . ? 
C16 C15 C20 C19 1.3(8) . . . . ? 
C2 N1 C21 C22 -178.3(4) . . . . ? 
Y1 N1 C21 C22 4.2(5) . . . . ? 
C25 N3 C22 C23 0.3(5) . . . . ? 
Y1 N3 C22 C23 171.0(3) . . . . ? 
C25 N3 C22 C21 -174.7(4) . . . . ? 
Y1 N3 C22 C21 -4.0(5) . . . . ? 
N1 C21 C22 C23 -174.2(4) . . . . ? 
N1 C21 C22 N3 -0.4(6) . . . . ? 
N3 C22 C23 C24 -0.1(5) . . . . ? 
C21 C22 C23 C24 174.2(4) . . . . ? 
C22 C23 C24 C25 -0.2(5) . . . . ? 
C22 N3 C25 C24 -0.5(5) . . . . ? 
Y1 N3 C25 C24 -167.5(3) . . . . ? 
C23 C24 C25 N3 0.5(5) . . . . ? 
C33 C28 C29 C30 0.2(6) . . . . ? 
C38 C28 C29 C30 178.8(4) . . . . ? 
C33 C28 C29 N4 177.9(3) . . . . ? 
C38 C28 C29 N4 -3.5(6) . . . . ? 
C48 N4 C29 C28 37.1(6) . . . . ? 
Y1 N4 C29 C28 -146.8(3) . . . . ? 
C48 N4 C29 C30 -145.0(4) . . . . ? 
Y1 N4 C29 C30 31.0(4) . . . . ? 
C28 C29 C30 C31 -1.0(6) . . . . ? 
N4 C29 C30 C31 -178.9(4) . . . . ? 
C29 C30 C31 C32 0.2(6) . . . . ? 
C30 C31 C32 C37 -178.3(4) . . . . ? 
C30 C31 C32 C33 1.4(6) . . . . ? 
C31 C32 C33 C34 178.8(4) . . . . ? 
C37 C32 C33 C34 -1.5(5) . . . . ? 
C31 C32 C33 C28 -2.2(6) . . . . ? 
C37 C32 C33 C28 177.5(4) . . . . ? 
C29 C28 C33 C34 -179.7(4) . . . . ? 
C38 C28 C33 C34 1.7(6) . . . . ? 
C29 C28 C33 C32 1.4(6) . . . . ? 
C38 C28 C33 C32 -177.3(3) . . . . ? 
C32 C33 C34 C35 1.1(6) . . . . ? 
C28 C33 C34 C35 -177.9(4) . . . . ? 
C33 C34 C35 C36 0.5(6) . . . . ? 
C34 C35 C36 C37 -1.7(6) . . . . ? 
C35 C36 C37 C32 1.2(6) . . . . ? 
C31 C32 C37 C36 180.0(4) . . . . ? 
C33 C32 C37 C36 0.4(6) . . . . ? 
C29 C28 C38 C39 74.8(5) . . . . ? 
C33 C28 C38 C39 -106.6(5) . . . . ? 
C29 C28 C38 C43 -102.1(5) . . . . ? 
C33 C28 C38 C43 76.5(5) . . . . ? 
C43 C38 C39 C40 2.2(6) . . . . ? 
C28 C38 C39 C40 -174.7(4) . . . . ? 
C43 C38 C39 N5 179.9(4) . . . . ? 
C28 C38 C39 N5 3.1(6) . . . . ? 
C54 N5 C39 C38 -141.7(5) . . . . ? 
C53 N5 C39 C38 85.8(6) . . . . ? 
C54 N5 C39 C40 36.0(7) . . . . ? 
C53 N5 C39 C40 -96.4(6) . . . . ? 
C38 C39 C40 C41 -0.6(7) . . . . ? 
N5 C39 C40 C41 -178.4(4) . . . . ? 
C39 C40 C41 C42 -0.8(7) . . . . ? 
C40 C41 C42 C47 -179.2(5) . . . . ? 
C40 C41 C42 C43 0.6(7) . . . . ? 
C41 C42 C43 C44 179.5(4) . . . . ? 
C47 C42 C43 C44 -0.8(6) . . . . ? 
C41 C42 C43 C38 1.0(6) . . . . ? 
C47 C42 C43 C38 -179.3(4) . . . . ? 
C39 C38 C43 C44 179.2(4) . . . . ? 
C28 C38 C43 C44 -3.8(6) . . . . ? 
C39 C38 C43 C42 -2.3(6) . . . . ? 
C28 C38 C43 C42 174.6(4) . . . . ? 
C42 C43 C44 C45 1.0(8) . . . . ? 
C38 C43 C44 C45 179.4(5) . . . . ? 
C43 C44 C45 C46 -1.4(10) . . . . ? 
C44 C45 C46 C47 1.7(10) . . . . ? 
C45 C46 C47 C42 -1.5(10) . . . . ? 
C41 C42 C47 C46 -179.2(5) . . . . ? 
C43 C42 C47 C46 1.1(8) . . . . ? 
C29 N4 C48 C49 178.3(3) . . . . ? 
Y1 N4 C48 C49 1.8(4) . . . . ? 
C52 N6 C49 C50 1.9(5) . . . . ? 
Y1 N6 C49 C50 172.9(3) . . . . ? 
C52 N6 C49 C48 -174.2(4) . . . . ? 
Y1 N6 C49 C48 -3.1(5) . . . . ? 
N4 C48 C49 C50 -174.4(4) . . . . ? 
N4 C48 C49 N6 0.9(6) . . . . ? 
N6 C49 C50 C51 -1.7(5) . . . . ? 
C48 C49 C50 C51 174.0(4) . . . . ? 
C49 C50 C51 C52 0.8(6) . . . . ? 
C49 N6 C52 C51 -1.4(5) . . . . ? 
Y1 N6 C52 C51 -168.5(4) . . . . ? 
C50 C51 C52 N6 0.4(6) . . . . ? 
C67 C62 C63 C64 0.0 . . . . ? 
C61 C62 C63 C64 -179.98(9) . . . . ? 
C62 C63 C64 C65 0.0 . . . . ? 
C63 C64 C65 C66 0.0 . . . . ? 
C64 C65 C66 C67 0.0 . . . . ? 
C65 C66 C67 C62 0.0 . . . . ? 
C63 C62 C67 C66 0.0 . . . . ? 
C61 C62 C67 C66 179.98(9) . . . . ? 
C74 C69 C70 C71 0.0 . . . . ? 
C68 C69 C70 C71 179.98(8) . . . . ? 
C69 C70 C71 C72 0.0 . . . . ? 
C70 C71 C72 C73 0.0 . . . . ? 
C71 C72 C73 C74 0.0 . . . . ? 
C72 C73 C74 C69 0.0 . . . . ? 
C70 C69 C74 C73 0.0 . . . . ? 
C68 C69 C74 C73 -179.98(9) . . . . ? 
  
_diffrn_measured_fraction_theta_max    0.999 
_diffrn_reflns_theta_full              27.00 
_diffrn_measured_fraction_theta_full   0.999 
_refine_diff_density_max    0.498 
_refine_diff_density_min   -0.465 
_refine_diff_density_rms    0.060 

#===END
 
data_compound4 
 
_audit_creation_method            SHELXL-97 
_chemical_name_systematic 
; 
 ? 
; 
_chemical_name_common             ? 
_chemical_melting_point           ? 
_chemical_formula_moiety          'C67 H70 N7 Si2 Yb' 
_chemical_formula_sum 
 'C67 H70 N7 Si2 Yb' 
_chemical_formula_weight          1202.52 
 
loop_ 
 _atom_type_symbol 
 _atom_type_description 
 _atom_type_scat_dispersion_real 
 _atom_type_scat_dispersion_imag 
 _atom_type_scat_source 
 'C'  'C'   0.0033   0.0016 
 'International Tables Vol C Tables 4.2.6.8 and 6.1.1.4' 
 'H'  'H'   0.0000   0.0000 
 'International Tables Vol C Tables 4.2.6.8 and 6.1.1.4' 
 'N'  'N'   0.0061   0.0033 
 'International Tables Vol C Tables 4.2.6.8 and 6.1.1.4' 
 'Si'  'Si'   0.0817   0.0704 
 'International Tables Vol C Tables 4.2.6.8 and 6.1.1.4' 
 'Yb'  'Yb'  -0.3850   5.5486 
 'International Tables Vol C Tables 4.2.6.8 and 6.1.1.4' 
 
_symmetry_cell_setting            orthorhombic 
_symmetry_space_group_name_H-M    'P 21 21 21' 
 
loop_ 
 _symmetry_equiv_pos_as_xyz 
 'x, y, z' 
 'x+1/2, -y+1/2, -z' 
 '-x, y+1/2, -z+1/2' 
 '-x+1/2, -y, z+1/2' 
 
_cell_length_a                    11.4379(3) 
_cell_length_b                    21.5061(5) 
_cell_length_c                    24.2427(7) 
_cell_angle_alpha                 90.00 
_cell_angle_beta                  90.00 
_cell_angle_gamma                 90.00 
_cell_volume                      5963.3(3) 
_cell_formula_units_Z             4 
_cell_measurement_temperature     113(2) 
_cell_measurement_reflns_used     12204 
_cell_measurement_theta_min       2.5 
_cell_measurement_theta_max       25.0 
 
_exptl_crystal_description        block 
_exptl_crystal_colour             yellow 
_exptl_crystal_size_max           0.12 
_exptl_crystal_size_mid           0.10 
_exptl_crystal_size_min           0.08 
_exptl_crystal_density_meas       ? 
_exptl_crystal_density_diffrn     1.339 
_exptl_crystal_density_method     'not measured' 
_exptl_crystal_F_000              2476 
_exptl_absorpt_coefficient_mu     1.655 
_exptl_absorpt_correction_type    multi-scan 
_exptl_absorpt_correction_T_min   0.8261 
_exptl_absorpt_correction_T_max   0.8790 
_exptl_absorpt_process_details    'Jacobson, R. (1998) Private communication' 
 
_exptl_special_details 
; 
 ? 
; 
 
_diffrn_ambient_temperature       113(2) 
_diffrn_radiation_wavelength      0.71070 
_diffrn_radiation_type            MoK\a 
_diffrn_radiation_source          'rotating anode' 
_diffrn_radiation_monochromator   confocal 
_diffrn_measurement_device_type   'Rigaku Saturn' 
_diffrn_measurement_method        \w 
_diffrn_detector_area_resol_mean  7.31 
_diffrn_standards_number          ? 
_diffrn_standards_interval_count  ? 
_diffrn_standards_interval_time   ? 
_diffrn_standards_decay_%         ? 
_diffrn_reflns_number             37468 
_diffrn_reflns_av_R_equivalents   0.0470 
_diffrn_reflns_av_sigmaI/netI     0.0701 
_diffrn_reflns_limit_h_min        -12 
_diffrn_reflns_limit_h_max        14 
_diffrn_reflns_limit_k_min        -28 
_diffrn_reflns_limit_k_max        28 
_diffrn_reflns_limit_l_min        -22 
_diffrn_reflns_limit_l_max        31 
_diffrn_reflns_theta_min          1.68 
_diffrn_reflns_theta_max          27.86 
_reflns_number_total              14022 
_reflns_number_gt                 12736 
_reflns_threshold_expression      >2sigma(I) 
 
_computing_data_collection        CrystalClear 
_computing_cell_refinement        CrystalClear 
_computing_data_reduction         CrystalStructure 
_computing_structure_solution     'SHELXS-97 (Sheldrick, 1990)' 
_computing_structure_refinement   'SHELXL-97 (Sheldrick, 1997)' 
_computing_molecular_graphics     ? 
_computing_publication_material   'CrystalStructure 3.7.0' 
 
_refine_special_details 
; 
 Refinement of F^2^ against ALL reflections.  The weighted R-factor wR and 
 goodness of fit S are based on F^2^, conventional R-factors R are based 
 on F, with F set to zero for negative F^2^. The threshold expression of 
 F^2^ > 2sigma(F^2^) is used only for calculating R-factors(gt) etc. and is 
 not relevant to the choice of reflections for refinement.  R-factors based 
 on F^2^ are statistically about twice as large as those based on F, and R- 
 factors based on ALL data will be even larger. 
; 
 
_refine_ls_structure_factor_coef  Fsqd  
_refine_ls_matrix_type            full 
_refine_ls_weighting_scheme       calc  
_refine_ls_weighting_details 
 'calc w=1/[\s^2^(Fo^2^)+(0.0279P)^2^+0.0000P] where P=(Fo^2^+2Fc^2^)/3' 
_atom_sites_solution_primary      direct 
_atom_sites_solution_secondary    difmap 
_atom_sites_solution_hydrogens    geom 
_refine_ls_hydrogen_treatment     constr 
_refine_ls_extinction_method      none 
_refine_ls_extinction_coef        ? 
_refine_ls_abs_structure_details 
 'Flack H D (1983), Acta Cryst. A39, 876-881' 
_refine_ls_abs_structure_Flack    0.006(6) 
_refine_ls_number_reflns          14022 
_refine_ls_number_parameters      744 
_refine_ls_number_restraints      8 
_refine_ls_R_factor_all           0.0478 
_refine_ls_R_factor_gt            0.0412 
_refine_ls_wR_factor_ref          0.0799 
_refine_ls_wR_factor_gt           0.0771 
_refine_ls_goodness_of_fit_ref    1.036 
_refine_ls_restrained_S_all       1.036 
_refine_ls_shift/su_max           0.003 
_refine_ls_shift/su_mean          0.000 
 
loop_ 
 _atom_site_label 
 _atom_site_type_symbol 
 _atom_site_fract_x 
 _atom_site_fract_y 
 _atom_site_fract_z 
 _atom_site_U_iso_or_equiv 
 _atom_site_adp_type 
 _atom_site_occupancy 
 _atom_site_symmetry_multiplicity 
 _atom_site_calc_flag 
 _atom_site_refinement_flags 
 _atom_site_disorder_assembly 
 _atom_site_disorder_group 
Yb1 Yb 0.197294(15) 0.993525(7) 0.086620(7) 0.02540(5) Uani 1 1 d . . . 
Si1 Si 0.40127(12) 1.10646(5) 0.09101(6) 0.0363(3) Uani 1 1 d . . . 
Si2 Si 0.27631(13) 1.08154(6) 0.19790(6) 0.0408(4) Uani 1 1 d . . . 
N1 N 0.0924(3) 1.04059(15) 0.01254(13) 0.0258(8) Uani 1 1 d . . . 
N2 N -0.1784(5) 0.97131(17) -0.00472(17) 0.0511(13) Uani 1 1 d . . . 
N3 N 0.2640(3) 0.94976(15) 0.00680(15) 0.0315(9) Uani 1 1 d . . . 
N4 N 0.2305(3) 0.89923(16) 0.13628(14) 0.0279(9) Uani 1 1 d . . . 
N6 N 0.0255(3) 0.96665(16) 0.12655(15) 0.0296(8) Uani 1 1 d . . . 
N5 N 0.1941(4) 0.78466(16) 0.05283(14) 0.0384(9) Uani 1 1 d . . . 
N7 N 0.2979(4) 1.06473(15) 0.12863(14) 0.0315(8) Uani 1 1 d . . . 
C1 C -0.0924(4) 1.09620(17) -0.01469(15) 0.0220(8) Uani 1 1 d . . . 
C2 C 0.0045(4) 1.08831(19) 0.01795(16) 0.0253(9) Uani 1 1 d . . . 
C3 C 0.0242(4) 1.12864(19) 0.06350(17) 0.0286(10) Uani 1 1 d . . . 
H3 H 0.0911 1.1222 0.0860 0.034 Uiso 1 1 calc R . . 
C4 C -0.0502(4) 1.17629(19) 0.07580(17) 0.0322(10) Uani 1 1 d . . . 
H4 H -0.0344 1.2028 0.1062 0.039 Uiso 1 1 calc R . . 
C5 C -0.1510(4) 1.18602(19) 0.04310(18) 0.0296(10) Uani 1 1 d . . . 
C6 C -0.1733(4) 1.14506(18) -0.00194(16) 0.0253(9) Uani 1 1 d . . . 
C7 C -0.2758(4) 1.15557(19) -0.03344(17) 0.0282(10) Uani 1 1 d . . . 
H7 H -0.2938 1.1283 -0.0631 0.034 Uiso 1 1 calc R . . 
C8 C -0.3497(4) 1.2043(2) -0.0220(2) 0.0361(11) Uani 1 1 d . . . 
H8 H -0.4173 1.2106 -0.0441 0.043 Uiso 1 1 calc R . . 
C9 C -0.3260(5) 1.24476(19) 0.0219(2) 0.0401(12) Uani 1 1 d . . . 
H9 H -0.3772 1.2785 0.0294 0.048 Uiso 1 1 calc R . . 
C10 C -0.2297(4) 1.2358(2) 0.05390(19) 0.0350(11) Uani 1 1 d . . . 
H10 H -0.2148 1.2632 0.0839 0.042 Uiso 1 1 calc R . . 
C11 C -0.1156(4) 1.05512(18) -0.06417(17) 0.0257(9) Uani 1 1 d . . . 
C12 C -0.1540(4) 0.9948(2) -0.05867(17) 0.0341(9) Uani 1 1 d . . . 
C13 C -0.1651(5) 0.9569(2) -0.1065(2) 0.0492(15) Uani 1 1 d . . . 
H13 H -0.1910 0.9152 -0.1025 0.059 Uiso 1 1 calc R . . 
C14 C -0.1399(4) 0.9785(2) -0.1575(2) 0.0435(13) Uani 1 1 d . . . 
H14 H -0.1469 0.9515 -0.1884 0.052 Uiso 1 1 calc R . . 
C15 C -0.1032(4) 1.0405(2) -0.16568(18) 0.0338(11) Uani 1 1 d . . . 
C16 C -0.0915(4) 1.0795(2) -0.11824(16) 0.0288(10) Uani 1 1 d . . . 
C17 C -0.0538(5) 1.1415(2) -0.12653(19) 0.0443(13) Uani 1 1 d . . . 
H17 H -0.0445 1.1681 -0.0956 0.053 Uiso 1 1 calc R . . 
C18 C -0.0304(7) 1.1638(3) -0.1785(2) 0.075(2) Uani 1 1 d . . . 
H18 H -0.0062 1.2057 -0.1834 0.090 Uiso 1 1 calc R . . 
C19 C -0.0425(7) 1.1245(3) -0.2242(2) 0.079(2) Uani 1 1 d . . . 
H19 H -0.0247 1.1398 -0.2600 0.095 Uiso 1 1 calc R . . 
C20 C -0.0792(5) 1.0650(3) -0.2183(2) 0.0542(15) Uani 1 1 d . . . 
H20 H -0.0888 1.0395 -0.2500 0.065 Uiso 1 1 calc R . . 
C21 C 0.1267(4) 1.02125(17) -0.03604(16) 0.0259(9) Uani 1 1 d . . . 
H21 H 0.0933 1.0387 -0.0684 0.031 Uiso 1 1 calc R . . 
C22 C 0.2131(4) 0.97463(17) -0.04066(16) 0.0279(9) Uani 1 1 d . . . 
C23 C 0.2684(4) 0.9516(2) -0.0876(2) 0.0427(12) Uani 1 1 d . . . 
H23 H 0.2498 0.9613 -0.1249 0.051 Uiso 1 1 calc R . . 
C24 C 0.3557(5) 0.9120(3) -0.0694(2) 0.0566(16) Uani 1 1 d . . . 
H24 H 0.4087 0.8890 -0.0917 0.068 Uiso 1 1 calc R . . 
C25 C 0.3508(5) 0.9124(2) -0.0121(2) 0.0466(14) Uani 1 1 d . . . 
H25 H 0.4019 0.8893 0.0110 0.056 Uiso 1 1 calc R . . 
C26 C -0.1479(8) 0.9081(3) 0.0051(3) 0.096(3) Uani 1 1 d . . . 
H26A H -0.2023 0.8808 -0.0147 0.144 Uiso 1 1 calc R . . 
H26B H -0.1524 0.8994 0.0447 0.144 Uiso 1 1 calc R . . 
H26C H -0.0681 0.9005 -0.0080 0.144 Uiso 1 1 calc R . . 
C27 C -0.2886(6) 0.9877(4) 0.0168(3) 0.118(3) Uani 1 1 d . . . 
H27A H -0.3002 1.0327 0.0129 0.177 Uiso 1 1 calc R . . 
H27B H -0.2922 0.9763 0.0559 0.177 Uiso 1 1 calc R . . 
H27C H -0.3500 0.9656 -0.0035 0.177 Uiso 1 1 calc R . . 
C28 C 0.3578(4) 0.8042(2) 0.13935(16) 0.0262(9) Uani 1 1 d . . . 
C29 C 0.3401(4) 0.8671(2) 0.13725(17) 0.0273(10) Uani 1 1 d . . . 
C30 C 0.4386(4) 0.9079(2) 0.13199(17) 0.0323(11) Uani 1 1 d . . . 
H30 H 0.4257 0.9515 0.1302 0.039 Uiso 1 1 calc R . . 
C31 C 0.5498(4) 0.8860(2) 0.12953(19) 0.0370(11) Uani 1 1 d . . . 
H31 H 0.6131 0.9144 0.1266 0.044 Uiso 1 1 calc R . . 
C32 C 0.5723(4) 0.8215(2) 0.13120(18) 0.0331(11) Uani 1 1 d . . . 
C33 C 0.4755(4) 0.78043(19) 0.13528(16) 0.0271(9) Uani 1 1 d . . . 
C34 C 0.4991(4) 0.7154(2) 0.13451(17) 0.0337(11) Uani 1 1 d . . . 
H34 H 0.4360 0.6868 0.1362 0.040 Uiso 1 1 calc R . . 
C35 C 0.6117(5) 0.6935(3) 0.13130(19) 0.0447(14) Uani 1 1 d . . . 
H35 H 0.6256 0.6500 0.1304 0.054 Uiso 1 1 calc R . . 
C36 C 0.7067(5) 0.7351(3) 0.1294(2) 0.0517(14) Uani 1 1 d . . . 
H36 H 0.7842 0.7194 0.1282 0.062 Uiso 1 1 calc R . . 
C37 C 0.6881(5) 0.7983(2) 0.12907(18) 0.0421(11) Uani 1 1 d . . . 
H37 H 0.7525 0.8261 0.1275 0.051 Uiso 1 1 calc R . . 
C38 C 0.2601(4) 0.7586(2) 0.14532(17) 0.0288(10) Uani 1 1 d . . . 
C39 C 0.1796(4) 0.7503(2) 0.10237(18) 0.0377(11) Uani 1 1 d . . . 
C40 C 0.0860(5) 0.7080(3) 0.1098(2) 0.0597(17) Uani 1 1 d . . . 
H40 H 0.0300 0.7034 0.0812 0.072 Uiso 1 1 calc R . . 
C41 C 0.0735(6) 0.6733(3) 0.1573(3) 0.067(2) Uani 1 1 d . . . 
H41 H 0.0098 0.6453 0.1608 0.080 Uiso 1 1 calc R . . 
C42 C 0.1548(5) 0.6794(2) 0.2005(2) 0.0456(14) Uani 1 1 d . . . 
C43 C 0.2470(4) 0.7232(2) 0.19530(19) 0.0298(10) Uani 1 1 d . . . 
C44 C 0.3221(4) 0.73066(19) 0.24112(18) 0.0335(10) Uani 1 1 d . . . 
H44 H 0.3834 0.7604 0.2394 0.040 Uiso 1 1 calc R . . 
C45 C 0.3084(5) 0.6957(2) 0.28814(18) 0.0388(11) Uani 1 1 d . . . 
H45 H 0.3594 0.7021 0.3185 0.047 Uiso 1 1 calc R . . 
C46 C 0.2199(5) 0.6508(2) 0.2917(2) 0.0463(13) Uani 1 1 d . . . 
H46 H 0.2129 0.6259 0.3239 0.056 Uiso 1 1 calc R . . 
C47 C 0.1450(5) 0.6430(3) 0.2496(2) 0.0542(15) Uani 1 1 d . . . 
H47 H 0.0846 0.6128 0.2525 0.065 Uiso 1 1 calc R . . 
C48 C 0.1387(4) 0.8814(2) 0.16407(19) 0.0348(11) Uani 1 1 d . . . 
H48 H 0.1436 0.8456 0.1870 0.042 Uiso 1 1 calc R . . 
C49 C 0.0317(4) 0.9145(2) 0.16053(17) 0.0305(10) Uani 1 1 d . . . 
C50 C -0.0717(5) 0.9070(2) 0.1889(2) 0.0425(12) Uani 1 1 d . . . 
H50 H -0.0897 0.8748 0.2143 0.051 Uiso 1 1 calc R . . 
C51 C -0.1453(5) 0.9561(2) 0.1733(2) 0.0466(14) Uani 1 1 d . . . 
H51 H -0.2223 0.9641 0.1862 0.056 Uiso 1 1 calc R . . 
C52 C -0.0824(4) 0.9905(2) 0.13485(18) 0.0417(11) Uani 1 1 d . . . 
H52 H -0.1116 1.0264 0.1167 0.050 Uiso 1 1 calc R . . 
C53 C 0.0889(6) 0.8007(3) 0.0233(2) 0.0685(19) Uani 1 1 d . . . 
H53A H 0.0539 0.7629 0.0078 0.103 Uiso 1 1 calc R . . 
H53B H 0.1079 0.8296 -0.0066 0.103 Uiso 1 1 calc R . . 
H53C H 0.0333 0.8203 0.0486 0.103 Uiso 1 1 calc R . . 
C54 C 0.2825(6) 0.7597(2) 0.0165(2) 0.0562(16) Uani 1 1 d . . . 
H54A H 0.3532 0.7502 0.0377 0.084 Uiso 1 1 calc R . . 
H54B H 0.3011 0.7903 -0.0121 0.084 Uiso 1 1 calc R . . 
H54C H 0.2533 0.7215 -0.0008 0.084 Uiso 1 1 calc R . . 
C55 C 0.3840(6) 1.0935(3) 0.0153(2) 0.066(2) Uani 1 1 d . . . 
H55A H 0.3909 1.0490 0.0073 0.099 Uiso 1 1 calc R . . 
H55B H 0.4451 1.1163 -0.0046 0.099 Uiso 1 1 calc R . . 
H55C H 0.3070 1.1084 0.0035 0.099 Uiso 1 1 calc R . . 
C56 C 0.3898(6) 1.1929(2) 0.1024(3) 0.069(2) Uani 1 1 d . . . 
H56A H 0.3128 1.2074 0.0903 0.104 Uiso 1 1 calc R . . 
H56B H 0.4507 1.2141 0.0810 0.104 Uiso 1 1 calc R . . 
H56C H 0.4001 1.2021 0.1416 0.104 Uiso 1 1 calc R . . 
C57 C 0.5521(5) 1.0832(3) 0.1090(2) 0.0525(15) Uani 1 1 d . . . 
H57A H 0.5642 1.0883 0.1488 0.079 Uiso 1 1 calc R . . 
H57B H 0.6078 1.1093 0.0889 0.079 Uiso 1 1 calc R . . 
H57C H 0.5642 1.0395 0.0990 0.079 Uiso 1 1 calc R . . 
C58 C 0.2000(9) 1.0165(3) 0.2351(2) 0.117(3) Uani 1 1 d . . . 
H58A H 0.1220 1.0104 0.2193 0.176 Uiso 1 1 calc R . . 
H58B H 0.1926 1.0270 0.2743 0.176 Uiso 1 1 calc R . . 
H58C H 0.2455 0.9781 0.2313 0.176 Uiso 1 1 calc R . . 
C59 C 0.1808(8) 1.1522(3) 0.2080(3) 0.101(3) Uani 1 1 d . . . 
H59A H 0.2155 1.1879 0.1888 0.151 Uiso 1 1 calc R . . 
H59B H 0.1745 1.1615 0.2475 0.151 Uiso 1 1 calc R . . 
H59C H 0.1027 1.1440 0.1930 0.151 Uiso 1 1 calc R . . 
C60 C 0.4135(6) 1.0937(4) 0.2377(2) 0.089(2) Uani 1 1 d . . . 
H60A H 0.4690 1.0603 0.2291 0.133 Uiso 1 1 calc R . . 
H60B H 0.3960 1.0932 0.2772 0.133 Uiso 1 1 calc R . . 
H60C H 0.4479 1.1338 0.2276 0.133 Uiso 1 1 calc R . . 
C61 C 0.2418(7) 0.8809(5) 0.3369(5) 0.080(5) Uani 0.557(9) 1 d PD A 1 
H61A H 0.2826 0.8436 0.3241 0.120 Uiso 0.557(9) 1 calc PR A 1 
H61B H 0.2629 0.8891 0.3754 0.120 Uiso 0.557(9) 1 calc PR A 1 
H61C H 0.2646 0.9165 0.3141 0.120 Uiso 0.557(9) 1 calc PR A 1 
C62 C 0.1126(6) 0.8711(4) 0.3327(4) 0.047(3) Uani 0.557(9) 1 d PGD A 1 
C63 C 0.0685(8) 0.8151(3) 0.3131(5) 0.033(3) Uani 0.557(9) 1 d PGD A 1 
H63A H 0.1205 0.7829 0.3021 0.040 Uiso 0.557(9) 1 calc PR A 1 
C64 C -0.0516(9) 0.8061(4) 0.3095(7) 0.049(5) Uani 0.557(9) 1 d PG A 1 
H64A H -0.0817 0.7678 0.2961 0.058 Uiso 0.557(9) 1 calc PR A 1 
C65 C -0.1276(6) 0.8532(6) 0.3256(6) 0.056(4) Uani 0.557(9) 1 d PG A 1 
H65A H -0.2097 0.8471 0.3231 0.068 Uiso 0.557(9) 1 calc PR A 1 
C66 C -0.0836(8) 0.9092(4) 0.3452(4) 0.052(3) Uani 0.557(9) 1 d PG A 1 
H66A H -0.1355 0.9414 0.3562 0.062 Uiso 0.557(9) 1 calc PR A 1 
C67 C 0.0365(8) 0.9182(3) 0.3488(4) 0.050(4) Uani 0.557(9) 1 d PGD A 1 
H67A H 0.0667 0.9564 0.3622 0.060 Uiso 0.557(9) 1 calc PR A 1 
C68 C -0.0463(14) 0.9757(5) 0.3655(8) 0.097(7) Uani 0.443(9) 1 d PD A 2 
H68A H 0.0245 0.9988 0.3752 0.146 Uiso 0.443(9) 1 calc PR A 2 
H68B H -0.0981 0.9735 0.3977 0.146 Uiso 0.443(9) 1 calc PR A 2 
H68C H -0.0868 0.9968 0.3352 0.146 Uiso 0.443(9) 1 calc PR A 2 
C69 C -0.0137(10) 0.9112(4) 0.3478(6) 0.056(6) Uani 0.443(9) 1 d PGD A 2 
C70 C 0.1035(9) 0.8951(6) 0.3425(6) 0.070(6) Uani 0.443(9) 1 d PGD A 2 
H70A H 0.1626 0.9236 0.3535 0.084 Uiso 0.443(9) 1 calc PR A 2 
C71 C 0.1342(10) 0.8375(6) 0.3210(5) 0.056(4) Uani 0.443(9) 1 d PG A 2 
H71A H 0.2143 0.8265 0.3173 0.068 Uiso 0.443(9) 1 calc PR A 2 
C72 C 0.0477(15) 0.7959(5) 0.3048(7) 0.059(6) Uani 0.443(9) 1 d PG A 2 
H72A H 0.0687 0.7565 0.2901 0.070 Uiso 0.443(9) 1 calc PR A 2 
C73 C -0.0695(13) 0.8119(6) 0.3102(10) 0.084(11) Uani 0.443(9) 1 d PG A 2 
H73A H -0.1286 0.7835 0.2992 0.101 Uiso 0.443(9) 1 calc PR A 2 
C74 C -0.1002(8) 0.8696(6) 0.3317(8) 0.063(6) Uani 0.443(9) 1 d PGD A 2 
H74A H -0.1803 0.8805 0.3354 0.076 Uiso 0.443(9) 1 calc PR A 2 
 
loop_ 
 _atom_site_aniso_label 
 _atom_site_aniso_U_11 
 _atom_site_aniso_U_22 
 _atom_site_aniso_U_33 
 _atom_site_aniso_U_23 
 _atom_site_aniso_U_13 
 _atom_site_aniso_U_12 
Yb1 0.02750(9) 0.02471(8) 0.02401(8) 0.00103(7) -0.00014(8) -0.00039(8) 
Si1 0.0348(7) 0.0280(6) 0.0460(8) 0.0002(6) -0.0025(7) -0.0070(5) 
Si2 0.0468(10) 0.0391(7) 0.0365(7) -0.0104(6) -0.0045(7) -0.0041(6) 
N1 0.030(2) 0.0248(17) 0.0223(17) 0.0014(13) 0.0025(16) -0.0020(15) 
N2 0.082(4) 0.0233(18) 0.048(2) 0.0046(16) 0.030(3) 0.002(2) 
N3 0.039(2) 0.0261(18) 0.029(2) 0.0012(15) 0.0055(17) 0.0062(15) 
N4 0.031(2) 0.0275(19) 0.0255(19) 0.0005(15) -0.0053(16) -0.0030(16) 
N6 0.028(2) 0.0278(18) 0.033(2) 0.0056(15) 0.0053(16) 0.0007(16) 
N5 0.043(2) 0.043(2) 0.0292(19) 0.0056(15) -0.017(2) -0.001(2) 
N7 0.028(2) 0.0276(17) 0.039(2) -0.0019(14) -0.007(2) -0.0009(19) 
C1 0.025(2) 0.0230(19) 0.0178(19) 0.0055(15) 0.0043(18) -0.0001(17) 
C2 0.031(3) 0.026(2) 0.019(2) 0.0029(16) 0.0079(19) 0.0023(18) 
C3 0.035(3) 0.031(2) 0.020(2) -0.0008(17) -0.0022(19) 0.002(2) 
C4 0.046(3) 0.026(2) 0.025(2) -0.0024(17) 0.008(2) -0.0045(19) 
C5 0.036(3) 0.023(2) 0.029(2) 0.0041(17) 0.010(2) -0.0027(18) 
C6 0.030(3) 0.0229(19) 0.023(2) 0.0058(15) 0.0052(18) -0.0027(17) 
C7 0.028(3) 0.030(2) 0.027(2) 0.0030(17) 0.0067(19) 0.0031(18) 
C8 0.030(3) 0.033(2) 0.045(3) 0.013(2) 0.007(2) 0.008(2) 
C9 0.046(3) 0.022(2) 0.052(3) 0.005(2) 0.016(3) 0.013(2) 
C10 0.043(3) 0.026(2) 0.036(3) 0.0002(18) 0.013(2) 0.004(2) 
C11 0.027(3) 0.024(2) 0.026(2) -0.0015(16) 0.0010(19) 0.0041(17) 
C12 0.037(2) 0.030(2) 0.035(2) -0.006(2) 0.0075(18) -0.001(2) 
C13 0.058(4) 0.031(2) 0.058(3) -0.017(2) 0.020(3) -0.010(2) 
C14 0.047(3) 0.046(3) 0.038(3) -0.019(2) 0.005(2) -0.002(2) 
C15 0.036(3) 0.037(3) 0.028(2) -0.0055(19) 0.000(2) 0.007(2) 
C16 0.029(3) 0.034(2) 0.023(2) -0.0021(17) -0.0027(19) 0.003(2) 
C17 0.075(4) 0.031(2) 0.027(2) -0.0001(19) 0.008(3) -0.003(3) 
C18 0.142(7) 0.044(3) 0.040(3) 0.008(3) 0.041(4) -0.001(4) 
C19 0.153(7) 0.059(4) 0.026(3) 0.005(3) 0.018(4) 0.007(4) 
C20 0.074(4) 0.062(4) 0.026(3) -0.002(2) -0.004(3) 0.015(3) 
C21 0.027(2) 0.028(2) 0.023(2) 0.0012(16) 0.0028(17) -0.0005(17) 
C22 0.033(3) 0.0243(19) 0.026(2) 0.0003(15) 0.006(2) 0.0008(18) 
C23 0.057(3) 0.040(2) 0.031(2) 0.000(2) 0.010(3) 0.013(2) 
C24 0.071(4) 0.056(3) 0.042(3) -0.007(2) 0.016(3) 0.034(3) 
C25 0.052(4) 0.044(3) 0.044(3) 0.004(2) 0.008(3) 0.019(3) 
C26 0.154(9) 0.053(4) 0.080(5) 0.028(3) 0.038(5) 0.037(4) 
C27 0.100(6) 0.123(7) 0.132(6) 0.073(6) 0.080(5) 0.040(6) 
C28 0.026(2) 0.035(2) 0.018(2) 0.0043(17) -0.0036(17) -0.0020(19) 
C29 0.021(2) 0.034(2) 0.026(2) 0.0081(18) -0.0011(18) -0.0047(18) 
C30 0.039(3) 0.029(2) 0.029(2) 0.0071(18) -0.009(2) -0.003(2) 
C31 0.033(3) 0.043(3) 0.035(3) 0.011(2) -0.005(2) -0.008(2) 
C32 0.030(3) 0.045(3) 0.024(2) 0.0064(19) 0.001(2) 0.003(2) 
C33 0.033(3) 0.032(2) 0.0160(19) 0.0044(16) -0.0003(18) 0.0009(19) 
C34 0.038(3) 0.039(3) 0.024(2) 0.0002(19) 0.004(2) 0.007(2) 
C35 0.049(4) 0.052(3) 0.033(3) 0.007(2) 0.010(3) 0.024(3) 
C36 0.042(3) 0.074(4) 0.039(3) 0.012(2) 0.005(3) 0.019(3) 
C37 0.027(3) 0.066(3) 0.033(2) 0.012(2) 0.000(2) 0.002(3) 
C38 0.032(3) 0.027(2) 0.027(2) 0.0004(17) -0.0048(19) 0.0020(18) 
C39 0.040(3) 0.034(2) 0.040(3) 0.0038(18) -0.010(2) -0.008(2) 
C40 0.054(4) 0.070(4) 0.055(3) 0.018(3) -0.029(3) -0.029(3) 
C41 0.049(4) 0.081(5) 0.070(4) 0.026(3) -0.018(3) -0.038(3) 
C42 0.039(3) 0.046(3) 0.052(3) 0.016(2) -0.007(3) -0.017(2) 
C43 0.026(2) 0.028(2) 0.035(2) 0.0028(19) -0.004(2) 0.0048(18) 
C44 0.035(3) 0.034(2) 0.032(2) 0.0037(18) -0.001(2) 0.002(2) 
C45 0.035(3) 0.050(3) 0.032(2) 0.0111(19) 0.000(2) 0.004(3) 
C46 0.039(3) 0.051(3) 0.049(3) 0.023(2) 0.003(3) 0.003(3) 
C47 0.049(3) 0.051(3) 0.063(4) 0.025(3) -0.005(3) -0.013(3) 
C48 0.041(3) 0.033(2) 0.031(2) 0.0064(19) 0.005(2) 0.002(2) 
C49 0.034(3) 0.032(2) 0.025(2) 0.0041(18) 0.005(2) 0.000(2) 
C50 0.046(3) 0.045(3) 0.036(3) 0.010(2) 0.008(2) -0.003(3) 
C51 0.033(3) 0.056(3) 0.051(3) 0.008(3) 0.009(3) 0.004(2) 
C52 0.036(3) 0.046(3) 0.043(3) 0.008(2) 0.009(2) 0.006(3) 
C53 0.063(4) 0.098(5) 0.045(3) 0.030(3) -0.026(3) -0.009(4) 
C54 0.087(5) 0.047(3) 0.034(3) 0.004(2) -0.003(3) 0.013(3) 
C55 0.068(5) 0.078(5) 0.052(4) 0.012(3) -0.001(3) -0.041(4) 
C56 0.065(4) 0.029(3) 0.114(6) 0.004(3) 0.004(4) -0.001(3) 
C57 0.041(3) 0.047(3) 0.070(4) 0.002(3) 0.006(3) 0.000(3) 
C58 0.231(10) 0.090(5) 0.032(3) -0.019(3) 0.018(5) -0.077(7) 
C59 0.118(7) 0.108(6) 0.076(5) -0.017(4) 0.020(5) 0.047(6) 
C60 0.088(5) 0.138(7) 0.041(4) -0.022(4) -0.020(4) 0.006(5) 
C61 0.064(9) 0.057(8) 0.119(12) -0.002(7) -0.020(8) -0.009(6) 
C62 0.057(9) 0.042(8) 0.042(7) 0.000(6) 0.010(6) 0.003(6) 
C63 0.045(8) 0.029(6) 0.026(5) 0.008(5) -0.004(5) 0.001(6) 
C64 0.053(10) 0.046(9) 0.047(13) 0.012(8) 0.001(8) -0.007(8) 
C65 0.066(9) 0.078(11) 0.025(6) 0.010(7) 0.003(6) -0.006(9) 
C66 0.044(8) 0.055(7) 0.055(7) 0.014(6) 0.022(7) 0.025(7) 
C67 0.048(11) 0.047(7) 0.054(7) -0.011(5) 0.026(7) 0.006(6) 
C68 0.088(13) 0.065(11) 0.138(16) -0.019(10) -0.001(11) 0.027(10) 
C69 0.023(11) 0.066(11) 0.078(11) 0.019(9) 0.036(10) 0.023(8) 
C70 0.042(11) 0.085(16) 0.084(13) -0.024(11) 0.019(9) 0.030(10) 
C71 0.068(11) 0.049(10) 0.052(10) 0.008(8) 0.005(8) 0.019(9) 
C72 0.076(16) 0.039(9) 0.060(11) -0.010(8) 0.014(10) 0.006(10) 
C73 0.16(3) 0.060(16) 0.037(17) 0.009(12) 0.033(17) 0.014(18) 
C74 0.070(13) 0.053(11) 0.067(13) 0.002(10) 0.019(11) 0.038(11) 
 
_geom_special_details 
; 
 All esds (except the esd in the dihedral angle between two l.s. planes) 
 are estimated using the full covariance matrix.  The cell esds are taken 
 into account individually in the estimation of esds in distances, angles 
 and torsion angles; correlations between esds in cell parameters are only 
 used when they are defined by crystal symmetry.  An approximate (isotropic) 
 treatment of cell esds is used for estimating esds involving l.s. planes. 
; 
 
loop_ 
 _geom_bond_atom_site_label_1 
 _geom_bond_atom_site_label_2 
 _geom_bond_distance 
 _geom_bond_site_symmetry_2 
 _geom_bond_publ_flag 
Yb1 N7 2.169(3) . ? 
Yb1 N6 2.266(4) . ? 
Yb1 N3 2.283(3) . ? 
Yb1 N1 2.385(3) . ? 
Yb1 N4 2.389(3) . ? 
Si1 N7 1.743(4) . ? 
Si1 C57 1.848(5) . ? 
Si1 C55 1.867(6) . ? 
Si1 C56 1.883(5) . ? 
Si2 N7 1.735(4) . ? 
Si2 C60 1.860(7) . ? 
Si2 C58 1.880(6) . ? 
Si2 C59 1.888(7) . ? 
N1 C21 1.309(5) . ? 
N1 C2 1.443(5) . ? 
N2 C27 1.409(8) . ? 
N2 C26 1.424(7) . ? 
N2 C12 1.430(5) . ? 
N3 C25 1.357(6) . ? 
N3 C22 1.396(5) . ? 
N4 C48 1.305(5) . ? 
N4 C29 1.431(5) . ? 
N6 C52 1.351(5) . ? 
N6 C49 1.394(5) . ? 
N5 C39 1.420(5) . ? 
N5 C53 1.443(6) . ? 
N5 C54 1.445(6) . ? 
C1 C2 1.373(6) . ? 
C1 C6 1.433(6) . ? 
C1 C11 1.513(5) . ? 
C2 C3 1.422(6) . ? 
C3 C4 1.365(6) . ? 
C3 H3 0.9500 . ? 
C4 C5 1.414(6) . ? 
C4 H4 0.9500 . ? 
C5 C10 1.423(6) . ? 
C5 C6 1.426(6) . ? 
C6 C7 1.418(6) . ? 
C7 C8 1.374(6) . ? 
C7 H7 0.9500 . ? 
C8 C9 1.403(7) . ? 
C8 H8 0.9500 . ? 
C9 C10 1.361(7) . ? 
C9 H9 0.9500 . ? 
C10 H10 0.9500 . ? 
C11 C12 1.376(6) . ? 
C11 C16 1.438(6) . ? 
C12 C13 1.424(6) . ? 
C13 C14 1.352(7) . ? 
C13 H13 0.9500 . ? 
C14 C15 1.412(7) . ? 
C14 H14 0.9500 . ? 
C15 C20 1.407(7) . ? 
C15 C16 1.429(6) . ? 
C16 C17 1.415(6) . ? 
C17 C18 1.376(7) . ? 
C17 H17 0.9500 . ? 
C18 C19 1.401(8) . ? 
C18 H18 0.9500 . ? 
C19 C20 1.353(8) . ? 
C19 H19 0.9500 . ? 
C20 H20 0.9500 . ? 
C21 C22 1.412(5) . ? 
C21 H21 0.9500 . ? 
C22 C23 1.393(6) . ? 
C23 C24 1.386(7) . ? 
C23 H23 0.9500 . ? 
C24 C25 1.389(7) . ? 
C24 H24 0.9500 . ? 
C25 H25 0.9500 . ? 
C26 H26A 0.9800 . ? 
C26 H26B 0.9800 . ? 
C26 H26C 0.9800 . ? 
C27 H27A 0.9800 . ? 
C27 H27B 0.9800 . ? 
C27 H27C 0.9800 . ? 
C28 C29 1.369(6) . ? 
C28 C33 1.444(6) . ? 
C28 C38 1.495(6) . ? 
C29 C30 1.433(6) . ? 
C30 C31 1.358(6) . ? 
C30 H30 0.9500 . ? 
C31 C32 1.412(6) . ? 
C31 H31 0.9500 . ? 
C32 C37 1.417(7) . ? 
C32 C33 1.419(6) . ? 
C33 C34 1.424(6) . ? 
C34 C35 1.373(7) . ? 
C34 H34 0.9500 . ? 
C35 C36 1.408(8) . ? 
C35 H35 0.9500 . ? 
C36 C37 1.376(7) . ? 
C36 H36 0.9500 . ? 
C37 H37 0.9500 . ? 
C38 C39 1.401(6) . ? 
C38 C43 1.438(6) . ? 
C39 C40 1.416(7) . ? 
C40 C41 1.378(7) . ? 
C40 H40 0.9500 . ? 
C41 C42 1.407(7) . ? 
C41 H41 0.9500 . ? 
C42 C43 1.421(6) . ? 
C42 C47 1.429(7) . ? 
C43 C44 1.413(6) . ? 
C44 C45 1.374(6) . ? 
C44 H44 0.9500 . ? 
C45 C46 1.403(7) . ? 
C45 H45 0.9500 . ? 
C46 C47 1.343(7) . ? 
C46 H46 0.9500 . ? 
C47 H47 0.9500 . ? 
C48 C49 1.419(6) . ? 
C48 H48 0.9500 . ? 
C49 C50 1.378(6) . ? 
C50 C51 1.402(7) . ? 
C50 H50 0.9500 . ? 
C51 C52 1.391(6) . ? 
C51 H51 0.9500 . ? 
C52 H52 0.9500 . ? 
C53 H53A 0.9800 . ? 
C53 H53B 0.9800 . ? 
C53 H53C 0.9800 . ? 
C54 H54A 0.9800 . ? 
C54 H54B 0.9800 . ? 
C54 H54C 0.9800 . ? 
C55 H55A 0.9800 . ? 
C55 H55B 0.9800 . ? 
C55 H55C 0.9800 . ? 
C56 H56A 0.9800 . ? 
C56 H56B 0.9800 . ? 
C56 H56C 0.9800 . ? 
C57 H57A 0.9800 . ? 
C57 H57B 0.9800 . ? 
C57 H57C 0.9800 . ? 
C58 H58A 0.9800 . ? 
C58 H58B 0.9800 . ? 
C58 H58C 0.9800 . ? 
C59 H59A 0.9800 . ? 
C59 H59B 0.9800 . ? 
C59 H59C 0.9800 . ? 
C60 H60A 0.9800 . ? 
C60 H60B 0.9800 . ? 
C60 H60C 0.9800 . ? 
C61 C62 1.497(7) . ? 
C61 H61A 0.9800 . ? 
C61 H61B 0.9800 . ? 
C61 H61C 0.9800 . ? 
C62 C63 1.3900 . ? 
C62 C67 1.3900 . ? 
C63 C64 1.3900 . ? 
C63 H63A 0.9500 . ? 
C64 C65 1.3900 . ? 
C64 H64A 0.9500 . ? 
C65 C66 1.3900 . ? 
C65 H65A 0.9500 . ? 
C66 C67 1.3900 . ? 
C66 H66A 0.9500 . ? 
C67 H67A 0.9500 . ? 
C68 C69 1.499(8) . ? 
C68 H68A 0.9800 . ? 
C68 H68B 0.9800 . ? 
C68 H68C 0.9800 . ? 
C69 C70 1.3900 . ? 
C69 C74 1.3900 . ? 
C70 C71 1.3900 . ? 
C70 H70A 0.9500 . ? 
C71 C72 1.3900 . ? 
C71 H71A 0.9500 . ? 
C72 C73 1.3900 . ? 
C72 H72A 0.9500 . ? 
C73 C74 1.3900 . ? 
C73 H73A 0.9500 . ? 
C74 H74A 0.9500 . ? 
 
loop_ 
 _geom_angle_atom_site_label_1 
 _geom_angle_atom_site_label_2 
 _geom_angle_atom_site_label_3 
 _geom_angle 
 _geom_angle_site_symmetry_1 
 _geom_angle_site_symmetry_3 
 _geom_angle_publ_flag 
N7 Yb1 N6 116.07(14) . . ? 
N7 Yb1 N3 120.78(14) . . ? 
N6 Yb1 N3 123.15(13) . . ? 
N7 Yb1 N1 108.70(12) . . ? 
N6 Yb1 N1 89.64(12) . . ? 
N3 Yb1 N1 72.84(12) . . ? 
N7 Yb1 N4 106.16(12) . . ? 
N6 Yb1 N4 72.90(12) . . ? 
N3 Yb1 N4 91.38(12) . . ? 
N1 Yb1 N4 145.06(11) . . ? 
N7 Si1 C57 111.7(2) . . ? 
N7 Si1 C55 111.5(2) . . ? 
C57 Si1 C55 106.9(3) . . ? 
N7 Si1 C56 112.6(2) . . ? 
C57 Si1 C56 107.3(3) . . ? 
C55 Si1 C56 106.5(3) . . ? 
N7 Si2 C60 114.3(3) . . ? 
N7 Si2 C58 112.1(2) . . ? 
C60 Si2 C58 104.3(4) . . ? 
N7 Si2 C59 112.1(3) . . ? 
C60 Si2 C59 108.0(4) . . ? 
C58 Si2 C59 105.5(4) . . ? 
C21 N1 C2 121.1(3) . . ? 
C21 N1 Yb1 113.1(3) . . ? 
C2 N1 Yb1 125.7(2) . . ? 
C27 N2 C26 113.4(5) . . ? 
C27 N2 C12 115.1(5) . . ? 
C26 N2 C12 116.3(4) . . ? 
C25 N3 C22 104.7(4) . . ? 
C25 N3 Yb1 140.8(3) . . ? 
C22 N3 Yb1 113.6(3) . . ? 
C48 N4 C29 123.6(3) . . ? 
C48 N4 Yb1 112.5(3) . . ? 
C29 N4 Yb1 123.9(3) . . ? 
C52 N6 C49 105.3(4) . . ? 
C52 N6 Yb1 139.3(3) . . ? 
C49 N6 Yb1 114.4(3) . . ? 
C39 N5 C53 116.5(4) . . ? 
C39 N5 C54 113.9(4) . . ? 
C53 N5 C54 111.7(4) . . ? 
Si2 N7 Si1 119.7(2) . . ? 
Si2 N7 Yb1 121.7(2) . . ? 
Si1 N7 Yb1 118.54(19) . . ? 
C2 C1 C6 119.2(4) . . ? 
C2 C1 C11 121.8(4) . . ? 
C6 C1 C11 119.1(4) . . ? 
C1 C2 C3 120.0(4) . . ? 
C1 C2 N1 126.8(4) . . ? 
C3 C2 N1 113.2(4) . . ? 
C4 C3 C2 121.9(4) . . ? 
C4 C3 H3 119.0 . . ? 
C2 C3 H3 119.0 . . ? 
C3 C4 C5 119.8(4) . . ? 
C3 C4 H4 120.1 . . ? 
C5 C4 H4 120.1 . . ? 
C4 C5 C10 121.6(4) . . ? 
C4 C5 C6 118.9(4) . . ? 
C10 C5 C6 119.5(4) . . ? 
C7 C6 C5 117.5(4) . . ? 
C7 C6 C1 122.3(4) . . ? 
C5 C6 C1 120.2(4) . . ? 
C8 C7 C6 121.5(4) . . ? 
C8 C7 H7 119.3 . . ? 
C6 C7 H7 119.3 . . ? 
C7 C8 C9 120.5(4) . . ? 
C7 C8 H8 119.8 . . ? 
C9 C8 H8 119.8 . . ? 
C10 C9 C8 120.1(4) . . ? 
C10 C9 H9 120.0 . . ? 
C8 C9 H9 120.0 . . ? 
C9 C10 C5 120.9(4) . . ? 
C9 C10 H10 119.6 . . ? 
C5 C10 H10 119.6 . . ? 
C12 C11 C16 119.5(4) . . ? 
C12 C11 C1 122.0(4) . . ? 
C16 C11 C1 118.4(3) . . ? 
C11 C12 C13 119.3(4) . . ? 
C11 C12 N2 118.9(4) . . ? 
C13 C12 N2 121.7(4) . . ? 
C14 C13 C12 122.0(4) . . ? 
C14 C13 H13 119.0 . . ? 
C12 C13 H13 119.0 . . ? 
C13 C14 C15 121.1(4) . . ? 
C13 C14 H14 119.5 . . ? 
C15 C14 H14 119.5 . . ? 
C20 C15 C14 122.6(5) . . ? 
C20 C15 C16 119.4(4) . . ? 
C14 C15 C16 118.0(4) . . ? 
C17 C16 C15 117.8(4) . . ? 
C17 C16 C11 122.0(4) . . ? 
C15 C16 C11 120.1(4) . . ? 
C18 C17 C16 121.3(5) . . ? 
C18 C17 H17 119.4 . . ? 
C16 C17 H17 119.4 . . ? 
C17 C18 C19 119.6(6) . . ? 
C17 C18 H18 120.2 . . ? 
C19 C18 H18 120.2 . . ? 
C20 C19 C18 121.2(5) . . ? 
C20 C19 H19 119.4 . . ? 
C18 C19 H19 119.4 . . ? 
C19 C20 C15 120.7(5) . . ? 
C19 C20 H20 119.6 . . ? 
C15 C20 H20 119.6 . . ? 
N1 C21 C22 120.4(4) . . ? 
N1 C21 H21 119.8 . . ? 
C22 C21 H21 119.8 . . ? 
C23 C22 N3 110.4(4) . . ? 
C23 C22 C21 129.4(4) . . ? 
N3 C22 C21 119.9(3) . . ? 
C24 C23 C22 106.6(4) . . ? 
C24 C23 H23 126.7 . . ? 
C22 C23 H23 126.7 . . ? 
C23 C24 C25 106.6(4) . . ? 
C23 C24 H24 126.7 . . ? 
C25 C24 H24 126.7 . . ? 
N3 C25 C24 111.8(5) . . ? 
N3 C25 H25 124.1 . . ? 
C24 C25 H25 124.1 . . ? 
N2 C26 H26A 109.5 . . ? 
N2 C26 H26B 109.5 . . ? 
H26A C26 H26B 109.5 . . ? 
N2 C26 H26C 109.5 . . ? 
H26A C26 H26C 109.5 . . ? 
H26B C26 H26C 109.5 . . ? 
N2 C27 H27A 109.5 . . ? 
N2 C27 H27B 109.5 . . ? 
H27A C27 H27B 109.5 . . ? 
N2 C27 H27C 109.5 . . ? 
H27A C27 H27C 109.5 . . ? 
H27B C27 H27C 109.5 . . ? 
C29 C28 C33 119.1(4) . . ? 
C29 C28 C38 122.8(4) . . ? 
C33 C28 C38 118.1(4) . . ? 
C28 C29 N4 127.4(4) . . ? 
C28 C29 C30 119.4(4) . . ? 
N4 C29 C30 113.1(4) . . ? 
C31 C30 C29 121.9(4) . . ? 
C31 C30 H30 119.0 . . ? 
C29 C30 H30 119.0 . . ? 
C30 C31 C32 120.6(5) . . ? 
C30 C31 H31 119.7 . . ? 
C32 C31 H31 119.7 . . ? 
C31 C32 C37 121.0(5) . . ? 
C31 C32 C33 118.2(4) . . ? 
C37 C32 C33 120.8(4) . . ? 
C32 C33 C34 117.6(4) . . ? 
C32 C33 C28 120.7(4) . . ? 
C34 C33 C28 121.7(4) . . ? 
C35 C34 C33 121.0(5) . . ? 
C35 C34 H34 119.5 . . ? 
C33 C34 H34 119.5 . . ? 
C34 C35 C36 120.5(5) . . ? 
C34 C35 H35 119.8 . . ? 
C36 C35 H35 119.8 . . ? 
C37 C36 C35 120.6(5) . . ? 
C37 C36 H36 119.7 . . ? 
C35 C36 H36 119.7 . . ? 
C36 C37 C32 119.5(5) . . ? 
C36 C37 H37 120.3 . . ? 
C32 C37 H37 120.3 . . ? 
C39 C38 C43 119.4(4) . . ? 
C39 C38 C28 120.2(4) . . ? 
C43 C38 C28 120.4(4) . . ? 
C38 C39 C40 118.9(4) . . ? 
C38 C39 N5 119.0(4) . . ? 
C40 C39 N5 122.1(4) . . ? 
C41 C40 C39 122.1(5) . . ? 
C41 C40 H40 118.9 . . ? 
C39 C40 H40 118.9 . . ? 
C40 C41 C42 120.2(5) . . ? 
C40 C41 H41 119.9 . . ? 
C42 C41 H41 119.9 . . ? 
C41 C42 C43 119.0(4) . . ? 
C41 C42 C47 121.2(5) . . ? 
C43 C42 C47 119.7(5) . . ? 
C44 C43 C42 117.2(4) . . ? 
C44 C43 C38 122.6(4) . . ? 
C42 C43 C38 120.2(4) . . ? 
C45 C44 C43 121.4(4) . . ? 
C45 C44 H44 119.3 . . ? 
C43 C44 H44 119.3 . . ? 
C44 C45 C46 120.7(5) . . ? 
C44 C45 H45 119.7 . . ? 
C46 C45 H45 119.7 . . ? 
C47 C46 C45 119.9(4) . . ? 
C47 C46 H46 120.0 . . ? 
C45 C46 H46 120.0 . . ? 
C46 C47 C42 121.0(5) . . ? 
C46 C47 H47 119.5 . . ? 
C42 C47 H47 119.5 . . ? 
N4 C48 C49 121.0(4) . . ? 
N4 C48 H48 119.5 . . ? 
C49 C48 H48 119.5 . . ? 
C50 C49 N6 110.2(4) . . ? 
C50 C49 C48 130.7(4) . . ? 
N6 C49 C48 118.9(4) . . ? 
C49 C50 C51 107.0(4) . . ? 
C49 C50 H50 126.5 . . ? 
C51 C50 H50 126.5 . . ? 
C52 C51 C50 105.7(5) . . ? 
C52 C51 H51 127.1 . . ? 
C50 C51 H51 127.1 . . ? 
N6 C52 C51 111.7(4) . . ? 
N6 C52 H52 124.1 . . ? 
C51 C52 H52 124.1 . . ? 
N5 C53 H53A 109.5 . . ? 
N5 C53 H53B 109.5 . . ? 
H53A C53 H53B 109.5 . . ? 
N5 C53 H53C 109.5 . . ? 
H53A C53 H53C 109.5 . . ? 
H53B C53 H53C 109.5 . . ? 
N5 C54 H54A 109.5 . . ? 
N5 C54 H54B 109.5 . . ? 
H54A C54 H54B 109.5 . . ? 
N5 C54 H54C 109.5 . . ? 
H54A C54 H54C 109.5 . . ? 
H54B C54 H54C 109.5 . . ? 
Si1 C55 H55A 109.5 . . ? 
Si1 C55 H55B 109.5 . . ? 
H55A C55 H55B 109.5 . . ? 
Si1 C55 H55C 109.5 . . ? 
H55A C55 H55C 109.5 . . ? 
H55B C55 H55C 109.5 . . ? 
Si1 C56 H56A 109.5 . . ? 
Si1 C56 H56B 109.5 . . ? 
H56A C56 H56B 109.5 . . ? 
Si1 C56 H56C 109.5 . . ? 
H56A C56 H56C 109.5 . . ? 
H56B C56 H56C 109.5 . . ? 
Si1 C57 H57A 109.5 . . ? 
Si1 C57 H57B 109.5 . . ? 
H57A C57 H57B 109.5 . . ? 
Si1 C57 H57C 109.5 . . ? 
H57A C57 H57C 109.5 . . ? 
H57B C57 H57C 109.5 . . ? 
Si2 C58 H58A 109.5 . . ? 
Si2 C58 H58B 109.5 . . ? 
H58A C58 H58B 109.5 . . ? 
Si2 C58 H58C 109.5 . . ? 
H58A C58 H58C 109.5 . . ? 
H58B C58 H58C 109.5 . . ? 
Si2 C59 H59A 109.5 . . ? 
Si2 C59 H59B 109.5 . . ? 
H59A C59 H59B 109.5 . . ? 
Si2 C59 H59C 109.5 . . ? 
H59A C59 H59C 109.5 . . ? 
H59B C59 H59C 109.5 . . ? 
Si2 C60 H60A 109.5 . . ? 
Si2 C60 H60B 109.5 . . ? 
H60A C60 H60B 109.5 . . ? 
Si2 C60 H60C 109.5 . . ? 
H60A C60 H60C 109.5 . . ? 
H60B C60 H60C 109.5 . . ? 
C62 C61 H61A 109.5 . . ? 
C62 C61 H61B 109.5 . . ? 
H61A C61 H61B 109.5 . . ? 
C62 C61 H61C 109.5 . . ? 
H61A C61 H61C 109.5 . . ? 
H61B C61 H61C 109.5 . . ? 
C63 C62 C67 120.0 . . ? 
C63 C62 C61 120.3(6) . . ? 
C67 C62 C61 119.7(6) . . ? 
C62 C63 C64 120.0 . . ? 
C62 C63 H63A 120.0 . . ? 
C64 C63 H63A 120.0 . . ? 
C63 C64 C65 120.0 . . ? 
C63 C64 H64A 120.0 . . ? 
C65 C64 H64A 120.0 . . ? 
C66 C65 C64 120.0 . . ? 
C66 C65 H65A 120.0 . . ? 
C64 C65 H65A 120.0 . . ? 
C65 C66 C67 120.0 . . ? 
C65 C66 H66A 120.0 . . ? 
C67 C66 H66A 120.0 . . ? 
C66 C67 C62 120.0 . . ? 
C66 C67 H67A 120.0 . . ? 
C62 C67 H67A 120.0 . . ? 
C69 C68 H68A 109.5 . . ? 
C69 C68 H68B 109.5 . . ? 
H68A C68 H68B 109.5 . . ? 
C69 C68 H68C 109.5 . . ? 
H68A C68 H68C 109.5 . . ? 
H68B C68 H68C 109.5 . . ? 
C70 C69 C74 120.0 . . ? 
C70 C69 C68 119.8(7) . . ? 
C74 C69 C68 119.9(7) . . ? 
C69 C70 C71 120.0 . . ? 
C69 C70 H70A 120.0 . . ? 
C71 C70 H70A 120.0 . . ? 
C72 C71 C70 120.0 . . ? 
C72 C71 H71A 120.0 . . ? 
C70 C71 H71A 120.0 . . ? 
C71 C72 C73 120.0 . . ? 
C71 C72 H72A 120.0 . . ? 
C73 C72 H72A 120.0 . . ? 
C74 C73 C72 120.0 . . ? 
C74 C73 H73A 120.0 . . ? 
C72 C73 H73A 120.0 . . ? 
C73 C74 C69 120.0 . . ? 
C73 C74 H74A 120.0 . . ? 
C69 C74 H74A 120.0 . . ? 
 
loop_ 
 _geom_torsion_atom_site_label_1 
 _geom_torsion_atom_site_label_2 
 _geom_torsion_atom_site_label_3 
 _geom_torsion_atom_site_label_4 
 _geom_torsion 
 _geom_torsion_site_symmetry_1 
 _geom_torsion_site_symmetry_2 
 _geom_torsion_site_symmetry_3 
 _geom_torsion_site_symmetry_4 
 _geom_torsion_publ_flag 
N7 Yb1 N1 C21 114.6(3) . . . . ? 
N6 Yb1 N1 C21 -127.9(3) . . . . ? 
N3 Yb1 N1 C21 -2.9(3) . . . . ? 
N4 Yb1 N1 C21 -69.4(4) . . . . ? 
N7 Yb1 N1 C2 -61.9(3) . . . . ? 
N6 Yb1 N1 C2 55.6(3) . . . . ? 
N3 Yb1 N1 C2 -179.3(3) . . . . ? 
N4 Yb1 N1 C2 114.1(3) . . . . ? 
N7 Yb1 N3 C25 67.5(5) . . . . ? 
N6 Yb1 N3 C25 -112.7(5) . . . . ? 
N1 Yb1 N3 C25 169.4(5) . . . . ? 
N4 Yb1 N3 C25 -42.3(5) . . . . ? 
N7 Yb1 N3 C22 -99.7(3) . . . . ? 
N6 Yb1 N3 C22 80.1(3) . . . . ? 
N1 Yb1 N3 C22 2.2(3) . . . . ? 
N4 Yb1 N3 C22 150.5(3) . . . . ? 
N7 Yb1 N4 C48 108.8(3) . . . . ? 
N6 Yb1 N4 C48 -4.1(3) . . . . ? 
N3 Yb1 N4 C48 -128.5(3) . . . . ? 
N1 Yb1 N4 C48 -67.3(4) . . . . ? 
N7 Yb1 N4 C29 -68.9(3) . . . . ? 
N6 Yb1 N4 C29 178.1(3) . . . . ? 
N3 Yb1 N4 C29 53.7(3) . . . . ? 
N1 Yb1 N4 C29 115.0(3) . . . . ? 
N7 Yb1 N6 C52 71.3(5) . . . . ? 
N3 Yb1 N6 C52 -108.5(5) . . . . ? 
N1 Yb1 N6 C52 -39.4(5) . . . . ? 
N4 Yb1 N6 C52 171.3(5) . . . . ? 
N7 Yb1 N6 C49 -95.8(3) . . . . ? 
N3 Yb1 N6 C49 84.4(3) . . . . ? 
N1 Yb1 N6 C49 153.5(3) . . . . ? 
N4 Yb1 N6 C49 4.3(3) . . . . ? 
C60 Si2 N7 Si1 -43.2(4) . . . . ? 
C58 Si2 N7 Si1 -161.6(4) . . . . ? 
C59 Si2 N7 Si1 80.0(4) . . . . ? 
C60 Si2 N7 Yb1 137.7(3) . . . . ? 
C58 Si2 N7 Yb1 19.3(4) . . . . ? 
C59 Si2 N7 Yb1 -99.1(4) . . . . ? 
C57 Si1 N7 Si2 74.0(3) . . . . ? 
C55 Si1 N7 Si2 -166.5(3) . . . . ? 
C56 Si1 N7 Si2 -46.9(3) . . . . ? 
C57 Si1 N7 Yb1 -106.9(3) . . . . ? 
C55 Si1 N7 Yb1 12.6(3) . . . . ? 
C56 Si1 N7 Yb1 132.2(3) . . . . ? 
N6 Yb1 N7 Si2 20.7(3) . . . . ? 
N3 Yb1 N7 Si2 -159.49(19) . . . . ? 
N1 Yb1 N7 Si2 119.8(2) . . . . ? 
N4 Yb1 N7 Si2 -57.8(2) . . . . ? 
N6 Yb1 N7 Si1 -158.42(18) . . . . ? 
N3 Yb1 N7 Si1 21.4(3) . . . . ? 
N1 Yb1 N7 Si1 -59.3(2) . . . . ? 
N4 Yb1 N7 Si1 123.05(19) . . . . ? 
C6 C1 C2 C3 -0.5(6) . . . . ? 
C11 C1 C2 C3 178.9(4) . . . . ? 
C6 C1 C2 N1 177.6(4) . . . . ? 
C11 C1 C2 N1 -3.0(6) . . . . ? 
C21 N1 C2 C1 37.2(6) . . . . ? 
Yb1 N1 C2 C1 -146.6(3) . . . . ? 
C21 N1 C2 C3 -144.6(4) . . . . ? 
Yb1 N1 C2 C3 31.6(5) . . . . ? 
C1 C2 C3 C4 -0.9(6) . . . . ? 
N1 C2 C3 C4 -179.2(4) . . . . ? 
C2 C3 C4 C5 0.8(6) . . . . ? 
C3 C4 C5 C10 -178.8(4) . . . . ? 
C3 C4 C5 C6 0.7(6) . . . . ? 
C4 C5 C6 C7 179.2(4) . . . . ? 
C10 C5 C6 C7 -1.3(6) . . . . ? 
C4 C5 C6 C1 -2.0(6) . . . . ? 
C10 C5 C6 C1 177.5(4) . . . . ? 
C2 C1 C6 C7 -179.3(4) . . . . ? 
C11 C1 C6 C7 1.3(6) . . . . ? 
C2 C1 C6 C5 1.9(6) . . . . ? 
C11 C1 C6 C5 -177.4(4) . . . . ? 
C5 C6 C7 C8 1.6(6) . . . . ? 
C1 C6 C7 C8 -177.2(4) . . . . ? 
C6 C7 C8 C9 -0.8(6) . . . . ? 
C7 C8 C9 C10 -0.4(7) . . . . ? 
C8 C9 C10 C5 0.7(7) . . . . ? 
C4 C5 C10 C9 179.7(4) . . . . ? 
C6 C5 C10 C9 0.2(6) . . . . ? 
C2 C1 C11 C12 74.4(6) . . . . ? 
C6 C1 C11 C12 -106.3(5) . . . . ? 
C2 C1 C11 C16 -102.7(5) . . . . ? 
C6 C1 C11 C16 76.6(5) . . . . ? 
C16 C11 C12 C13 2.2(7) . . . . ? 
C1 C11 C12 C13 -174.9(4) . . . . ? 
C16 C11 C12 N2 -179.6(4) . . . . ? 
C1 C11 C12 N2 3.3(7) . . . . ? 
C27 N2 C12 C11 81.2(7) . . . . ? 
C26 N2 C12 C11 -142.7(6) . . . . ? 
C27 N2 C12 C13 -100.6(6) . . . . ? 
C26 N2 C12 C13 35.5(8) . . . . ? 
C11 C12 C13 C14 -0.5(8) . . . . ? 
N2 C12 C13 C14 -178.7(5) . . . . ? 
C12 C13 C14 C15 -1.2(8) . . . . ? 
C13 C14 C15 C20 -178.3(5) . . . . ? 
C13 C14 C15 C16 1.1(8) . . . . ? 
C20 C15 C16 C17 -1.1(7) . . . . ? 
C14 C15 C16 C17 179.5(5) . . . . ? 
C20 C15 C16 C11 -179.9(5) . . . . ? 
C14 C15 C16 C11 0.6(7) . . . . ? 
C12 C11 C16 C17 178.9(5) . . . . ? 
C1 C11 C16 C17 -3.9(7) . . . . ? 
C12 C11 C16 C15 -2.3(7) . . . . ? 
C1 C11 C16 C15 174.9(4) . . . . ? 
C15 C16 C17 C18 0.7(8) . . . . ? 
C11 C16 C17 C18 179.6(6) . . . . ? 
C16 C17 C18 C19 -0.8(11) . . . . ? 
C17 C18 C19 C20 1.3(12) . . . . ? 
C18 C19 C20 C15 -1.7(11) . . . . ? 
C14 C15 C20 C19 -179.0(6) . . . . ? 
C16 C15 C20 C19 1.6(9) . . . . ? 
C2 N1 C21 C22 179.8(4) . . . . ? 
Yb1 N1 C21 C22 3.2(5) . . . . ? 
C25 N3 C22 C23 0.7(5) . . . . ? 
Yb1 N3 C22 C23 172.3(3) . . . . ? 
C25 N3 C22 C21 -173.2(4) . . . . ? 
Yb1 N3 C22 C21 -1.5(5) . . . . ? 
N1 C21 C22 C23 -173.8(5) . . . . ? 
N1 C21 C22 N3 -1.3(6) . . . . ? 
N3 C22 C23 C24 -0.3(5) . . . . ? 
C21 C22 C23 C24 172.9(5) . . . . ? 
C22 C23 C24 C25 -0.2(6) . . . . ? 
C22 N3 C25 C24 -0.8(6) . . . . ? 
Yb1 N3 C25 C24 -168.7(4) . . . . ? 
C23 C24 C25 N3 0.6(7) . . . . ? 
C33 C28 C29 N4 174.8(4) . . . . ? 
C38 C28 C29 N4 -4.8(7) . . . . ? 
C33 C28 C29 C30 -1.0(6) . . . . ? 
C38 C28 C29 C30 179.4(4) . . . . ? 
C48 N4 C29 C28 37.1(7) . . . . ? 
Yb1 N4 C29 C28 -145.4(3) . . . . ? 
C48 N4 C29 C30 -146.9(4) . . . . ? 
Yb1 N4 C29 C30 30.6(5) . . . . ? 
C28 C29 C30 C31 -0.6(7) . . . . ? 
N4 C29 C30 C31 -177.0(4) . . . . ? 
C29 C30 C31 C32 1.0(7) . . . . ? 
C30 C31 C32 C37 -179.5(4) . . . . ? 
C30 C31 C32 C33 0.3(7) . . . . ? 
C31 C32 C33 C34 177.3(4) . . . . ? 
C37 C32 C33 C34 -2.9(6) . . . . ? 
C31 C32 C33 C28 -1.9(6) . . . . ? 
C37 C32 C33 C28 177.9(4) . . . . ? 
C29 C28 C33 C32 2.3(6) . . . . ? 
C38 C28 C33 C32 -178.1(4) . . . . ? 
C29 C28 C33 C34 -176.9(4) . . . . ? 
C38 C28 C33 C34 2.7(6) . . . . ? 
C32 C33 C34 C35 1.6(6) . . . . ? 
C28 C33 C34 C35 -179.2(4) . . . . ? 
C33 C34 C35 C36 0.8(7) . . . . ? 
C34 C35 C36 C37 -1.8(7) . . . . ? 
C35 C36 C37 C32 0.5(7) . . . . ? 
C31 C32 C37 C36 -178.3(4) . . . . ? 
C33 C32 C37 C36 1.9(7) . . . . ? 
C29 C28 C38 C39 68.0(6) . . . . ? 
C33 C28 C38 C39 -111.5(5) . . . . ? 
C29 C28 C38 C43 -111.3(5) . . . . ? 
C33 C28 C38 C43 69.1(5) . . . . ? 
C43 C38 C39 C40 1.1(7) . . . . ? 
C28 C38 C39 C40 -178.3(5) . . . . ? 
C43 C38 C39 N5 -179.0(4) . . . . ? 
C28 C38 C39 N5 1.6(6) . . . . ? 
C53 N5 C39 C38 -149.0(5) . . . . ? 
C54 N5 C39 C38 78.8(5) . . . . ? 
C53 N5 C39 C40 30.9(7) . . . . ? 
C54 N5 C39 C40 -101.4(6) . . . . ? 
C38 C39 C40 C41 -2.0(9) . . . . ? 
N5 C39 C40 C41 178.2(6) . . . . ? 
C39 C40 C41 C42 0.2(11) . . . . ? 
C40 C41 C42 C43 2.3(10) . . . . ? 
C40 C41 C42 C47 -178.7(6) . . . . ? 
C41 C42 C43 C44 176.0(5) . . . . ? 
C47 C42 C43 C44 -3.0(7) . . . . ? 
C41 C42 C43 C38 -3.1(8) . . . . ? 
C47 C42 C43 C38 177.9(5) . . . . ? 
C39 C38 C43 C44 -177.7(4) . . . . ? 
C28 C38 C43 C44 1.7(7) . . . . ? 
C39 C38 C43 C42 1.4(7) . . . . ? 
C28 C38 C43 C42 -179.2(4) . . . . ? 
C42 C43 C44 C45 1.6(7) . . . . ? 
C38 C43 C44 C45 -179.2(4) . . . . ? 
C43 C44 C45 C46 0.9(7) . . . . ? 
C44 C45 C46 C47 -2.2(8) . . . . ? 
C45 C46 C47 C42 0.8(9) . . . . ? 
C41 C42 C47 C46 -177.2(6) . . . . ? 
C43 C42 C47 C46 1.8(9) . . . . ? 
C29 N4 C48 C49 -178.7(4) . . . . ? 
Yb1 N4 C48 C49 3.6(5) . . . . ? 
C52 N6 C49 C50 0.1(5) . . . . ? 
Yb1 N6 C49 C50 171.4(3) . . . . ? 
C52 N6 C49 C48 -175.5(4) . . . . ? 
Yb1 N6 C49 C48 -4.2(5) . . . . ? 
N4 C48 C49 C50 -174.3(5) . . . . ? 
N4 C48 C49 N6 0.3(7) . . . . ? 
N6 C49 C50 C51 -0.8(6) . . . . ? 
C48 C49 C50 C51 174.2(5) . . . . ? 
C49 C50 C51 C52 1.1(6) . . . . ? 
C49 N6 C52 C51 0.6(5) . . . . ? 
Yb1 N6 C52 C51 -167.2(4) . . . . ? 
C50 C51 C52 N6 -1.1(6) . . . . ? 
C67 C62 C63 C64 0.0 . . . . ? 
C61 C62 C63 C64 179.7(11) . . . . ? 
C62 C63 C64 C65 0.0 . . . . ? 
C63 C64 C65 C66 0.0 . . . . ? 
C64 C65 C66 C67 0.0 . . . . ? 
C65 C66 C67 C62 0.0 . . . . ? 
C63 C62 C67 C66 0.0 . . . . ? 
C61 C62 C67 C66 -179.7(11) . . . . ? 
C74 C69 C70 C71 0.0 . . . . ? 
C68 C69 C70 C71 -173.7(15) . . . . ? 
C69 C70 C71 C72 0.0 . . . . ? 
C70 C71 C72 C73 0.0 . . . . ? 
C71 C72 C73 C74 0.0 . . . . ? 
C72 C73 C74 C69 0.0 . . . . ? 
C70 C69 C74 C73 0.0 . . . . ? 
C68 C69 C74 C73 173.7(15) . . . . ? 
 
_diffrn_measured_fraction_theta_max    0.994 
_diffrn_reflns_theta_full              27.86 
_diffrn_measured_fraction_theta_full   0.993 
_refine_diff_density_max    2.509 
_refine_diff_density_min   -1.090 
_refine_diff_density_rms    0.087 

#===END
